# Supplementary material for: New insights into the mechanism of synergetic photoredox/copper(i)-catalyzed carbocyanation of 1,3-dienes: a DFT study
Source: Royal Society of Chemistry journal article supplement (doi:10.1039/d3sc00002h), 2023-01-01
Supplement: d3sc00002h1.pdf [file d3sc00002h1.pdf]

## Supplementary Information

New insights into the mechanism of synergetic photoredox/copper(I)-catalyzed  
carbocyanation of 1,3-dienes: a DFT study

Yanhong Liu,<sup>ab</sup> Aili Feng,<sup>a</sup> Rongxiu Zhu,<sup>a</sup> and Dongju Zhang<sup>\*a</sup>

<sup>a</sup>Key Lab of Colloid and Interface Chemistry, Ministry of Education, Institute of Theoretical  
Chemistry, School of chemistry and chemical engineering, Shandong University, Jinan  
250100, P. R. China

<sup>b</sup>School of Radiology, Shandong First Medical University & Shandong Academy of Medical  
Sciences, Taian 271016, P. R. China

Corresponding author:

\*E-mail: zhangdj@sdu.edu.cn

Tel: +86-531-88365833

## Table of Contents

|                                                                                                                          |     |
|--------------------------------------------------------------------------------------------------------------------------|-----|
| I. Estimation of Barrier for Single Electron Transfer Process.....                                                       | S3  |
| II. Energy Calibration Calculations.....                                                                                 | S5  |
| III. Oxidative Quenching of PC* with NHP Ester.....                                                                      | S7  |
| IV Frontier Molecular Orbital Analyses for Two Quenching Processes of PC*.....                                           | S7  |
| V. Addition Reactions of Radical Species LCu(I) <sup>+</sup> ·2 <sup>-</sup> and 2 <sup>-</sup> with Substrate<br>1..... | S8  |
| VI. Spin Densities Analyses.....                                                                                         | S8  |
| VII. Addition Reactions of Radical Cy* with 1-Phenyl-1,3-Diene (1) .....                                                 | S9  |
| VIII. <span style="float: right;">Distortion–Interaction</span><br>Analyses.....                                         | S10 |
| IX. <span style="float: right;">Non-Covalent</span> <span style="float: right;">Interactions</span><br>Analyses.....     | S11 |
| X. Formation of the Copper(II) Species.....                                                                              | S12 |
| XI. Extended Application of the Proposed Mechanism.....                                                                  | S13 |
| XII. Thermodynamic Data.....                                                                                             | S14 |
| XIII. Cartesian Coordinates of all Structures Involved in This<br>Work.....                                              | S16 |

## I. Estimation of Barrier for Single Electron Transfer Process

According to the Marcus-Hush equation, the reorganization energy  $\lambda$  is decomposed into the inner-sphere nuclear reorganization energy  $\lambda_i$  and the outer-sphere solvent reorganization energy  $\lambda_o$ . The inner-sphere nuclear reorganization energy  $\lambda_i$  can be calculated from the equations (S1)-(S3):

$$\lambda_{i1} = \left| E^D(Q_P) - E^D(Q_R) \right| + \left| E^{D^+}(Q_P) - E^{D^+}(Q_R) \right| \quad (\text{S1})$$

$$\lambda_{i2} = \left| E^A(Q_P) - E^A(Q_R) \right| + \left| E^{A^-}(Q_P) - E^{A^-}(Q_R) \right| \quad (\text{S2})$$

$$\lambda_i = \frac{\lambda_{i1} + \lambda_{i2}}{2} \quad (\text{S3})$$

where  $\lambda_{i1}$  represents the reorganization energy of the electron-donating substrates (D),  $\lambda_{i2}$  is the reorganization energy of the electron-accepting substrates (A).  $Q_R$  and  $Q_P$  are the equilibrium geometries of the reactants and products, respectively.

In addition, the outer-sphere solvent reorganization energy  $\lambda_o$  can be obtained according to the equation (S4):

$$\lambda_o = \left( 332 \text{ kcal mol}^{-1} \right) \left( \frac{1}{2a_1} + \frac{1}{2a_2} - \frac{1}{R} \right) \left( \frac{1}{\varepsilon_{op}} - \frac{1}{\varepsilon} \right) \quad (\text{S4})$$

where  $a_1$  and  $a_2$  are the radii of the electron-donating substrates (D) and the electron-accepting substrates (A), respectively,  $R = a_1 + a_2$ ,  $\varepsilon_{op}$  and  $\varepsilon$  are the optical dielectric constant (2.087) and the static dielectric constant (10.125) of 1,2-dichloroethane (DCE), respectively. The radius of a molecule can be obtained by calculating the molecular volume via a Monte-Carlo integration as implemented in the Gaussian 16 program.

Therefore, the overall activation barrier of single electron transfer (SET) process can be calculated from the equations (S5) and (S6):

$$\lambda = \lambda_i + \lambda_o \quad (\text{S5})$$

$$\Delta G_{SET}^{\ddagger} = \frac{(\Delta G_r + \lambda)^2}{4\lambda} \quad (\text{S6})$$

where  $\Delta G_r$  is the reaction energy.

## II. Energy Calibration Calculations

**Table S1.** Relative Electronic and Gibbs Free Energies (in kcal mol<sup>-1</sup>) Calculated for Transition States (**TS9<sub>S</sub>**, **TS9<sub>R</sub>**, **TS10<sub>S</sub>**, and **TS10<sub>R</sub>**) Using the M06 Functional with Three Different Basis Sets [LANL2DZ(*f*)-6-311+G(d,p), SDD-6-311+G(d,p), Def2-TZVP)]<sup>a</sup>

| Transition states       | M06/LANL2DZ( <i>f</i> )-6-311+G(d,p)/PCM(DCE) |                  | M06/SDD-6-311+G(d,p)/PCM(DCE) |                  | M06/Def2-TZVP/PCM(DCE) |                  |
|-------------------------|-----------------------------------------------|------------------|-------------------------------|------------------|------------------------|------------------|
|                         | $\Delta\Delta E$                              | $\Delta\Delta G$ | $\Delta\Delta E$              | $\Delta\Delta G$ | $\Delta\Delta E$       | $\Delta\Delta G$ |
|                         | <b>TS9<sub>S</sub></b>                        | 0.0              | 0.0                           | 0.0              | 0.0                    | 0.0              |
| <b>TS9<sub>R</sub></b>  | 2.2                                           | 1.9              | 2.5                           | 2.1              | 2.4                    | 2.0              |
| <b>TS10<sub>S</sub></b> | 3.1                                           | 2.9              | 3.1                           | 2.8              | 2.9                    | 2.6              |
| <b>TS10<sub>R</sub></b> | 7.3                                           | 6.0              | 7.3                           | 6.0              | 6.9                    | 5.6              |

<sup>a</sup>All energies reported in this table were obtained through single-point energy calculations using the PCM solvent model with 1,2-dichloroethane (DCE) as solvent.

**Table S2.** Comparison of Relative Gibbs Free Energies for Two Key Transition States at Different Levels of Single-Point Energy Calculations: DLPNO-CCSD(T)/cc-PVTZ/SMD with tightPNO and RIJK vs. M06/LANL2DZ(*f*)+6-311+G(d,p)/PCM Levels<sup>a,b</sup>

| Transition states      | $\Delta\Delta G$ | $\Delta\Delta G^b$ |
|------------------------|------------------|--------------------|
| <b>TS9<sub>S</sub></b> | 0.0              | 0.0                |
| <b>TS9<sub>R</sub></b> | 1.9              | 1.3                |

<sup>a</sup>The input file for the DLPNO-CCSD(T)/cc-PVTZ/SMD calculations was prepared using Multiwfn 3.8 software (T. Lu and F. Chen, *J. Comput. Chem.*, 2012, **33**, 580–592).

<sup>b</sup>The relative Gibbs free energies (in kcal mol<sup>-1</sup>) of the two key transition states calculated at the DLPNO-CCSD(T)/cc-PVTZ/SMD level are fairly consistent with those reported in the main body text.

### III. Oxidative Quenching of PC\* with NHP Ester

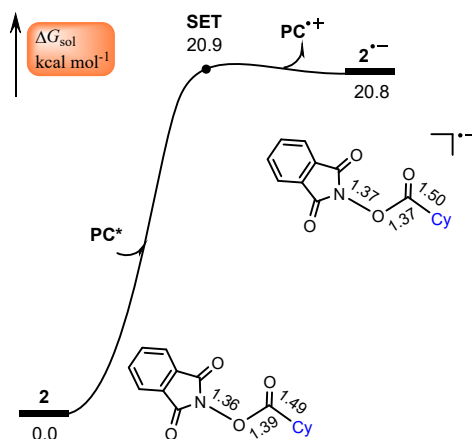

**Fig. S1.** Calculated Gibbs free energy profile for the oxidative quenching of photoexcited high-energy species PC\* with NHP ester **2**. Bond distances are in Å.

### IV. Frontier Molecular Orbital Analyses for Two Quenching Processes of PC\*

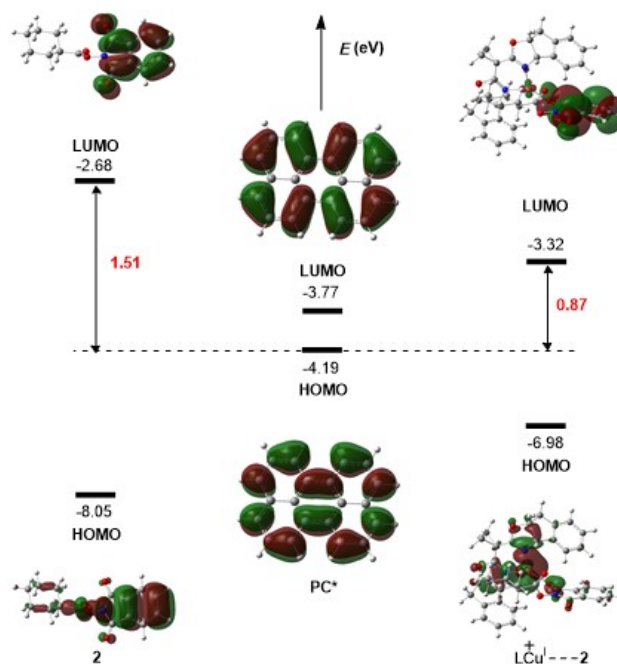

**Fig. S2.** Calculated HOMO–LUMO energy gaps of the electron donor-acceptor pairs involved in the oxidative quenching of photoexcited high-energy species PC\* with NHP ester **2** or its complex (LCu<sup>+</sup>...**2**) with the copper species LCu<sup>+</sup>.

## V. Addition Reactions of Radical Species $LCu(I)^+ \cdots 2^{\bullet-}$ and $2^{\bullet-}$ with Substrate **1**

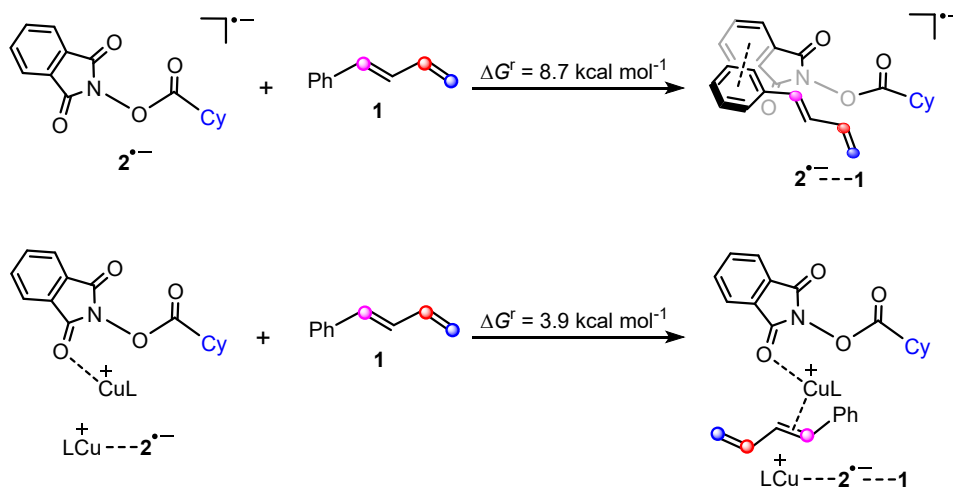

**Fig. S3.** Calculated thermodynamics of the additions of both the radical species  $LCu(I)^+ \cdots 2^{\bullet-}$  and  $2^{\bullet-}$  to 1-phenyl-1,3-diene (**1**).

## VI. Spin Densities Analyses

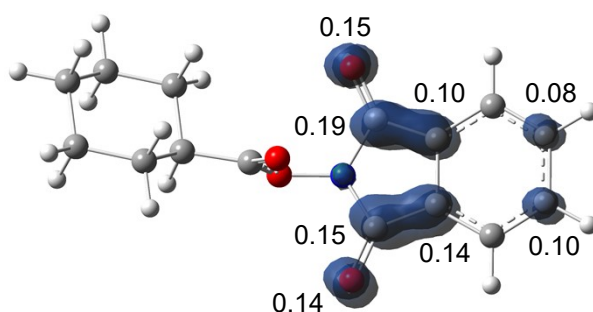

**Fig. S4.** Calculated total spin isosurface and spin densities on atoms for intermediate  $2^{\bullet-}$ .



## VII. Addition Reactions of Radical Cy<sup>•</sup> with 1-Phenyl-1,3-Diene (**1**)

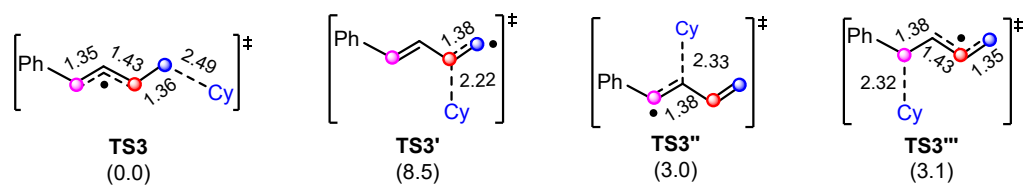

**Fig. S5.** Calculated relative Gibbs free energies of transition states for the additions of radical Cy<sup>•</sup> to 1-phenyl-1,3-diene (**1**) at four different C atoms. The relative Gibbs energies in parenthesis are in kcal/mol<sup>-1</sup>, and bond distances are in Å.

## VIII. Distortion–Interaction Analyses

**Table S3.** Distortion–Interaction Analyses for Key Transition States<sup>a</sup>

| Transition states       | $\Delta E^\ddagger$ <sup>b</sup> | $\Delta E_{\text{cat}}$ <sup>c</sup> | $\Delta E_{\text{sub}}$ <sup>c</sup> | $\Delta E_{\text{dist}}$ <sup>d</sup> | $\Delta E_{\text{int}}$ <sup>e</sup> |
|-------------------------|----------------------------------|--------------------------------------|--------------------------------------|---------------------------------------|--------------------------------------|
| <b>TS9<sub>S</sub></b>  | 0.0                              | 6.6                                  | 8.9                                  | 15.5                                  | -15.5                                |
| <b>TS9<sub>R</sub></b>  | 2.2                              | 7.1                                  | 8.4                                  | 15.5                                  | -13.3                                |
| <b>TS10<sub>S</sub></b> | 3.1                              | 7.4                                  | 10.8                                 | 18.2                                  | -15.0                                |
| <b>TS10<sub>R</sub></b> | 7.3                              | 7.4                                  | 12.2                                 | 19.6                                  | -12.3                                |

<sup>a</sup>All electronic energies are given in kcal mol<sup>-1</sup>. <sup>b</sup>The activation energy  $\Delta E^\ddagger$ . <sup>c</sup>The distortion energy of copper(I) fragment,  $\Delta E_{\text{cat}}$ , or and allyl cation fragment,  $\Delta E_{\text{sub}}$ , which describes the energy needed to distort the fragment from its geometry in the initial reactive complex to the corresponding geometry in the transition state. <sup>d</sup>The total distortion energy,  $\Delta E_{\text{dist}} = \Delta E_{\text{cat}} + \Delta E_{\text{sub}}$ . <sup>e</sup>The interaction energy  $\Delta E_{\text{int}} = \Delta E^\ddagger - \Delta E_{\text{dist}}$ .

## IX. Non-Covalent Interaction Analyses

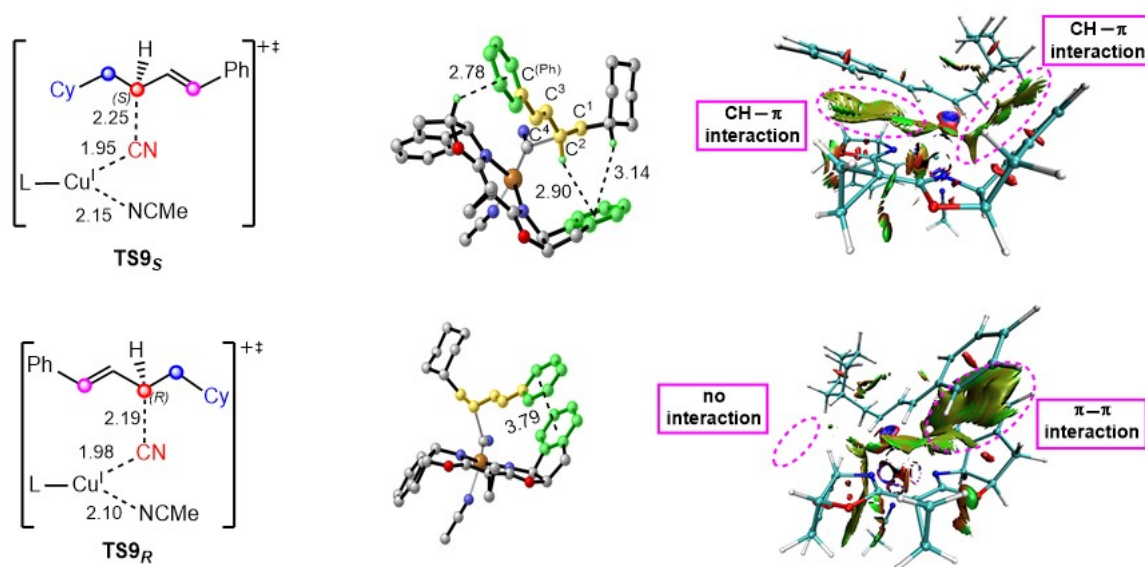

**Fig. S6.** Non-covalent interactions (NCIs) analyses for  $TS9_S$  and  $TS9_R$ . The blue, green, and red surfaces represent the locations where the strong interaction, weak interaction, and steric effect occur, respectively. The bond distances are in Å.

## X. Formation of the Copper(II) Species

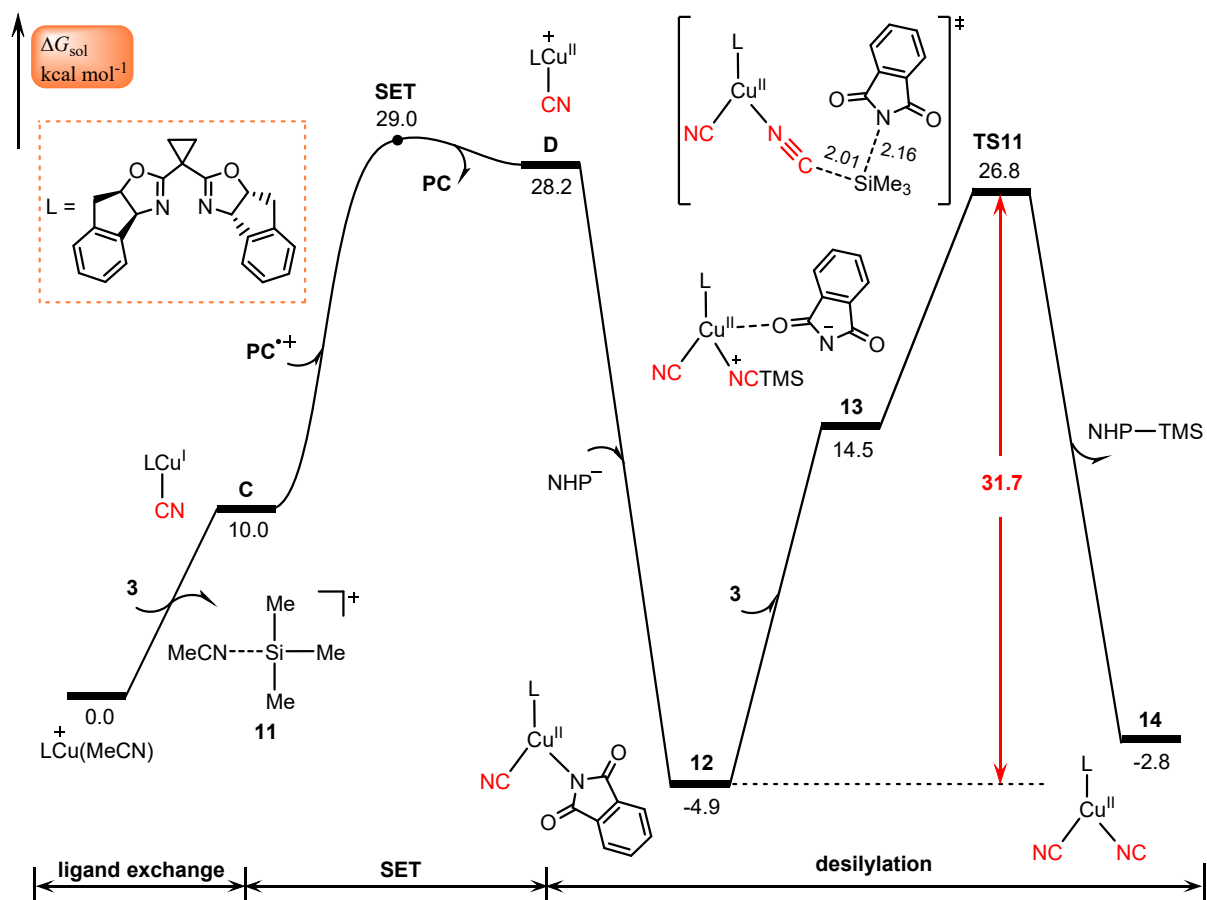

**Fig. S7.** Calculated Gibbs free energy profile for the formation of the copper(II) species.

Bond distances are in Å.

## XI. Extended Application of the Proposed Mechanism

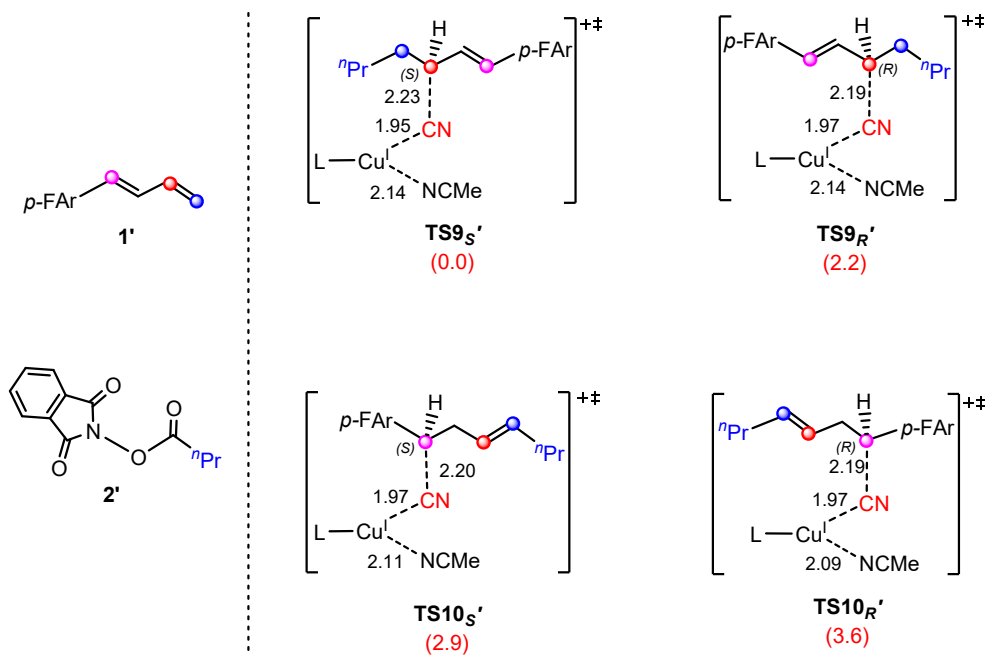

**Fig. S8.** Calculated relative Gibbs energies of the transition states involved in the regio- and enantioselectivity-determining transition states for the reaction of *p*-phenylmethyl-substituted 1,3-diene (**1'**) with *n*-propyl-substituted *N*-hydroxyphthalimide (NHP) ester (**2'**). Bond distances are in Å.

## XII. Thermodynamic Data

**Table S4.** Calculated Key Structures of Zero-Point Energy (*ZPE*) Corrections, Thermal Corrections to Enthalpies (*TCH*), Thermal Corrections to Gibbs Free Energies (*TCG*), Enthalpies (*H*), and Gibbs Free Energies (*G*), Electronic Energies (*E*) in 1,2-Dichloroethane (DCE) and the Imaginary Frequencies (*IF*,  $\text{cm}^{-1}$ ) of the Transition States. All Energies are Given in Hartree

| Structures                                  | <i>ZPE</i><br>(1) | <i>TCH</i><br>(2) | <i>TCG</i><br>(3) | <i>E</i> (DCE)<br>(4) | <i>H</i> (DCE)<br>(5)=(2)+(4) | <i>G</i> (DCE)<br>(6)=(3)+(4) | <i>IF</i> |
|---------------------------------------------|-------------------|-------------------|-------------------|-----------------------|-------------------------------|-------------------------------|-----------|
| <b>1</b>                                    | 0.166285          | 0.17623           | 0.131546          | -386.834              | -386.657                      | -386.702                      |           |
| <b>2</b>                                    | 0.280521          | 0.297908          | 0.235668          | -935.926              | -935.628                      | -935.69                       |           |
| <b>3</b>                                    | 0.118651          | 0.12931           | 0.084783          | -502.014              | -501.885                      | -501.929                      |           |
| <b>L</b>                                    | 0.382179          | 0.403137          | 0.330758          | -1147.89              | -1147.49                      | -1147.56                      |           |
| <b>MeCN</b>                                 | 0.045308          | 0.049803          | 0.022378          | -132.701              | -132.651                      | -132.679                      |           |
| <b>Cu(MeCN)<sub>4</sub><sup>+</sup></b>     | 0.185889          | 0.208231          | 0.125713          | -726.933              | -726.725                      | -726.807                      |           |
| <b>LCu(MeCN)<sub>4</sub><sup>+</sup></b>    | 0.574319          | 0.61562           | 0.501255          | -1874.87              | -1874.26                      | -1874.37                      |           |
| <b>LCu(MeCN)<sub>3</sub><sup>+</sup></b>    | 0.526586          | 0.563527          | 0.456345          | -1742.15              | -1741.59                      | -1741.7                       |           |
| <b>LCu(MeCN)<sub>2</sub><sup>+</sup></b>    | 0.477457          | 0.510426          | 0.410808          | -1609.44              | -1608.93                      | -1609.03                      |           |
| <b>LCu(MeCN)<sup>+</sup></b>                | 0.431664          | 0.459341          | 0.371256          | -1476.73              | -1476.27                      | -1476.36                      |           |
| <b>B</b>                                    | 0.384259          | 0.407017          | 0.329103          | -1343.98              | -1343.58                      | -1343.65                      |           |
| <b>Cu(MeCN)<sup>+</sup>...2</b>             | 0.329482          | 0.353167          | 0.276584          | -1264.71              | -1264.36                      | -1264.43                      |           |
| <b>Cu(MeCN)<sub>2</sub><sup>+</sup>...2</b> | 0.376758          | 0.405238          | 0.318246          | -1397.44              | -1397.04                      | -1397.12                      |           |
| <b>LCu<sup>+</sup>...2</b>                  | 0.667845          | 0.708006          | 0.597056          | -2279.95              | -2279.25                      | -2279.36                      |           |
| <b>LCu<sup>+</sup>...2<sup>-</sup></b>      | 0.664425          | 0.705053          | 0.591622          | -2280.09              | -2279.38                      | -2279.5                       |           |
| <b>2<sup>-</sup></b>                        | 0.2778            | 0.295398          | 0.231848          | -936.038              | -935.742                      | -935.806                      |           |
| <b>TS1</b>                                  | 0.274584          | 0.292172          | 0.228746          | -936.009              | -935.717                      | -935.78                       | -2009.94  |
| <b>6</b>                                    | 0.27595           | 0.294389          | 0.228399          | -936.055              | -935.761                      | -935.827                      |           |
| <b>TS2</b>                                  | 0.273067          | 0.291582          | 0.22508           | -936.048              | -935.757                      | -935.823                      | -618.83   |
| <b>Cy<sup>*</sup></b>                       | 0.154798          | 0.16177           | 0.125146          | -235.077              | -234.915                      | -234.952                      |           |
| <b>TS3</b>                                  | 0.322417          | 0.338855          | 0.277512          | -621.914              | -621.575                      | -621.636                      | -239.23   |
| <b>A</b>                                    | 0.326687          | 0.342549          | 0.28247           | -621.977              | -621.634                      | -621.694                      |           |
| <b>PC</b>                                   | 0.253896          | 0.267868          | 0.213866          | -768.978              | -768.711                      | -768.765                      |           |
| <b>PC*</b>                                  | 0.250197          | 0.26446           | 0.209819          | -768.924              | -768.66                       | -768.714                      |           |
| <b>PC<sup>+</sup></b>                       | 0.254487          | 0.268377          | 0.215023          | -768.781              | -768.513                      | -768.566                      |           |
| <b>CO<sub>2</sub></b>                       | 0.011904          | 0.015467          | -0.0088           | -188.561              | -188.546                      | -188.57                       |           |
| <b>NHP<sup>-</sup></b>                      | 0.103176          | 0.111679          | 0.070525          | -512.428              | -512.316                      | -512.357                      |           |
| <b>TS3'</b>                                 | 0.322894          | 0.33895           | 0.279329          | -621.902              | -621.563                      | -621.623                      | -516.77   |

|                                                        |          |          |          |          |          |          |         |
|--------------------------------------------------------|----------|----------|----------|----------|----------|----------|---------|
| <b>TS3''</b>                                           | 0.322451 | 0.338685 | 0.278799 | -621.91  | -621.572 | -621.632 | -408.38 |
| <b>TS3'''</b>                                          | 0.322663 | 0.338846 | 0.279729 | -621.911 | -621.572 | -621.631 | -447.62 |
| <b>7</b>                                               | 0.611134 | 0.65324  | 0.537898 | -2358.5  | -2357.85 | -2357.97 |         |
| <b>TS4</b>                                             | 0.611517 | 0.652168 | 0.542429 | -2358.49 | -2357.83 | -2357.94 | -82.55  |
| <b>8</b>                                               | 0.391102 | 0.417026 | 0.334031 | -1436.97 | -1436.55 | -1436.63 |         |
| <b>TS5</b>                                             | 0.390456 | 0.415898 | 0.333351 | -1436.96 | -1436.54 | -1436.62 | -151.3  |
| <b>C</b>                                               | 0.391621 | 0.417343 | 0.333731 | -1436.98 | -1436.57 | -1436.65 |         |
| <b>D</b>                                               | 0.392922 | 0.418015 | 0.337886 | -1436.76 | -1436.34 | -1436.42 |         |
| <b>E</b>                                               | 0.724593 | 0.765718 | 0.651263 | -2058.81 | -2058.04 | -2058.16 |         |
| <b>A<sup>+</sup></b>                                   | 0.329389 | 0.345204 | 0.285823 | -621.799 | -621.454 | -621.513 |         |
| <b>A<sup>-</sup></b>                                   | 0.324832 | 0.340691 | 0.281672 | -622.079 | -621.739 | -621.798 |         |
| <b>9</b>                                               | 0.391916 | 0.417492 | 0.334916 | -1436.75 | -1436.33 | -1436.41 |         |
| <b>TS6</b>                                             | 0.39123  | 0.416349 | 0.335239 | -1436.73 | -1436.32 | -1436.4  | -211.13 |
| <b>TS7<sub>S</sub></b>                                 | 0.721428 | 0.761744 | 0.64848  | -2058.93 | -2058.17 | -2058.29 | -372.36 |
| <b>TS8<sub>S</sub></b>                                 | 0.720657 | 0.761457 | 0.645896 | -2058.73 | -2057.97 | -2058.08 | -355.24 |
| <b>NHP-TMS</b>                                         | 0.21695  | 0.233568 | 0.174146 | -921.534 | -921.3   | -921.359 |         |
| <b>10</b>                                              | 0.393835 | 0.418209 | 0.341663 | -1436.48 | -1436.07 | -1436.14 |         |
| <b>TS9<sub>S</sub></b>                                 | 0.770916 | 0.81645  | 0.692062 | -2191.5  | -2190.69 | -2190.81 | -313.75 |
| <b>TS9<sub>R</sub></b>                                 | 0.770066 | 0.815565 | 0.691418 | -2191.5  | -2190.68 | -2190.81 | -372.79 |
| <b>TS9<sub>S</sub><sup>Z</sup></b>                     | 0.771659 | 0.816604 | 0.694873 | -2191.5  | -2190.68 | -2190.8  | -322.37 |
| <b>TS10<sub>S</sub></b>                                | 0.770577 | 0.815528 | 0.691624 | -2191.5  | -2190.68 | -2190.81 | -362.91 |
| <b>TS10<sub>R</sub></b>                                | 0.769734 | 0.815555 | 0.689999 | -2191.49 | -2190.68 | -2190.8  | -374.4  |
| <b>4<sub>S</sub></b>                                   | 0.339147 | 0.356782 | 0.293592 | -714.816 | -714.459 | -714.522 |         |
| <b>4<sub>R</sub></b>                                   | 0.339147 | 0.356782 | 0.293592 | -714.816 | -714.459 | -714.522 |         |
| <b>5<sub>S</sub></b>                                   | 0.339242 | 0.356776 | 0.293538 | -714.812 | -714.455 | -714.519 |         |
| <b>5<sub>R</sub></b>                                   | 0.339171 | 0.356694 | 0.29371  | -714.809 | -714.452 | -714.515 |         |
| <b><sup>3</sup>[LCu(MeCN)<sup>+</sup>]<sup>*</sup></b> | 0.424088 | 0.4531   | 0.361356 | -1476.59 | -1476.14 | -1476.23 |         |
| <b>11</b>                                              | 0.158247 | 0.170872 | 0.12101  | -541.742 | -541.571 | -541.621 |         |
| <b>12</b>                                              | 0.497455 | 0.531956 | 0.430039 | -1949.26 | -1948.73 | -1948.83 |         |
| <b>13</b>                                              | 0.619651 | 0.664213 | 0.544029 | -2451.27 | -2450.61 | -2450.73 |         |
| <b>TS11</b>                                            | 0.619305 | 0.662826 | 0.54542  | -2451.26 | -2450.59 | -2450.71 | -87.03  |
| <b>14</b>                                              | 0.400106 | 0.428399 | 0.340014 | -1529.74 | -1529.31 | -1529.4  |         |
| <b>2<sup>+</sup>...1</b>                               | 0.44607  | 0.473934 | 0.388013 | -1322.88 | -1322.41 | -1322.49 |         |
| <b>LCu<sup>+</sup>...2<sup>-</sup>...1</b>             | 0.834382 | 0.884685 | 0.752245 | -2666.94 | -2666.06 | -2666.19 |         |
| <b>TS9<sub>S</sub>'</b>                                | 0.73214  | 0.777933 | 0.651721 | -2114.12 | -2113.35 | -2113.47 | -332.56 |
| <b>TS9<sub>R</sub>'</b>                                | 0.730768 | 0.776035 | 0.652293 | -2114.12 | -2113.35 | -2113.47 | -388.44 |
| <b>TS10<sub>S</sub>'</b>                               | 0.730772 | 0.776866 | 0.650083 | -2114.12 | -2113.34 | -2113.47 | -375.09 |
| <b>TS10<sub>R</sub>'</b>                               | 0.729802 | 0.776339 | 0.647999 | -2114.12 | -2113.34 | -2113.47 | -392.28 |

### XIII. Cartesian Coordinates of all Structures Involved in This Work

#### 1

|   |             |             |             |
|---|-------------|-------------|-------------|
| C | 2.28363700  | 1.39093400  | -0.00020800 |
| C | 0.93315900  | 1.07309000  | -0.00055600 |
| C | 0.51125400  | -0.26620300 | -0.00033100 |
| C | 1.49316500  | -1.26742600 | 0.00016500  |
| C | 2.84586500  | -0.94949900 | 0.00052500  |
| C | 3.24742700  | 0.38267300  | 0.00035400  |
| H | 2.58969600  | 2.43477700  | -0.00041300 |
| H | 0.19622200  | 1.87421200  | -0.00111600 |
| H | 1.18019700  | -2.31093500 | 0.00030000  |
| H | 3.58843300  | -1.74421800 | 0.00093800  |
| H | 4.30458200  | 0.63730100  | 0.00060800  |
| C | -0.89247300 | -0.66229400 | -0.00062400 |
| H | -1.06950900 | -1.74134700 | -0.00148300 |
| C | -1.97020500 | 0.14442600  | 0.00015900  |
| H | -1.85191000 | 1.23060000  | 0.00121900  |
| C | -3.32816400 | -0.35339800 | -0.00023400 |
| H | -3.44489400 | -1.43964000 | -0.00130700 |
| C | -4.41472200 | 0.42923300  | 0.00062600  |
| H | -4.32748700 | 1.51483400  | 0.00170300  |
| H | -5.41899100 | 0.01520300  | 0.00028600  |

#### 2

|   |             |             |             |
|---|-------------|-------------|-------------|
| C | 2.76203800  | 0.77124300  | -0.01667800 |
| C | 2.96612700  | -0.60349600 | -0.15065700 |
| C | 4.18055500  | -1.18737500 | 0.15527400  |
| C | 5.19952600  | -0.34524400 | 0.60742700  |
| C | 4.99520900  | 1.02882900  | 0.74232000  |
| C | 3.76445200  | 1.61132000  | 0.42969800  |
| C | 1.36771400  | 1.08689000  | -0.39973900 |
| C | 1.71334200  | -1.23289100 | -0.62686300 |
| H | 4.32812600  | -2.25895900 | 0.05064000  |
| H | 6.16837100  | -0.76625200 | 0.86225100  |
| H | 5.80865100  | 1.65428000  | 1.09989400  |
| H | 3.59436500  | 2.67951600  | 0.53465700  |
| O | 1.41140300  | -2.39231100 | -0.76191800 |
| O | 0.72916000  | 2.10698600  | -0.31385200 |
| N | 0.87699100  | -0.13277500 | -0.91380200 |
| O | -0.46277300 | -0.29781200 | -1.11393400 |
| C | -1.16394300 | -0.44253800 | 0.08182700  |
| O | -0.60549900 | -0.53070900 | 1.13953600  |
| C | -3.43874300 | -1.07309000 | 0.89221500  |



|   |             |             |             |
|---|-------------|-------------|-------------|
| H | -3.15003700 | -2.12902300 | 0.96654900  |
| C | -2.62883300 | -0.38251100 | -0.19989100 |
| H | -2.81177100 | -0.86326900 | -1.17336200 |
| C | -3.02083400 | 1.10381000  | -0.31896300 |
| H | -2.75768500 | 1.60532400  | 0.62637900  |
| H | -2.43093900 | 1.58332200  | -1.10988700 |
| C | -4.51538700 | 1.23832700  | -0.57961000 |
| H | -4.78687800 | 2.29926400  | -0.64227200 |
| H | -4.74812400 | 0.79405700  | -1.56030600 |
| C | -5.33185900 | 0.53529500  | 0.49923300  |
| H | -6.40399700 | 0.62309500  | 0.28360000  |
| H | -5.16299000 | 1.03825900  | 1.46485600  |
| C | -4.93143300 | -0.93087800 | 0.62292800  |
| H | -5.50312400 | -1.42217600 | 1.41965300  |
| H | -5.18241600 | -1.45575700 | -0.31263500 |
| H | -3.18641000 | -0.60762400 | 1.85681200  |

### 3

|    |             |             |             |
|----|-------------|-------------|-------------|
| C  | -0.84564400 | 1.60013700  | -0.81436900 |
| H  | -0.47158100 | 1.66137500  | -1.84159700 |
| H  | -1.93927500 | 1.66239000  | -0.84698300 |
| H  | -0.47315100 | 2.46696200  | -0.25876600 |
| C  | -0.84617400 | -0.09497100 | 1.79238100  |
| H  | -1.93981600 | -0.09763300 | 1.86194800  |
| H  | -0.47401100 | -1.00983500 | 2.26493300  |
| H  | -0.47234000 | 0.76356200  | 2.35982200  |
| C  | -0.84474100 | -1.50560800 | -0.97848500 |
| H  | -0.47091100 | -1.45911800 | -2.00657100 |
| H  | -0.47097800 | -2.42528100 | -0.51660500 |
| H  | -1.93828000 | -1.56577100 | -1.01740200 |
| Si | -0.32880400 | 0.00015000  | -0.00014600 |
| C  | 1.56325700  | 0.00020700  | 0.00033100  |
| N  | 2.72762900  | 0.00037900  | 0.00058800  |

### L

|   |             |             |             |
|---|-------------|-------------|-------------|
| C | -0.38227700 | 2.57136800  | 0.63325600  |
| C | -0.00004300 | 1.23796200  | 0.00040100  |
| C | 0.38220100  | 2.57222000  | -0.63067100 |
| C | 1.11621700  | 0.48258000  | 0.60917500  |
| O | 1.92671700  | 1.24460200  | 1.39344000  |
| C | 2.68881100  | -0.94197300 | 1.13881500  |
| C | 2.92748100  | 0.36132800  | 1.93983600  |
| H | 2.63032300  | -1.83826400 | 1.76944200  |
| H | 2.73377900  | 0.27646100  | 3.01435100  |

|   |             |             |             |
|---|-------------|-------------|-------------|
| C | -1.11634600 | 0.48332900  | -0.60924900 |
| O | -1.92715200 | 1.24633600  | -1.39224600 |
| C | -2.68905500 | -0.94060500 | -1.14027000 |
| C | -2.92800100 | 0.36370800  | -1.93955100 |
| H | -2.63075600 | -1.83609700 | -1.77205000 |
| H | -2.73455800 | 0.28023600  | -3.01422300 |
| N | -1.41918800 | -0.74058000 | -0.43349700 |
| N | 1.41915400  | -0.74108600 | 0.43190300  |
| C | -4.75400900 | 0.04160600  | -0.42744400 |
| C | -3.85125700 | -0.99235000 | -0.18256400 |
| C | -4.05481400 | -1.88593500 | 0.86249700  |
| C | -5.18435600 | -1.73786600 | 1.66298000  |
| C | -6.09216000 | -0.70576100 | 1.41839500  |
| C | -5.88245200 | 0.19008500  | 0.37286200  |
| C | -4.33590900 | 0.86155400  | -1.61648700 |
| H | -3.33520500 | -2.68002100 | 1.05439400  |
| H | -5.36016200 | -2.42749000 | 2.48550100  |
| H | -6.96997000 | -0.59985400 | 2.05203700  |
| H | -6.59067300 | 0.99592800  | 0.18702500  |
| C | 3.85133000  | -0.99249700 | 0.18142400  |
| C | 4.75395700  | 0.04119800  | 0.42787500  |
| C | 5.88267000  | 0.19069900  | -0.37185600 |
| C | 6.09278400  | -0.70386200 | -1.41840600 |
| C | 5.18511200  | -1.73571100 | -1.66456000 |
| C | 4.05529500  | -1.88480100 | -0.86465300 |
| C | 4.33543100  | 0.85969400  | 1.61776600  |
| H | 6.59079800  | 0.99633700  | -0.18478200 |
| H | 6.97081700  | -0.59715400 | -2.05160400 |
| H | 5.36123700  | -2.42433500 | -2.48785000 |
| H | 3.33579200  | -2.67869000 | -1.05775800 |
| H | 4.33631200  | 1.93990400  | 1.42871800  |
| H | 5.00433300  | 0.68946200  | 2.47177300  |
| H | -5.00503600 | 0.69225100  | -2.47050400 |
| H | -4.33685200 | 1.94154100  | -1.42617400 |
| H | 0.13342400  | 2.82415700  | 1.55384300  |
| H | -1.43771300 | 2.82343900  | 0.59627900  |
| H | 1.43763600  | 2.82424800  | -0.59332900 |
| H | -0.13347800 | 2.82627900  | -1.55091600 |

**MeCN**

|   |             |             |             |
|---|-------------|-------------|-------------|
| C | 0.00000000  | 0.00000000  | -1.17477800 |
| H | -1.02612300 | 0.00000000  | -1.55187700 |
| H | 0.51306100  | 0.88864900  | -1.55187700 |
| H | 0.51306100  | -0.88864900 | -1.55187700 |

|   |            |            |            |
|---|------------|------------|------------|
| C | 0.00000000 | 0.00000000 | 0.27507100 |
| N | 0.00000000 | 0.00000000 | 1.43626700 |

**Cu(MeCN)<sub>4</sub><sup>+</sup>**

|    |             |             |             |
|----|-------------|-------------|-------------|
| C  | -2.79624400 | -3.14141300 | -1.99555300 |
| H  | -2.45920200 | -4.15013600 | -1.74423100 |
| H  | -2.77809000 | -3.01906200 | -3.08150100 |
| H  | -3.82095000 | -3.00995100 | -1.64032700 |
| C  | -1.93027800 | -2.16451500 | -1.37447400 |
| N  | -1.23357700 | -1.38417300 | -0.87800300 |
| C  | 2.31707700  | -1.99542900 | 3.50424800  |
| H  | 3.03458500  | -1.28749000 | 3.92756100  |
| H  | 2.85712400  | -2.87452400 | 3.14216800  |
| H  | 1.61620300  | -2.30225700 | 4.28533400  |
| C  | 1.59965000  | -1.37526100 | 2.41309300  |
| N  | 1.02092100  | -0.87706700 | 1.54256300  |
| C  | -2.56028500 | 3.53193700  | 1.62138800  |
| H  | -3.32862400 | 3.15936500  | 2.30434400  |
| H  | -3.04568600 | 4.05107100  | 0.79065300  |
| H  | -1.92012600 | 4.23747000  | 2.15759400  |
| C  | -1.76841000 | 2.43040000  | 1.12029800  |
| N  | -1.13336000 | 1.54792100  | 0.72117100  |
| C  | 3.05375600  | 1.59638700  | -3.12636700 |
| H  | 3.61264300  | 0.76154400  | -3.55689500 |
| H  | 3.75484800  | 2.27866400  | -2.63832700 |
| H  | 2.53598500  | 2.12994600  | -3.92805900 |
| C  | 2.09706100  | 1.10657900  | -2.16012200 |
| N  | 1.33241500  | 0.71443900  | -1.38368800 |
| Cu | -0.00129200 | 0.00294500  | -0.00164400 |

**LCu(MeCN)<sub>4</sub><sup>+</sup>**

|   |             |             |             |
|---|-------------|-------------|-------------|
| C | 2.22778100  | -3.03013500 | -3.53689000 |
| H | 1.96317300  | -2.45617400 | -4.42968600 |
| H | 2.06454100  | -4.09273400 | -3.73360300 |
| H | 3.28585000  | -2.86621100 | -3.30945300 |
| C | -2.83443900 | 0.70643700  | 2.25370400  |
| H | -3.24616900 | 1.63629100  | 1.84595000  |
| H | -3.55789700 | 0.28897700  | 2.96068800  |
| H | -2.69031500 | -0.00305900 | 1.42823000  |
| C | -1.56917500 | 0.96733400  | 2.91303100  |
| N | -0.54997300 | 1.17671800  | 3.43096000  |
| C | 1.42266500  | -2.59432700 | -2.41783700 |
| N | 0.79532200  | -2.22353800 | -1.51639600 |
| C | 0.45799700  | 3.70123100  | -0.57812200 |

|    |             |             |             |
|----|-------------|-------------|-------------|
| C  | -0.00026200 | 2.35939000  | 0.00021100  |
| C  | -0.45650300 | 3.70357000  | 0.57437900  |
| C  | -1.00186500 | 1.61726400  | -0.78802900 |
| O  | -1.83081000 | 2.38996600  | -1.50423600 |
| C  | -2.27713300 | 0.09903500  | -1.78957000 |
| C  | -2.77373300 | 1.51500900  | -2.16835000 |
| H  | -1.89200100 | -0.48772500 | -2.63483000 |
| H  | -2.71060300 | 1.74117000  | -3.23494800 |
| C  | 1.00079300  | 1.61746800  | 0.78926200  |
| O  | 1.82892400  | 2.39000700  | 1.50654900  |
| C  | 2.27653700  | 0.09904500  | 1.78993500  |
| C  | 2.77276700  | 1.51496700  | 2.16928400  |
| H  | 1.89123500  | -0.48811800 | 2.63484100  |
| H  | 2.71037100  | 1.74034300  | 3.23608600  |
| N  | 1.16821100  | 0.35033700  | 0.85934200  |
| N  | -1.16852300 | 0.35010600  | -0.85924600 |
| Cu | 0.00070800  | -1.11079100 | -0.00069900 |
| C  | 4.47985300  | 0.37085300  | 0.91463500  |
| C  | 3.43757500  | -0.53898300 | 1.08530600  |
| C  | 3.50659100  | -1.82368900 | 0.55911900  |
| C  | 4.63720300  | -2.18863800 | -0.16821800 |
| C  | 5.67916500  | -1.27720400 | -0.35255000 |
| C  | 5.61122400  | 0.00382700  | 0.19242600  |
| C  | 4.18303700  | 1.68398700  | 1.58615400  |
| H  | 2.68633600  | -2.52602300 | 0.70723500  |
| H  | 4.71181000  | -3.18824600 | -0.59106400 |
| H  | 6.55762900  | -1.57317400 | -0.92147400 |
| H  | 6.43083400  | 0.70614700  | 0.05232800  |
| C  | -3.43792100 | -0.53939700 | -1.08486100 |
| C  | -4.48056200 | 0.37003400  | -0.91422700 |
| C  | -5.61172200 | 0.00268000  | -0.19185000 |
| C  | -5.67918100 | -1.27834500 | 0.35319100  |
| C  | -4.63693700 | -2.18943400 | 0.16876100  |
| C  | -3.50647600 | -1.82411100 | -0.55862800 |
| C  | -4.18446500 | 1.68309900  | -1.58616700 |
| H  | -6.43156600 | 0.70472600  | -0.05174900 |
| H  | -6.55749100 | -1.57458800 | 0.92220900  |
| H  | -4.71119000 | -3.18907000 | 0.59159300  |
| H  | -2.68598300 | -2.52615600 | -0.70674800 |
| H  | -4.20408300 | 2.52981300  | -0.88755800 |
| H  | -4.91584300 | 1.90929100  | -2.37128800 |
| H  | 4.91473800  | 1.91135300  | 2.37062700  |
| H  | 4.20141900  | 2.53030300  | 0.88700400  |
| H  | 0.06525600  | 3.93591000  | -1.56246300 |

|   |             |             |             |
|---|-------------|-------------|-------------|
| H | 1.50247100  | 3.94458100  | -0.40862900 |
| H | -1.50065100 | 3.94782200  | 0.40428100  |
| H | -0.06309000 | 3.94156800  | 1.55761100  |
| C | 2.83368600  | 0.70630200  | -2.25333300 |
| H | 3.55642300  | 0.28751600  | -2.96027300 |
| H | 2.68841400  | -0.00270300 | -1.42761900 |
| H | 3.24690800  | 1.63564900  | -1.84596600 |
| C | 1.56869100  | 0.96901000  | -2.91246000 |
| N | 0.54957000  | 1.17957700  | -3.43007700 |
| C | -2.22583700 | -3.02846100 | 3.53682200  |
| H | -3.28395200 | -2.86405800 | 3.30989700  |
| H | -1.96035500 | -2.45395900 | 4.42901000  |
| H | -2.06314000 | -4.09100500 | 3.73427200  |
| C | -1.42120100 | -2.59403200 | 2.41688600  |
| N | -0.79424200 | -2.22434800 | 1.51472500  |

**LCu(MeCN)<sub>3</sub><sup>+</sup>**

|   |             |             |             |
|---|-------------|-------------|-------------|
| C | -0.05615400 | 5.53021600  | -0.64501100 |
| H | 0.35202800  | 5.93334500  | 0.28566100  |
| H | -1.08046900 | 5.89118500  | -0.76950300 |
| H | 0.55022800  | 5.88263300  | -1.48353800 |
| C | -3.34031200 | -1.02017200 | -2.49339800 |
| H | -3.17470800 | -1.80207300 | -1.74453800 |
| H | -3.50729300 | -1.48877800 | -3.46673900 |
| H | -4.23131300 | -0.45000000 | -2.20577500 |
| C | -2.19728600 | -0.13309400 | -2.54781100 |
| N | -1.28404700 | 0.58574100  | -2.57722500 |
| C | -0.04432000 | 4.08591000  | -0.59967800 |
| N | -0.03432700 | 2.92799800  | -0.56436400 |
| C | 0.54147400  | -3.77330000 | 0.47364900  |
| C | 0.17261200  | -2.40706100 | -0.11301400 |
| C | -0.26095500 | -3.72938400 | -0.75712900 |
| C | -0.85884600 | -1.64980300 | 0.62263600  |
| O | -1.71037900 | -2.40740000 | 1.32772000  |
| C | -2.16172900 | -0.11726600 | 1.56683800  |
| C | -2.56566600 | -1.51620900 | 2.09071300  |
| H | -1.84391900 | 0.58148300  | 2.35157800  |
| H | -2.33141800 | -1.69065100 | 3.14427200  |
| C | 1.26356600  | -1.67604300 | -0.78572400 |
| O | 2.27038300  | -2.44364600 | -1.22238300 |
| C | 2.67729200  | -0.16596800 | -1.58761900 |
| C | 3.23449300  | -1.57842600 | -1.88117500 |
| H | 2.55661500  | 0.46371100  | -2.47667900 |
| H | 3.24027200  | -1.85970700 | -2.93741800 |

|    |             |             |             |
|----|-------------|-------------|-------------|
| N  | 1.36033000  | -0.41294500 | -0.98232500 |
| N  | -1.01174400 | -0.37767800 | 0.68660600  |
| Cu | -0.01399100 | 0.99631800  | -0.45893300 |
| C  | 4.66813100  | -0.48805400 | -0.30524500 |
| C  | 3.62857400  | 0.40291700  | -0.56997600 |
| C  | 3.51198200  | 1.60332200  | 0.12255700  |
| C  | 4.45692200  | 1.90286600  | 1.10070900  |
| C  | 5.49645300  | 1.01149200  | 1.37391600  |
| C  | 5.61116200  | -0.18679600 | 0.67279800  |
| C  | 4.59953800  | -1.69127700 | -1.20493900 |
| H  | 2.68455200  | 2.28266000  | -0.08234500 |
| H  | 4.38160800  | 2.83267500  | 1.65966500  |
| H  | 6.22526700  | 1.25615600  | 2.14305100  |
| H  | 6.42464600  | -0.87666100 | 0.88858300  |
| C  | -3.37256300 | 0.36298300  | 0.81527000  |
| C  | -4.41340800 | -0.56097100 | 0.89837800  |
| C  | -5.62342200 | -0.30912800 | 0.25898200  |
| C  | -5.77073100 | 0.87248400  | -0.46477600 |
| C  | -4.72447700 | 1.79474500  | -0.54712100 |
| C  | -3.51563300 | 1.54595100  | 0.09819200  |
| C  | -4.03848100 | -1.74241000 | 1.74919400  |
| H  | -6.44263400 | -1.02265100 | 0.32317200  |
| H  | -6.71215300 | 1.08182200  | -0.96744900 |
| H  | -4.85841600 | 2.71353800  | -1.11283000 |
| H  | -2.69483600 | 2.26070000  | 0.04385700  |
| H  | -4.17231800 | -2.70414300 | 1.23854200  |
| H  | -4.64447400 | -1.78607900 | 2.66239100  |
| H  | 5.39750600  | -1.66675700 | -1.95785100 |
| H  | 4.69700100  | -2.64590000 | -0.67524200 |
| H  | 0.04469400  | -4.02451900 | 1.40498700  |
| H  | 1.58955900  | -4.04287900 | 0.40230000  |
| H  | -1.32126300 | -3.95508500 | -0.69743700 |
| H  | 0.21936600  | -3.96203500 | -1.70284500 |
| C  | 1.96367700  | -0.30508300 | 2.64247200  |
| H  | 1.29807000  | -1.14918500 | 2.85046400  |
| H  | 2.74826300  | -0.27732100 | 3.40382500  |
| H  | 2.43299800  | -0.44116600 | 1.65989900  |
| C  | 1.21466700  | 0.93644800  | 2.64718100  |
| N  | 0.61534300  | 1.93223900  | 2.65146400  |

**LCu(MeCN)<sub>2</sub><sup>+</sup>**

|   |             |             |            |
|---|-------------|-------------|------------|
| C | -2.51086500 | -3.02595900 | 3.13012300 |
| H | -2.39554600 | -2.58910500 | 4.12549200 |
| H | -2.33025800 | -4.10239600 | 3.18888900 |

|    |             |             |             |
|----|-------------|-------------|-------------|
| H  | -3.53336500 | -2.85290400 | 2.77784000  |
| C  | 2.51049200  | -3.02675300 | -3.12975200 |
| H  | 3.53298500  | -2.85367300 | -2.77745800 |
| H  | 2.39521200  | -2.58998000 | -4.12516200 |
| H  | 2.32987100  | -4.10319100 | -3.18843800 |
| C  | 1.58451400  | -2.41355100 | -2.20417100 |
| N  | 0.85926200  | -1.91468000 | -1.45037300 |
| C  | -1.58490200 | -2.41286100 | 2.20445400  |
| N  | -0.85963400 | -1.91408500 | 1.45060900  |
| C  | -0.35465300 | 4.05430600  | 0.64396100  |
| C  | -0.00001300 | 2.71083300  | -0.00008300 |
| C  | 0.35462000  | 4.05427900  | -0.64419200 |
| C  | 1.10723200  | 1.97052000  | 0.63465600  |
| O  | 2.08995500  | 2.74850800  | 1.12070000  |
| C  | 2.46385500  | 0.47172100  | 1.56021500  |
| C  | 3.13558900  | 1.86193700  | 1.57905400  |
| H  | 2.19269100  | 0.08258700  | 2.55101400  |
| H  | 3.43075900  | 2.20555600  | 2.57246100  |
| C  | -1.10724700 | 1.97046400  | -0.63479000 |
| O  | -2.09005400 | 2.74843500  | -1.12069200 |
| C  | -2.46383900 | 0.47165500  | -1.56036200 |
| C  | -3.13562000 | 1.86185800  | -1.57918200 |
| H  | -2.19277000 | 0.08250700  | -2.55118100 |
| H  | -3.43070800 | 2.20552100  | -2.57259900 |
| N  | -1.22239500 | 0.70548000  | -0.80247800 |
| N  | 1.22247500  | 0.70552800  | 0.80221100  |
| Cu | 0.00010900  | -0.75713100 | 0.00000900  |
| C  | -4.46056300 | 0.34536500  | -0.26866100 |
| C  | -3.43419600 | -0.40973300 | -0.83467300 |
| C  | -3.38486500 | -1.78946900 | -0.68487700 |
| C  | -4.38356100 | -2.41643900 | 0.05755900  |
| C  | -5.40920300 | -1.66401600 | 0.63404900  |
| C  | -5.45732700 | -0.28039600 | 0.47231600  |
| C  | -4.30937300 | 1.80783100  | -0.58734300 |
| H  | -2.58052300 | -2.36520400 | -1.14211800 |
| H  | -4.37138300 | -3.49760100 | 0.18030800  |
| H  | -6.18766600 | -2.16619800 | 1.20438700  |
| H  | -6.26707300 | 0.29778400  | 0.91323700  |
| C  | 3.43428700  | -0.40965600 | 0.83462300  |
| C  | 4.46061700  | 0.34547800  | 0.26858700  |
| C  | 5.45745700  | -0.28026800 | -0.47229600 |
| C  | 5.40944600  | -1.66390700 | -0.63391700 |
| C  | 4.38384200  | -2.41636300 | -0.05740600 |
| C  | 3.38506500  | -1.78940700 | 0.68493900  |

|   |             |             |             |
|---|-------------|-------------|-------------|
| C | 4.30926000  | 1.80796400  | 0.58711000  |
| H | 6.26718000  | 0.29793500  | -0.91322900 |
| H | 6.18797400  | -2.16607300 | -1.20417700 |
| H | 4.37177400  | -3.49753900 | -0.18003400 |
| H | 2.58074700  | -2.36516100 | 1.14220300  |
| H | 4.06462100  | 2.39805400  | -0.30642900 |
| H | 5.22392300  | 2.24083000  | 1.00745600  |
| H | -5.22405900 | 2.24049600  | -1.00785000 |
| H | -4.06492700 | 2.39808600  | 0.30613700  |
| H | 0.20211600  | 4.29937400  | 1.54275100  |
| H | -1.41215800 | 4.29699000  | 0.65616900  |
| H | 1.41212400  | 4.29696900  | -0.65641300 |
| H | -0.20214800 | 4.29930200  | -1.54299500 |

**LCu(MeCN)<sup>+</sup>**

|    |             |             |             |
|----|-------------|-------------|-------------|
| C  | 0.00383100  | 5.58898100  | 0.00163400  |
| H  | 0.23245800  | 5.95795100  | 1.00514200  |
| H  | -0.97942800 | 5.96100700  | -0.29883000 |
| H  | 0.75662100  | 5.96348900  | -0.69729700 |
| C  | 0.00295900  | 4.14504800  | 0.00080200  |
| N  | 0.00098700  | 2.98635300  | 0.00046300  |
| C  | 0.35075500  | -3.66777100 | 0.64402800  |
| C  | -0.00064400 | -2.32068100 | -0.00021000 |
| C  | -0.35255500 | -3.66763700 | -0.64444800 |
| C  | -1.11547800 | -1.58228600 | 0.61728100  |
| O  | -2.10352400 | -2.35234700 | 1.08136900  |
| C  | -2.56765300 | -0.07826700 | 1.36533500  |
| C  | -3.06703300 | -1.48968900 | 1.74532700  |
| H  | -2.46395900 | 0.60169100  | 2.21864100  |
| H  | -3.01363300 | -1.72425300 | 2.81180600  |
| C  | 1.11450500  | -1.58275600 | -0.61768200 |
| O  | 2.10232700  | -2.35318700 | -1.08161100 |
| C  | 2.56734700  | -0.07928600 | -1.36557800 |
| C  | 3.06628500  | -1.49090400 | -1.74541300 |
| H  | 2.46400400  | 0.60064700  | -2.21894800 |
| H  | 3.01300600  | -1.72550000 | -2.81189000 |
| N  | 1.24166300  | -0.31263400 | -0.76608200 |
| N  | -1.24213700 | -0.31210900 | 0.76566100  |
| Cu | 0.00014100  | 1.07557100  | -0.00027100 |
| C  | 4.59776000  | -0.52414000 | -0.18492300 |
| C  | 3.56376800  | 0.39769100  | -0.34397700 |
| C  | 3.51564300  | 1.56307000  | 0.41186300  |
| C  | 4.52137000  | 1.79649700  | 1.34567600  |
| C  | 5.55585800  | 0.87397200  | 1.51235000  |



|   |             |             |             |
|---|-------------|-------------|-------------|
| C | 5.60254200  | -0.28923300 | 0.74794100  |
| C | 4.45506200  | -1.67609500 | -1.14099800 |
| H | 2.70461700  | 2.27818700  | 0.27601000  |
| H | 4.50305900  | 2.70137300  | 1.94838300  |
| H | 6.33465900  | 1.06656800  | 2.24655100  |
| H | 6.41231300  | -1.00420200 | 0.88022400  |
| C | -3.56404700 | 0.39896000  | 0.34381500  |
| C | -4.59835200 | -0.52255300 | 0.18493700  |
| C | -5.60309700 | -0.28746800 | -0.74791900 |
| C | -5.55608200 | 0.87560900  | -1.51250400 |
| C | -4.52130300 | 1.79783600  | -1.34599100 |
| C | -3.51562100 | 1.56422100  | -0.41218000 |
| C | -4.45597300 | -1.67442400 | 1.14116100  |
| H | -6.41309100 | -1.00220900 | -0.88006900 |
| H | -6.33484600 | 1.06834200  | -2.24670600 |
| H | -4.50273100 | 2.70261500  | -1.94883600 |
| H | -2.70435300 | 2.27908700  | -0.27641200 |
| H | -4.54980900 | -2.65800100 | 0.66640900  |
| H | -5.21823000 | -1.63207300 | 1.92950300  |
| H | 5.21745900  | -1.63416600 | -1.92922900 |
| H | 4.54844800  | -2.65964300 | -0.66609400 |
| H | -0.20955600 | -3.90731800 | 1.54207900  |
| H | 1.40845400  | -3.90873000 | 0.66217900  |
| H | -1.41034200 | -3.90820400 | -0.66260400 |
| H | 0.20768900  | -3.90738100 | -1.54249100 |

## B

|   |             |             |             |
|---|-------------|-------------|-------------|
| C | 0.59240600  | 0.43180400  | -3.26473400 |
| C | 0.00000000  | 0.00000000  | -1.91300200 |
| C | -0.59240600 | -0.43180400 | -3.26473400 |
| C | 0.78746700  | -1.02931400 | -1.19764100 |
| O | 1.30237000  | -1.97326100 | -1.98470000 |
| C | 1.83144400  | -2.35169800 | 0.26908900  |
| C | 2.10377700  | -2.86691700 | -1.16230000 |
| H | 2.73769500  | -2.12010800 | 0.83963100  |
| H | 3.13642400  | -2.75341500 | -1.50027400 |
| C | -0.78746700 | 1.02931400  | -1.19764100 |
| O | -1.30237000 | 1.97326100  | -1.98470000 |
| C | -1.83144400 | 2.35169800  | 0.26908900  |
| C | -2.10377700 | 2.86691700  | -1.16230000 |
| H | -2.73769500 | 2.12010800  | 0.83963100  |
| H | -3.13642400 | 2.75341500  | -1.50027400 |
| N | -1.06092900 | 1.11475900  | 0.05996600  |
| N | 1.06092900  | -1.11475900 | 0.05996600  |

|    |             |             |             |
|----|-------------|-------------|-------------|
| Cu | 0.00000000  | 0.00000000  | 1.26074600  |
| C  | -0.80005000 | 4.49021600  | 0.02043600  |
| C  | -0.98352200 | 3.42216600  | 0.89647900  |
| C  | -0.38176300 | 3.40459800  | 2.14945600  |
| C  | 0.42241800  | 4.47969700  | 2.51871200  |
| C  | 0.61097800  | 5.55106700  | 1.64358500  |
| C  | 0.00000000  | 5.56579800  | 0.39213600  |
| C  | -1.57733000 | 4.29818300  | -1.25249500 |
| H  | -0.54209000 | 2.56967900  | 2.83222600  |
| H  | 0.90284500  | 4.48769900  | 3.49398300  |
| H  | 1.24033900  | 6.38503200  | 1.94494500  |
| H  | 0.14783600  | 6.40560200  | -0.28392100 |
| C  | 0.98352200  | -3.42216600 | 0.89647900  |
| C  | 0.80005000  | -4.49021600 | 0.02043600  |
| C  | 0.00000000  | -5.56579800 | 0.39213600  |
| C  | -0.61097800 | -5.55106700 | 1.64358500  |
| C  | -0.42241800 | -4.47969700 | 2.51871200  |
| C  | 0.38176300  | -3.40459800 | 2.14945600  |
| C  | 1.57733000  | -4.29818300 | -1.25249500 |
| H  | -0.14783600 | -6.40560200 | -0.28392100 |
| H  | -1.24033900 | -6.38503200 | 1.94494500  |
| H  | -0.90284500 | -4.48769900 | 3.49398300  |
| H  | 0.54209000  | -2.56967900 | 2.83222600  |
| H  | 0.97628200  | -4.43533400 | -2.15884100 |
| H  | 2.41298800  | -5.00580400 | -1.31983700 |
| H  | -2.41298800 | 5.00580400  | -1.31983700 |
| H  | -0.97628200 | 4.43533400  | -2.15884100 |
| H  | 1.55584100  | -0.00703400 | -3.50327500 |
| H  | 0.47574000  | 1.48312300  | -3.50495300 |
| H  | -0.47574000 | -1.48312300 | -3.50495300 |
| H  | -1.55584100 | 0.00703400  | -3.50327500 |

**Cu(MeCN)<sup>+</sup>...2**

|   |            |             |             |
|---|------------|-------------|-------------|
| C | 3.72777700 | -0.70442200 | -0.24420600 |
| C | 3.35640500 | 0.61616300  | 0.03155500  |
| C | 4.27890600 | 1.56297500  | 0.43361800  |
| C | 5.60761800 | 1.14444800  | 0.55240800  |
| C | 5.97932500 | -0.17017500 | 0.27442800  |
| C | 5.03802300 | -1.12200400 | -0.13291800 |
| C | 2.52429100 | -1.46880700 | -0.62602600 |
| C | 1.90853800 | 0.73897200  | -0.16126500 |
| H | 3.98099800 | 2.58480000  | 0.65048800  |
| H | 6.36433700 | 1.85566500  | 0.87044400  |
| H | 7.02053900 | -0.46125200 | 0.37935300  |

|    |             |             |             |
|----|-------------|-------------|-------------|
| H  | 5.31982400  | -2.14890600 | -0.34754800 |
| O  | 1.18938800  | 1.71310400  | 0.06996100  |
| O  | 2.33396200  | -2.63080100 | -0.85160600 |
| N  | 1.49646200  | -0.46732700 | -0.67075000 |
| O  | 0.18446700  | -0.80749300 | -0.78575200 |
| C  | -0.34131100 | -1.30771400 | 0.42563800  |
| O  | 0.31208600  | -1.27877600 | 1.42748900  |
| C  | -2.58126900 | -1.45248000 | 1.46177600  |
| H  | -2.07098800 | -1.76683400 | 2.37873400  |
| C  | -1.73281300 | -1.83196700 | 0.24017600  |
| H  | -1.60405200 | -2.92973100 | 0.24890700  |
| C  | -2.42095600 | -1.44229200 | -1.06854100 |
| H  | -2.50563700 | -0.34460900 | -1.11629600 |
| H  | -1.81931700 | -1.75268800 | -1.92976000 |
| C  | -3.81295600 | -2.06095400 | -1.14067300 |
| H  | -4.30219600 | -1.75936900 | -2.07450500 |
| H  | -3.71595800 | -3.15742200 | -1.17777800 |
| C  | -4.66048700 | -1.67302800 | 0.06434600  |
| H  | -5.65316500 | -2.13481600 | 0.00001300  |
| H  | -4.82044100 | -0.58213600 | 0.05728300  |
| C  | -3.97029800 | -2.06834200 | 1.36403600  |
| H  | -4.57018600 | -1.76829600 | 2.23163800  |
| H  | -3.88131600 | -3.16515500 | 1.40827300  |
| H  | -2.66662700 | -0.35345400 | 1.50188700  |
| Cu | -0.66989300 | 1.93813000  | -0.08832400 |
| C  | -5.03963400 | 2.80298200  | -0.17499700 |
| H  | -5.19067400 | 3.87926100  | -0.29327600 |
| H  | -5.49374400 | 2.47692100  | 0.76477500  |
| H  | -5.51594600 | 2.27750700  | -1.00726400 |
| C  | -3.62888600 | 2.50995200  | -0.15849600 |
| N  | -2.49666300 | 2.27256000  | -0.14494300 |

**Cu(MeCN)<sub>2</sub><sup>+</sup>...2**

|   |            |             |             |
|---|------------|-------------|-------------|
| C | 3.14451900 | -1.49362000 | -0.26673300 |
| C | 2.76798300 | -0.36760800 | -1.00269900 |
| C | 3.69029000 | 0.58418500  | -1.39609800 |
| C | 5.02369700 | 0.36768400  | -1.03622100 |
| C | 5.40144200 | -0.76020600 | -0.30570400 |
| C | 4.46003900 | -1.71329100 | 0.09502900  |
| C | 1.93865900 | -2.30172300 | 0.02639300  |
| C | 1.30437700 | -0.39525600 | -1.20146500 |
| H | 3.38592800 | 1.46145900  | -1.96166700 |
| H | 5.78088700 | 1.09003800  | -1.32877700 |
| H | 6.44647100 | -0.89681500 | -0.04175000 |

|    |             |             |             |
|----|-------------|-------------|-------------|
| H  | 4.74455900  | -2.59068800 | 0.66935200  |
| O  | 0.54540800  | 0.44973400  | -1.63279700 |
| O  | 1.77675400  | -3.27621700 | 0.71247300  |
| N  | 0.91895500  | -1.64472900 | -0.70826900 |
| O  | -0.39334700 | -1.98274600 | -0.55906600 |
| C  | -1.04417300 | -1.24799100 | 0.41631200  |
| O  | -0.46199100 | -0.42966900 | 1.08400900  |
| C  | -3.21005800 | -0.91016500 | 1.59087400  |
| H  | -2.74905500 | -1.20008500 | 2.54273700  |
| C  | -2.49647400 | -1.60227200 | 0.43306900  |
| H  | -2.56024900 | -2.69645000 | 0.55266800  |
| C  | -3.13596400 | -1.24263200 | -0.92264600 |
| H  | -2.96163600 | -0.17183500 | -1.11643900 |
| H  | -2.64097100 | -1.79220700 | -1.73053600 |
| C  | -4.63119200 | -1.53503600 | -0.90906400 |
| H  | -5.07126500 | -1.23278700 | -1.86753500 |
| H  | -4.77916300 | -2.62290600 | -0.82434300 |
| C  | -5.33500700 | -0.84410500 | 0.25222900  |
| H  | -6.40380800 | -1.08986900 | 0.24994800  |
| H  | -5.26585200 | 0.24944500  | 0.12515200  |
| C  | -4.69849100 | -1.23282300 | 1.58114800  |
| H  | -5.19532000 | -0.72164700 | 2.41432200  |
| H  | -4.83810900 | -2.31262300 | 1.74765200  |
| H  | -3.06586700 | 0.17762100  | 1.49205300  |
| Cu | -0.17262900 | 1.87338400  | 0.27674300  |
| C  | 3.96776900  | 2.05858300  | 2.00239000  |
| H  | 4.34288300  | 1.03468600  | 2.09530000  |
| H  | 3.97654700  | 2.53418200  | 2.98670400  |
| H  | 4.61985600  | 2.61900500  | 1.32616100  |
| C  | 2.62361400  | 2.04069600  | 1.47836800  |
| N  | 1.54817500  | 2.02209700  | 1.05168800  |
| C  | -4.25866200 | 2.83058200  | -1.31890000 |
| H  | -4.21190100 | 3.74000700  | -1.92387700 |
| H  | -4.96569000 | 2.98263400  | -0.49849000 |
| H  | -4.60393800 | 2.00276200  | -1.94668100 |
| C  | -2.95173000 | 2.52457800  | -0.79036600 |
| N  | -1.90662600 | 2.26001300  | -0.36912300 |

### LCu<sup>+</sup>...2

|   |            |             |             |
|---|------------|-------------|-------------|
| C | 4.17997100 | -2.33727200 | -0.08603600 |
| C | 3.75183300 | -1.48877200 | -1.11182400 |
| C | 4.63027400 | -0.97517700 | -2.04605500 |
| C | 5.97258300 | -1.34857900 | -1.92954000 |
| C | 6.40170800 | -2.19177500 | -0.90472200 |

|    |             |             |             |
|----|-------------|-------------|-------------|
| C  | 5.50563000  | -2.70110300 | 0.04088000  |
| C  | 3.01710000  | -2.70050400 | 0.75210100  |
| C  | 2.31268000  | -1.23464700 | -0.94627600 |
| H  | 4.28803800  | -0.30570700 | -2.83062200 |
| H  | 6.69649000  | -0.97115700 | -2.64613700 |
| H  | 7.45305200  | -2.45751700 | -0.84093200 |
| H  | 5.83356500  | -3.35443600 | 0.84459200  |
| O  | 1.57768800  | -0.52076900 | -1.61830500 |
| O  | 2.89824700  | -3.42385000 | 1.70412400  |
| N  | 1.95003600  | -1.95504300 | 0.17362500  |
| O  | 0.65688400  | -2.13809100 | 0.55863000  |
| C  | 0.33175300  | -1.48009200 | 1.75191100  |
| O  | 1.10629900  | -0.75217600 | 2.30547700  |
| C  | -1.20916900 | -1.93890600 | 3.65146800  |
| H  | -0.55150900 | -2.73351700 | 4.02495000  |
| C  | -1.07569500 | -1.81509400 | 2.13298600  |
| H  | -1.34892300 | -2.76352600 | 1.64455400  |
| C  | -2.00640800 | -0.71389400 | 1.59459200  |
| H  | -1.66605000 | 0.25577700  | 1.99483400  |
| H  | -1.91662900 | -0.66310500 | 0.50028100  |
| C  | -3.45054000 | -0.96810100 | 2.00469700  |
| H  | -4.08573800 | -0.15188300 | 1.63224800  |
| H  | -3.80336700 | -1.88977900 | 1.51449200  |
| C  | -3.58116300 | -1.10759700 | 3.51661300  |
| H  | -4.62177400 | -1.31788300 | 3.79238700  |
| H  | -3.31505000 | -0.15068600 | 3.99330500  |
| C  | -2.65835400 | -2.20151500 | 4.04186000  |
| H  | -2.73870100 | -2.28439400 | 5.13235200  |
| H  | -2.97500000 | -3.17258900 | 3.62937800  |
| H  | -0.86293600 | -0.99867700 | 4.10652700  |
| Cu | -0.05690600 | 0.47507200  | -1.08652900 |
| C  | -3.68889900 | 3.17267600  | 0.42494100  |
| C  | -2.49221400 | 2.65253700  | -0.38284800 |
| C  | -3.21341700 | 3.96292200  | -0.71877400 |
| C  | -1.19284600 | 2.75776100  | 0.30656300  |
| O  | -1.05008100 | 3.85628100  | 1.06015000  |
| C  | 0.75272200  | 2.38309000  | 1.32797600  |
| C  | 0.31251700  | 3.83930700  | 1.54725500  |
| H  | 0.67335600  | 1.73279500  | 2.21055200  |
| H  | 0.28200100  | 4.14974600  | 2.59308900  |
| C  | -2.75658300 | 1.52833000  | -1.29995900 |
| O  | -4.03722700 | 1.37527300  | -1.64602400 |
| C  | -2.65750700 | -0.24304000 | -2.65129100 |
| C  | -4.12975500 | 0.21160800  | -2.50900500 |

|   |             |             |             |
|---|-------------|-------------|-------------|
| H | -2.27014200 | -0.19687400 | -3.67596700 |
| H | -4.58936100 | 0.55145800  | -3.43937200 |
| N | -1.90716300 | 0.71305700  | -1.81645900 |
| N | -0.22881500 | 1.90586200  | 0.32707600  |
| C | -3.87620700 | -1.98367900 | -1.56207000 |
| C | -2.62749200 | -1.62575800 | -2.06697500 |
| C | -1.52970000 | -2.46949400 | -1.94415000 |
| C | -1.69350900 | -3.68876200 | -1.29163600 |
| C | -2.94184100 | -4.05243400 | -0.78282600 |
| C | -4.04120200 | -3.20695800 | -0.91962200 |
| C | -4.90591300 | -0.91931100 | -1.82251100 |
| H | -0.55668300 | -2.17426200 | -2.33776900 |
| H | -0.84516400 | -4.35903500 | -1.17545400 |
| H | -3.05878900 | -5.00943400 | -0.27956000 |
| H | -5.01283700 | -3.49829800 | -0.52440700 |
| C | 2.15118600  | 2.49485800  | 0.81021700  |
| C | 2.42815200  | 3.80978100  | 0.43353300  |
| C | 3.68267700  | 4.13718300  | -0.06723300 |
| C | 4.64715200  | 3.13578200  | -0.17740800 |
| C | 4.37078500  | 1.82700100  | 0.22065100  |
| C | 3.11341800  | 1.49803500  | 0.72325600  |
| C | 1.24518500  | 4.70601200  | 0.68442200  |
| H | 3.91657900  | 5.16056600  | -0.35411000 |
| H | 5.63533000  | 3.38275800  | -0.55854300 |
| H | 5.14799500  | 1.06675900  | 0.15966300  |
| H | 2.88808700  | 0.49583700  | 1.08786400  |
| H | 0.73550700  | 4.97464100  | -0.25163100 |
| H | 1.51827000  | 5.64531900  | 1.17655100  |
| H | -5.71631100 | -1.28580500 | -2.46376300 |
| H | -5.37715100 | -0.55260500 | -0.90131000 |
| H | -3.45371800 | 3.51718500  | 1.42682100  |
| H | -4.60333200 | 2.59836600  | 0.31875000  |
| H | -2.64265300 | 4.86661000  | -0.53026300 |
| H | -3.79251500 | 3.94928600  | -1.63708700 |

**LCu<sup>+</sup>...2<sup>-</sup>**

|   |            |             |             |
|---|------------|-------------|-------------|
| C | 4.06659700 | -2.45508100 | -0.12554700 |
| C | 3.53500500 | -1.69814000 | -1.21497300 |
| C | 4.39041200 | -1.19789500 | -2.21150400 |
| C | 5.74185800 | -1.46225500 | -2.11358700 |
| C | 6.26852400 | -2.21319000 | -1.03293300 |
| C | 5.43798200 | -2.70733800 | -0.04150600 |
| C | 2.99546900 | -2.83525500 | 0.77099600  |
| C | 2.13189200 | -1.55489300 | -1.03660100 |

|    |             |             |             |
|----|-------------|-------------|-------------|
| H  | 3.98762600  | -0.61309900 | -3.03657500 |
| H  | 6.42052700  | -1.08514600 | -2.87580300 |
| H  | 7.33887700  | -2.40011000 | -0.98635300 |
| H  | 5.83550500  | -3.28136900 | 0.79373500  |
| O  | 1.24244100  | -0.96084400 | -1.72620600 |
| O  | 2.95224300  | -3.48562000 | 1.81460000  |
| N  | 1.86833900  | -2.24532500 | 0.15262500  |
| O  | 0.59386500  | -2.42789600 | 0.61748900  |
| C  | 0.26001400  | -1.60572400 | 1.67360600  |
| O  | 1.02490000  | -0.81349200 | 2.15739000  |
| C  | -1.29703100 | -2.03756600 | 3.57876100  |
| H  | -0.69819600 | -2.89963600 | 3.89905000  |
| C  | -1.16921300 | -1.83658600 | 2.06730700  |
| H  | -1.53691900 | -2.72934800 | 1.53882500  |
| C  | -2.01435500 | -0.63516500 | 1.61643400  |
| H  | -1.61179100 | 0.27546400  | 2.09068500  |
| H  | -1.91916300 | -0.49744700 | 0.52982500  |
| C  | -3.47301200 | -0.82510100 | 2.00779500  |
| H  | -4.06020200 | 0.04454000  | 1.67851000  |
| H  | -3.87568300 | -1.69759900 | 1.46856400  |
| C  | -3.61211700 | -1.04121400 | 3.51052000  |
| H  | -4.66323400 | -1.20141000 | 3.78164900  |
| H  | -3.28482300 | -0.13089200 | 4.03833000  |
| C  | -2.75890700 | -2.21875500 | 3.97120600  |
| H  | -2.83984300 | -2.35266400 | 5.05701600  |
| H  | -3.14209000 | -3.14415000 | 3.51183300  |
| H  | -0.87789500 | -1.15286800 | 4.08183400  |
| Cu | 0.11073500  | 0.40745200  | -0.92482600 |
| C  | -3.43665700 | 3.28943600  | 0.56359500  |
| C  | -2.26187300 | 2.75949300  | -0.26715100 |
| C  | -2.91734100 | 4.11600400  | -0.53633700 |
| C  | -0.95871900 | 2.77379600  | 0.42264500  |
| O  | -0.75348600 | 3.84023600  | 1.21130000  |
| C  | 0.98629800  | 2.27638800  | 1.39046600  |
| C  | 0.60827900  | 3.73622900  | 1.69400800  |
| H  | 0.91571200  | 1.58823200  | 2.24225200  |
| H  | 0.58761600  | 3.98569200  | 2.75652000  |
| C  | -2.56688800 | 1.69326600  | -1.24015500 |
| O  | -3.84232200 | 1.66303500  | -1.65066800 |
| C  | -2.55989700 | -0.04169900 | -2.62057600 |
| C  | -3.95267200 | 0.63043000  | -2.66502400 |
| H  | -2.06988500 | -0.11366700 | -3.59857900 |
| H  | -4.18403000 | 1.13844700  | -3.60516600 |
| N  | -1.76170800 | 0.83117600  | -1.74290000 |

|   |             |             |             |
|---|-------------|-------------|-------------|
| N | -0.04188700 | 1.87482400  | 0.40638900  |
| C | -4.17765600 | -1.56898600 | -1.74428700 |
| C | -2.81792700 | -1.38591400 | -1.99362500 |
| C | -1.88219300 | -2.35399800 | -1.64333100 |
| C | -2.33090100 | -3.51760200 | -1.02287100 |
| C | -3.69097100 | -3.70490100 | -0.76589100 |
| C | -4.62297400 | -2.73468200 | -1.12788100 |
| C | -4.99163200 | -0.41347700 | -2.25742100 |
| H | -0.81960200 | -2.19384600 | -1.83101300 |
| H | -1.61613600 | -4.28597900 | -0.73622400 |
| H | -4.02619600 | -4.61964400 | -0.28197200 |
| H | -5.68283800 | -2.88721200 | -0.93174200 |
| C | 2.36051900  | 2.35554700  | 0.80593100  |
| C | 2.69075700  | 3.67799500  | 0.50912600  |
| C | 3.92407300  | 3.97233500  | -0.06069500 |
| C | 4.80670700  | 2.92705500  | -0.33355100 |
| C | 4.47082400  | 1.60642800  | -0.03189300 |
| C | 3.23887300  | 1.31076100  | 0.54914200  |
| C | 1.57491100  | 4.61676300  | 0.88415900  |
| H | 4.19958300  | 5.00047000  | -0.28894200 |
| H | 5.77464200  | 3.14575200  | -0.77940600 |
| H | 5.17070700  | 0.80055700  | -0.24805300 |
| H | 2.96956700  | 0.28830600  | 0.81468500  |
| H | 1.05848500  | 5.00358600  | -0.00559600 |
| H | 1.92008900  | 5.48763500  | 1.45201500  |
| H | -5.59595000 | -0.70750900 | -3.12513600 |
| H | -5.68742000 | -0.00169200 | -1.51642100 |
| H | -3.19094300 | 3.56837200  | 1.58358700  |
| H | -4.37770400 | 2.76736700  | 0.42432000  |
| H | -2.30769800 | 4.98083300  | -0.29571800 |
| H | -3.49268100 | 4.17678500  | -1.45476200 |

2-

|   |            |             |             |
|---|------------|-------------|-------------|
| C | 2.74305800 | 0.79048000  | -0.02202900 |
| C | 2.96617600 | -0.61849300 | -0.17267600 |
| C | 4.22069100 | -1.16815500 | 0.12861100  |
| C | 5.22922400 | -0.33467000 | 0.57067300  |
| C | 5.00724200 | 1.06292900  | 0.72225500  |
| C | 3.77896500 | 1.62171800  | 0.42996700  |
| C | 1.38455900 | 1.10096800  | -0.36741900 |
| C | 1.75592900 | -1.25541900 | -0.61538400 |
| H | 4.38458300 | -2.23951200 | 0.01572000  |
| H | 6.20789100 | -0.74674500 | 0.80965100  |
| H | 5.82028600 | 1.69461000  | 1.07534500  |



|   |             |             |             |
|---|-------------|-------------|-------------|
| H | 3.60455800  | 2.69078900  | 0.54836500  |
| O | 1.43839800  | -2.43489800 | -0.81046600 |
| O | 0.70420200  | 2.13440000  | -0.32140200 |
| N | 0.89181000  | -0.14945200 | -0.82929600 |
| O | -0.45453600 | -0.32298300 | -1.03677500 |
| C | -1.16944500 | -0.45871000 | 0.12783800  |
| O | -0.65987300 | -0.55624000 | 1.21267600  |
| C | -3.46902500 | -1.03875900 | 0.92125500  |
| H | -3.18736600 | -2.09244600 | 1.04354500  |
| C | -2.63612300 | -0.39682000 | -0.18231800 |
| H | -2.80689300 | -0.91815000 | -1.13763700 |
| C | -3.02448400 | 1.08043400  | -0.37231100 |
| H | -2.76865800 | 1.62527500  | 0.55133200  |
| H | -2.42304400 | 1.52181400  | -1.17596000 |
| C | -4.51477300 | 1.21351400  | -0.65629500 |
| H | -4.78112000 | 2.27205900  | -0.76834300 |
| H | -4.74010800 | 0.72852900  | -1.61972800 |
| C | -5.34839500 | 0.56102100  | 0.44098400  |
| H | -6.41822600 | 0.64691700  | 0.21152500  |
| H | -5.18506800 | 1.10173900  | 1.38721800  |
| C | -4.95769500 | -0.90091500 | 0.62894600  |
| H | -5.54359700 | -1.35665200 | 1.43698400  |
| H | -5.20094400 | -1.46098700 | -0.28849800 |
| H | -3.22592200 | -0.53803600 | 1.87071300  |

### TS1

|   |             |             |             |
|---|-------------|-------------|-------------|
| C | 2.56672600  | -0.67742000 | -0.35292400 |
| C | 2.69990400  | 0.64073500  | 0.14068500  |
| C | 3.89056600  | 1.33870800  | 0.08554200  |
| C | 4.98651300  | 0.72249100  | -0.52889900 |
| C | 4.85202400  | -0.57076900 | -1.06478900 |
| C | 3.65977700  | -1.28058600 | -0.99678700 |
| C | 1.20253600  | -1.12673000 | -0.18810100 |
| C | 1.39698300  | 1.02352500  | 0.69623500  |
| H | 3.95712500  | 2.34574700  | 0.49414400  |
| H | 5.93722800  | 1.24361300  | -0.60788800 |
| H | 5.71525700  | -1.03103300 | -1.54362900 |
| H | 3.57235700  | -2.28236100 | -1.41215600 |
| O | 1.09342700  | 2.00597500  | 1.34599800  |
| O | 0.66501000  | -2.20688100 | -0.49871600 |
| N | 0.49137700  | -0.01324100 | 0.31924500  |
| O | -2.28388600 | -1.04846200 | 2.40954800  |
| C | -1.63759100 | -0.62051300 | 1.46726100  |
| O | -0.34231100 | -0.38487800 | 1.66641700  |

|   |             |             |             |
|---|-------------|-------------|-------------|
| C | -3.61284000 | -0.95860200 | -0.03984600 |
| H | -3.50993000 | -2.04781700 | 0.05086100  |
| C | -2.25402400 | -0.28865800 | 0.12944500  |
| H | -1.57341700 | -0.64029100 | -0.65862500 |
| C | -2.39171400 | 1.23650000  | 0.00386500  |
| H | -3.03162300 | 1.59247300  | 0.82907600  |
| H | -1.41216400 | 1.71368400  | 0.13089400  |
| C | -3.02533800 | 1.61668300  | -1.32901200 |
| H | -3.13276500 | 2.70704200  | -1.39976500 |
| H | -2.34855200 | 1.31389900  | -2.14440500 |
| C | -4.37384700 | 0.93096800  | -1.51604400 |
| H | -4.80725500 | 1.19256500  | -2.49034300 |
| H | -5.07444200 | 1.30216200  | -0.75020900 |
| C | -4.24111500 | -0.58181600 | -1.37669800 |
| H | -5.22053400 | -1.06572700 | -1.48614900 |
| H | -3.60990700 | -0.96460500 | -2.19516100 |
| H | -4.27030200 | -0.63977900 | 0.78307800  |

## 6

|   |             |             |             |
|---|-------------|-------------|-------------|
| C | 2.57583800  | -0.49017300 | -0.62419900 |
| C | 2.68890300  | 0.74055800  | 0.00691500  |
| C | 3.88374800  | 1.16301000  | 0.56319700  |
| C | 4.97584900  | 0.29716200  | 0.47181800  |
| C | 4.86072100  | -0.94421300 | -0.16121000 |
| C | 3.65077300  | -1.35614100 | -0.72413600 |
| C | 1.16512300  | -0.59623100 | -1.11026000 |
| C | 1.34609700  | 1.39369700  | -0.08109400 |
| H | 3.96310900  | 2.13154300  | 1.05220900  |
| H | 5.93286900  | 0.58884500  | 0.89854200  |
| H | 5.73012000  | -1.59574800 | -0.21287800 |
| H | 3.55060700  | -2.31943600 | -1.21980500 |
| O | 1.06448700  | 2.49244600  | 0.37676200  |
| O | 0.69728900  | -1.54739000 | -1.72090500 |
| N | 0.47865900  | 0.56848300  | -0.78646100 |
| O | -1.67630700 | -1.45635600 | 2.37967300  |
| C | -1.29427900 | -0.83314700 | 1.38283400  |
| O | -0.05510000 | -0.47634000 | 1.28320900  |
| C | -3.54250400 | -1.20393000 | 0.29890500  |
| H | -3.34054200 | -2.28071400 | 0.22357300  |
| C | -2.23753400 | -0.41868500 | 0.27372100  |
| H | -1.71320400 | -0.58934300 | -0.67852200 |
| C | -2.51201500 | 1.08630100  | 0.38020500  |
| H | -2.98444800 | 1.28901700  | 1.35712300  |
| H | -1.55998300 | 1.62906600  | 0.35187600  |

|   |             |             |             |
|---|-------------|-------------|-------------|
| C | -3.43558200 | 1.54552800  | -0.74009100 |
| H | -3.63891700 | 2.62117700  | -0.65247700 |
| H | -2.91640800 | 1.40100300  | -1.70232200 |
| C | -4.73814900 | 0.75265100  | -0.74237800 |
| H | -5.38541700 | 1.07232500  | -1.57010600 |
| H | -5.28849200 | 0.96848300  | 0.18836400  |
| C | -4.46969100 | -0.74655000 | -0.82237200 |
| H | -5.41316100 | -1.30780700 | -0.79083900 |
| H | -4.00201900 | -0.97590900 | -1.79386000 |
| H | -4.03145900 | -1.04979400 | 1.27329700  |

## TS2

|   |             |             |             |
|---|-------------|-------------|-------------|
| C | -2.59562800 | 0.72996900  | 0.03054800  |
| C | -2.54125300 | -0.43709400 | -0.71716600 |
| C | -3.62070400 | -1.29708600 | -0.79984600 |
| C | -4.77742400 | -0.94615800 | -0.09739700 |
| C | -4.83252700 | 0.22878300  | 0.65686700  |
| C | -3.73278700 | 1.08911700  | 0.73094100  |
| C | -1.25566300 | 1.39058800  | -0.12496400 |
| C | -1.16670000 | -0.48677100 | -1.32068800 |
| H | -3.56701700 | -2.21012300 | -1.38964400 |
| H | -5.65014800 | -1.59472800 | -0.13390500 |
| H | -5.74640000 | 0.47326700  | 1.19418200  |
| H | -3.76491600 | 2.00532700  | 1.31734900  |
| O | -0.74569500 | -1.40951900 | -2.01422600 |
| O | -0.93375800 | 2.43866900  | 0.42989600  |
| N | -0.47187300 | 0.64930400  | -0.97762900 |
| O | 1.97122500  | -1.21270000 | 2.63407200  |
| C | 1.32835700  | -0.86896200 | 1.64847800  |
| O | 0.09644900  | -0.73629200 | 1.43812400  |
| C | 2.40933700  | 1.05315600  | 0.45067000  |
| H | 1.45402500  | 1.59193400  | 0.49604200  |
| C | 2.15278800  | -0.44125600 | 0.33683800  |
| H | 1.49036300  | -0.62446200 | -0.51792300 |
| C | 3.44198600  | -1.23504400 | 0.24233100  |
| H | 4.03063300  | -1.07239500 | 1.15591800  |
| H | 3.23581700  | -2.31115900 | 0.17910800  |
| C | 4.23382500  | -0.76345800 | -0.97921000 |
| H | 5.16916700  | -1.33366900 | -1.05429600 |
| H | 3.65750900  | -0.98010300 | -1.89217700 |
| C | 4.51361100  | 0.73253600  | -0.90365400 |
| H | 5.06911100  | 1.06296500  | -1.79154500 |
| H | 5.16027000  | 0.93432000  | -0.03430200 |
| C | 3.21914800  | 1.52366300  | -0.75919700 |

|   |            |            |             |
|---|------------|------------|-------------|
| H | 3.42506900 | 2.59843700 | -0.67101800 |
| H | 2.60212100 | 1.39021800 | -1.66111200 |
| H | 2.97353800 | 1.25188400 | 1.37649300  |

**Cy**

|   |             |             |             |
|---|-------------|-------------|-------------|
| C | 1.25571500  | -0.70657900 | -0.24760300 |
| C | 1.27911500  | 0.76922000  | 0.16254000  |
| C | 0.00000100  | 1.45300000  | -0.17528300 |
| C | -1.27911200 | 0.76922200  | 0.16254000  |
| C | -1.25571700 | -0.70657700 | -0.24760300 |
| C | -0.00000100 | -1.39637300 | 0.27325100  |
| H | 1.44610400  | 0.81163600  | 1.25868200  |
| H | 2.13561200  | 1.28587700  | -0.28917900 |
| H | 1.27133700  | -0.77571800 | -1.34631400 |
| H | 2.15859600  | -1.21453900 | 0.11565500  |
| H | -1.44610200 | 0.81163800  | 1.25868200  |
| H | -2.13561000 | 1.28588100  | -0.28917800 |
| H | -2.15859800 | -1.21453500 | 0.11565500  |
| H | -1.27133900 | -0.77571500 | -1.34631400 |
| H | -0.00000100 | -1.36433100 | 1.37571700  |
| H | -0.00000200 | -2.45726400 | -0.00906600 |
| H | 0.00000200  | 2.51559000  | -0.41139300 |

**TS3**

|   |             |             |             |
|---|-------------|-------------|-------------|
| C | -3.24157000 | 0.73141900  | 0.80149700  |
| C | -4.46506400 | 0.26354500  | 0.08534000  |
| C | -4.21150700 | -0.96065300 | -0.79306100 |
| C | -3.43968700 | -2.02981800 | -0.02865700 |
| C | -2.09977200 | -1.48445900 | 0.45151900  |
| C | -2.28977500 | -0.27048900 | 1.36011200  |
| H | -5.16486600 | -1.35742900 | -1.16477000 |
| H | -5.23578400 | -0.00685900 | 0.83496900  |
| H | -4.90584500 | 1.08260100  | -0.50170900 |
| H | -3.31896400 | 1.67944700  | 1.33526500  |
| H | -4.03442600 | -2.35342900 | 0.84204500  |
| H | -3.29132100 | -2.91897600 | -0.65475200 |
| H | -1.52769500 | -2.25943100 | 0.97745000  |
| H | -1.49943600 | -1.19435200 | -0.42581300 |
| H | -2.66910000 | -0.62463000 | 2.33900600  |
| H | -1.32144100 | 0.20876000  | 1.57104400  |
| H | -3.63001600 | -0.66625800 | -1.68099500 |
| C | 3.78898400  | -1.66599800 | -0.56802500 |
| C | 2.67661500  | -0.83806500 | -0.52968600 |
| C | 2.75983600  | 0.45715100  | 0.01081700  |

|   |             |             |             |
|---|-------------|-------------|-------------|
| C | 3.99847300  | 0.87550700  | 0.52323300  |
| C | 5.11207800  | 0.04556200  | 0.48539900  |
| C | 5.01432900  | -1.22983700 | -0.06399600 |
| H | 3.70000700  | -2.66470900 | -0.99038900 |
| H | 1.72609000  | -1.20573200 | -0.91304900 |
| H | 4.07889600  | 1.87417200  | 0.95161100  |
| H | 6.06056800  | 0.39688300  | 0.88592200  |
| H | 5.88337100  | -1.88268700 | -0.09448200 |
| C | 1.62733800  | 1.36840500  | 0.06303200  |
| H | 1.79538500  | 2.29895700  | 0.61216700  |
| C | 0.41196400  | 1.18269400  | -0.50639400 |
| H | 0.21931000  | 0.27509600  | -1.08573500 |
| C | -0.67541400 | 2.11078700  | -0.41498000 |
| H | -0.50151600 | 3.02162400  | 0.16275100  |
| C | -1.90146200 | 1.88359100  | -0.95380600 |
| H | -2.68363300 | 2.63702000  | -0.93397000 |
| H | -2.07178700 | 1.02389500  | -1.60062600 |

## A

|   |             |             |             |
|---|-------------|-------------|-------------|
| C | -4.65999100 | 0.89719400  | 1.31034500  |
| C | -3.41578800 | 0.36614800  | 1.01184500  |
| C | -3.16899100 | -0.24810600 | -0.23724700 |
| C | -4.23664400 | -0.29918700 | -1.16120500 |
| C | -5.47908800 | 0.23357200  | -0.85717700 |
| C | -5.70078300 | 0.83686900  | 0.38140500  |
| H | -4.82439600 | 1.36506100  | 2.27879300  |
| H | -2.62050700 | 0.42563100  | 1.75190000  |
| H | -4.06638500 | -0.76845300 | -2.12971300 |
| H | -6.28251200 | 0.18002600  | -1.58867200 |
| H | -6.67491600 | 1.25608900  | 0.62141100  |
| C | -1.90226800 | -0.80886000 | -0.60195600 |
| H | -1.84037300 | -1.25699200 | -1.59709000 |
| C | -0.73823200 | -0.83583200 | 0.18033700  |
| H | -0.76491100 | -0.39595400 | 1.18139900  |
| C | 0.44784300  | -1.38361100 | -0.23108700 |
| H | 0.49789200  | -1.81852900 | -1.23462000 |
| C | 1.69904800  | -1.40430100 | 0.57407300  |
| H | 1.50896600  | -0.98028900 | 1.57372600  |
| H | 2.02588300  | -2.44570300 | 0.73299300  |
| C | 3.68639400  | 1.62150200  | -0.85298100 |
| C | 2.53050600  | 0.84785900  | -0.22996200 |
| C | 2.85387800  | -0.63735300 | -0.08074000 |
| C | 4.14822900  | -0.81878200 | 0.70859500  |
| C | 5.30770200  | -0.05116500 | 0.08430000  |

|   |            |             |             |
|---|------------|-------------|-------------|
| C | 4.97249400 | 1.42962300  | -0.05661600 |
| H | 2.31311800 | 1.25653900  | 0.77323800  |
| H | 1.61261200 | 0.97576900  | -0.82028600 |
| H | 3.84475700 | 1.26206600  | -1.88290000 |
| H | 3.43525800 | 2.68735800  | -0.93071600 |
| H | 3.98247600 | -0.45477500 | 1.73780500  |
| H | 4.38980000 | -1.88819300 | 0.79191300  |
| H | 6.22082200 | -0.18665100 | 0.67840200  |
| H | 5.51888400 | -0.46868000 | -0.91366200 |
| H | 4.84357700 | 1.86672000  | 0.94714900  |
| H | 5.80326900 | 1.96988500  | -0.52900400 |
| H | 3.01082600 | -1.05435700 | -1.09362600 |

**PC**

|   |             |             |             |
|---|-------------|-------------|-------------|
| C | 0.73490400  | -1.24574500 | 0.00004900  |
| C | 1.43339500  | -0.00003200 | 0.00000100  |
| C | 3.56164300  | -1.22865400 | 0.00011100  |
| C | 2.87455100  | -2.41597900 | 0.00021800  |
| C | 1.47090400  | -2.42031400 | 0.00018500  |
| C | -0.73490400 | -1.24574500 | -0.00004900 |
| C | -3.56164200 | -1.22865400 | -0.00011100 |
| C | -2.87455100 | -2.41597900 | -0.00021700 |
| C | -1.47090400 | -2.42031400 | -0.00018400 |
| H | 4.64998800  | -1.20936600 | 0.00012400  |
| H | 3.41029500  | -3.36213900 | 0.00032300  |
| H | 0.96468300  | -3.38171600 | 0.00028400  |
| H | -4.64998800 | -1.20936700 | -0.00012300 |
| H | -3.41029500 | -3.36213900 | -0.00032200 |
| H | -0.96468200 | -3.38171600 | -0.00028200 |
| C | 2.86087700  | 0.00001600  | 0.00000200  |
| C | -0.73487800 | 1.24565400  | 0.00004800  |
| C | -1.43339500 | -0.00003200 | -0.00000100 |
| C | -3.56157000 | 1.22873400  | 0.00010600  |
| C | -2.87441400 | 2.41602600  | 0.00021200  |
| C | -1.47076900 | 2.42027100  | 0.00018100  |
| C | 0.73487800  | 1.24565400  | -0.00004900 |
| C | 3.56157000  | 1.22873400  | -0.00010600 |
| C | 2.87441400  | 2.41602600  | -0.00021300 |
| C | 1.47076900  | 2.42027100  | -0.00018200 |
| H | -4.64991700 | 1.20951100  | 0.00011700  |
| H | -3.41009700 | 3.36222000  | 0.00031500  |
| H | -0.96443300 | 3.38162600  | 0.00027900  |
| H | 4.64991700  | 1.20951200  | -0.00011700 |
| H | 3.41009800  | 3.36222000  | -0.00031700 |

|   |             |            |             |
|---|-------------|------------|-------------|
| H | 0.96443300  | 3.38162600 | -0.00028000 |
| C | -2.86087700 | 0.00001600 | -0.00000200 |

**PC\***

|   |             |             |             |
|---|-------------|-------------|-------------|
| C | 0.00002200  | 0.71147400  | -1.23947800 |
| C | 0.00000000  | 1.41248600  | 0.00000000  |
| C | 0.00004600  | 3.54227700  | -1.22633600 |
| C | 0.00009900  | 2.84609600  | -2.43860700 |
| C | 0.00008700  | 1.47036400  | -2.45501600 |
| C | -0.00002200 | -0.71147400 | -1.23947800 |
| C | -0.00004600 | -3.54227700 | -1.22633600 |
| C | -0.00009900 | -2.84609600 | -2.43860700 |
| C | -0.00008700 | -1.47036400 | -2.45501600 |
| H | 0.00004900  | 4.63062800  | -1.21223200 |
| H | 0.00015400  | 3.39639800  | -3.37655900 |
| H | 0.00015600  | 0.95887600  | -3.41213100 |
| H | -0.00004900 | -4.63062800 | -1.21223200 |
| H | -0.00015400 | -3.39639800 | -3.37655900 |
| H | -0.00015600 | -0.95887600 | -3.41213100 |
| C | 0.00000000  | 2.84762200  | 0.00000000  |
| C | 0.00002100  | -0.71147400 | 1.23947900  |
| C | 0.00000000  | -1.41248600 | 0.00000000  |
| C | 0.00004500  | -3.54227800 | 1.22633500  |
| C | 0.00009800  | -2.84609800 | 2.43860600  |
| C | 0.00008600  | -1.47036600 | 2.45501700  |
| C | -0.00002100 | 0.71147400  | 1.23947900  |
| C | -0.00004500 | 3.54227800  | 1.22633500  |
| C | -0.00009800 | 2.84609800  | 2.43860600  |
| C | -0.00008600 | 1.47036600  | 2.45501700  |
| H | 0.00004700  | -4.63062900 | 1.21223000  |
| H | 0.00015100  | -3.39640100 | 3.37655800  |
| H | 0.00015600  | -0.95888000 | 3.41213300  |
| H | -0.00004700 | 4.63062900  | 1.21223000  |
| H | -0.00015100 | 3.39640100  | 3.37655800  |
| H | -0.00015600 | 0.95888000  | 3.41213300  |
| C | 0.00000000  | -2.84762200 | 0.00000000  |

**PC<sup>+</sup>**

|   |             |             |             |
|---|-------------|-------------|-------------|
| C | 0.72231400  | -1.23988100 | 0.00859100  |
| C | 1.41967600  | -0.00000100 | 0.00000100  |
| C | 3.54441900  | -1.22363500 | 0.02149500  |
| C | 2.85726400  | -2.42533200 | 0.04145900  |
| C | 1.46834700  | -2.43179200 | 0.03427300  |
| C | -0.72231400 | -1.23988100 | -0.00859000 |

|   |             |             |             |
|---|-------------|-------------|-------------|
| C | -3.54441900 | -1.22363500 | -0.02149500 |
| C | -2.85726400 | -2.42533200 | -0.04145800 |
| C | -1.46834700 | -2.43179200 | -0.03427300 |
| H | 4.63189200  | -1.20750300 | 0.02494500  |
| H | 3.39942500  | -3.36563500 | 0.06222000  |
| H | 0.96113700  | -3.39102900 | 0.05369600  |
| H | -4.63189200 | -1.20750300 | -0.02494500 |
| H | -3.39942500 | -3.36563500 | -0.06221900 |
| H | -0.96113700 | -3.39102900 | -0.05369400 |
| C | 2.84461000  | 0.00000000  | 0.00000200  |
| C | -0.72231300 | 1.23987800  | 0.00858900  |
| C | -1.41967600 | -0.00000100 | -0.00000100 |
| C | -3.54441700 | 1.22363700  | 0.02148900  |
| C | -2.85726000 | 2.42533300  | 0.04145400  |
| C | -1.46834300 | 2.43179100  | 0.03427100  |
| C | 0.72231300  | 1.23987800  | -0.00859000 |
| C | 3.54441700  | 1.22363700  | -0.02148900 |
| C | 2.85726000  | 2.42533300  | -0.04145400 |
| C | 1.46834300  | 2.43179100  | -0.03427100 |
| H | -4.63189100 | 1.20750700  | 0.02493700  |
| H | -3.39942000 | 3.36563700  | 0.06221400  |
| H | -0.96113100 | 3.39102600  | 0.05369400  |
| H | 4.63189100  | 1.20750700  | -0.02493700 |
| H | 3.39942000  | 3.36563700  | -0.06221500 |
| H | 0.96113100  | 3.39102700  | -0.05369500 |
| C | -2.84461000 | 0.00000000  | -0.00000200 |

## CO<sub>2</sub>

|   |            |            |             |
|---|------------|------------|-------------|
| C | 0.00000000 | 0.00000000 | 0.00000000  |
| O | 0.00000000 | 0.00000000 | 1.16475800  |
| O | 0.00000000 | 0.00000000 | -1.16475800 |

## NHP-

|   |             |             |             |
|---|-------------|-------------|-------------|
| C | 0.14112100  | 0.69245000  | 0.00005500  |
| C | 0.14112100  | -0.69245000 | 0.00010300  |
| C | 1.31797000  | -1.41733700 | 0.00003300  |
| C | 2.51897500  | -0.69800000 | -0.00001000 |
| C | 2.51897500  | 0.69800100  | -0.00000200 |
| C | 1.31797100  | 1.41733700  | 0.00002500  |
| C | -1.31131400 | 1.10597100  | -0.00010800 |
| C | -1.31131400 | -1.10597200 | 0.00038100  |
| H | 1.30666500  | -2.50602700 | 0.00008800  |
| H | 3.46846600  | -1.23006400 | -0.00002900 |
| H | 3.46846600  | 1.23006200  | -0.00004500 |



|   |             |             |             |
|---|-------------|-------------|-------------|
| H | 1.30666500  | 2.50602700  | -0.00003400 |
| O | -1.67297400 | -2.28466500 | -0.00039600 |
| O | -1.67297500 | 2.28466500  | 0.00009200  |
| N | -2.11195700 | 0.00000000  | -0.00005900 |

**TS3'**

|   |             |             |             |
|---|-------------|-------------|-------------|
| C | -2.69539500 | 0.36688600  | 0.87405100  |
| C | -3.60703700 | -0.19147200 | -0.17370100 |
| C | -2.93510500 | -1.24759600 | -1.04345800 |
| C | -2.29153500 | -2.32131800 | -0.17505100 |
| C | -1.22988500 | -1.70720400 | 0.72899300  |
| C | -1.80333900 | -0.59172500 | 1.60302100  |
| H | -3.66552800 | -1.68656300 | -1.73505000 |
| H | -4.47256300 | -0.65842600 | 0.33373500  |
| H | -4.01835400 | 0.62365200  | -0.78648500 |
| H | -3.17059000 | 1.10979900  | 1.52002200  |
| H | -3.07100000 | -2.80023200 | 0.44105700  |
| H | -1.85188200 | -3.11307500 | -0.79523200 |
| H | -0.77264700 | -2.47341700 | 1.36845400  |
| H | -0.42179500 | -1.30307900 | 0.10192200  |
| H | -2.39975900 | -1.05330800 | 2.41321500  |
| H | -0.99105000 | -0.04839100 | 2.11058300  |
| H | -2.15964300 | -0.77053800 | -1.66455600 |
| C | 3.54374600  | -0.84501800 | -1.28639200 |
| C | 2.32238900  | -0.22776900 | -1.05560900 |
| C | 2.10466600  | 0.52548500  | 0.10976800  |
| C | 3.15532700  | 0.62499300  | 1.03327900  |
| C | 4.37805500  | 0.00564400  | 0.80362800  |
| C | 4.57947200  | -0.73160200 | -0.35973600 |
| H | 3.68967800  | -1.42357300 | -2.19607200 |
| H | 1.52277100  | -0.33689000 | -1.78654300 |
| H | 3.00071000  | 1.20239600  | 1.94426700  |
| H | 5.17676900  | 0.10009900  | 1.53607800  |
| H | 5.53474900  | -1.21780500 | -0.54312300 |
| C | 0.83992200  | 1.19440900  | 0.39988600  |
| H | 0.77418500  | 1.66462600  | 1.38543300  |
| C | -0.22784500 | 1.28738700  | -0.41321900 |
| H | -0.18756900 | 0.86074100  | -1.41968200 |
| C | -1.46949700 | 1.95999000  | -0.05680300 |
| H | -1.46166800 | 2.44280000  | 0.92405500  |
| C | -2.28816500 | 2.49136100  | -1.03654300 |
| H | -3.11746600 | 3.14928900  | -0.78957300 |
| H | -2.19198800 | 2.17718600  | -2.07520200 |

**TS3''**

|   |             |             |             |
|---|-------------|-------------|-------------|
| C | -1.92135400 | -0.11795000 | 0.99517000  |
| C | -2.97466400 | -0.59529500 | 0.05079900  |
| C | -2.45573100 | -1.61341400 | -0.96049300 |
| C | -1.68365800 | -2.72501300 | -0.26024200 |
| C | -0.49501400 | -2.14971900 | 0.50027400  |
| C | -0.93945000 | -1.11113000 | 1.52775200  |
| H | -3.29215300 | -2.02179600 | -1.54175300 |
| H | -3.78111700 | -1.07385600 | 0.64026500  |
| H | -3.44969800 | 0.26353100  | -0.44747300 |
| H | -2.24575000 | 0.63817500  | 1.71376500  |
| H | -2.35582500 | -3.24304500 | 0.44422400  |
| H | -1.34703700 | -3.47798600 | -0.98441400 |
| H | 0.07010200  | -2.94620900 | 1.00116000  |
| H | 0.19644700  | -1.68356300 | -0.21800700 |
| H | -1.42131400 | -1.63983400 | 2.37281100  |
| H | -0.07005300 | -0.59281700 | 1.96066100  |
| H | -1.78867800 | -1.11436700 | -1.68227100 |
| C | 2.98688000  | -0.56213600 | -1.41218900 |
| C | 1.81525900  | 0.12417800  | -1.12840100 |
| C | 1.66479800  | 0.83296200  | 0.08175800  |
| C | 2.75217700  | 0.83203600  | 0.97725600  |
| C | 3.92317500  | 0.14571300  | 0.68988200  |
| C | 4.04833700  | -0.55870900 | -0.50674300 |
| H | 3.07885800  | -1.09895400 | -2.35415400 |
| H | 1.00658400  | 0.12555900  | -1.85820200 |
| H | 2.65762300  | 1.38021700  | 1.91444000  |
| H | 4.74529800  | 0.15962200  | 1.40226900  |
| H | 4.96574200  | -1.09563000 | -0.73578500 |
| C | 0.47001800  | 1.56801100  | 0.42171200  |
| H | 0.54041400  | 2.20798000  | 1.30612000  |
| C | -0.75470500 | 1.50019200  | -0.21035800 |
| H | -0.84670100 | 0.93537200  | -1.14132500 |
| C | -1.76415400 | 2.52715100  | 0.00703200  |
| H | -1.65430400 | 3.11281300  | 0.92397700  |
| C | -2.77452500 | 2.79392400  | -0.82864000 |
| H | -3.49695200 | 3.57902600  | -0.62371600 |
| H | -2.89584600 | 2.24095300  | -1.76000900 |

**TS3'''**

|   |             |            |             |
|---|-------------|------------|-------------|
| C | -1.07179600 | 1.17166200 | -0.98153300 |
| C | -1.69780700 | 1.73980700 | 0.25151100  |
| C | -0.68011900 | 2.09913600 | 1.32996700  |
| C | 0.43922200  | 2.95515600 | 0.74887500  |

|   |             |             |             |
|---|-------------|-------------|-------------|
| C | 1.15609800  | 2.21002800  | -0.37026800 |
| C | 0.18767100  | 1.80754800  | -1.48150400 |
| H | -1.18041700 | 2.61738100  | 2.15817800  |
| H | -2.23999900 | 2.66215000  | -0.03530600 |
| H | -2.46569500 | 1.05372500  | 0.63795600  |
| H | -1.78576700 | 0.88891100  | -1.75924700 |
| H | 0.00976300  | 3.89076000  | 0.35219700  |
| H | 1.15134400  | 3.24466700  | 1.53244300  |
| H | 1.96307600  | 2.82391000  | -0.79072200 |
| H | 1.62864400  | 1.30995700  | 0.04752400  |
| H | -0.09638700 | 2.71897800  | -2.04407000 |
| H | 0.68662300  | 1.15750900  | -2.21589200 |
| H | -0.24812700 | 1.17699700  | 1.74921200  |
| C | 2.43229400  | -1.29253400 | 1.47047200  |
| C | 1.08820800  | -1.22597900 | 1.12850400  |
| C | 0.68810700  | -1.18196000 | -0.21619600 |
| C | 1.68621500  | -1.23462900 | -1.19913200 |
| C | 3.03276500  | -1.30000600 | -0.85839700 |
| C | 3.41345000  | -1.32399000 | 0.47998000  |
| H | 2.71826200  | -1.31982100 | 2.51975400  |
| H | 0.33868100  | -1.19753700 | 1.91785900  |
| H | 1.39263200  | -1.22439000 | -2.24875900 |
| H | 3.78669300  | -1.33664700 | -1.64169700 |
| H | 4.46519000  | -1.37246700 | 0.75175900  |
| C | -0.71673100 | -1.09744100 | -0.63084400 |
| H | -0.86801900 | -1.16543900 | -1.71098500 |
| C | -1.79177300 | -1.44113600 | 0.16801100  |
| H | -1.65735300 | -1.55902200 | 1.24620300  |
| C | -3.12184300 | -1.56656800 | -0.33780900 |
| H | -3.24155400 | -1.43781900 | -1.41788100 |
| C | -4.21391300 | -1.82758600 | 0.41290000  |
| H | -5.20298000 | -1.91870200 | -0.02674700 |
| H | -4.13489200 | -1.96215500 | 1.49100700  |

7

|   |             |             |             |
|---|-------------|-------------|-------------|
| C | -2.15368500 | -2.22488700 | 1.52903300  |
| O | -0.89999500 | -2.94197800 | 1.33603000  |
| C | -2.09873400 | -1.13690300 | 0.43536700  |
| H | -2.27064700 | -0.12719400 | 0.82958800  |
| C | -0.18477300 | -2.25365400 | 0.43677800  |
| N | -0.73519300 | -1.23062200 | -0.09962600 |
| C | 1.16065800  | -2.79192100 | 0.15391800  |
| C | 1.25769800  | -4.32186400 | 0.04667500  |
| C | 1.80317300  | -3.65328600 | 1.23667800  |

|    |             |             |             |
|----|-------------|-------------|-------------|
| H  | 0.31273000  | -4.84979300 | 0.13133600  |
| H  | 1.94468200  | -4.69331500 | -0.70703800 |
| H  | 1.24805000  | -3.71480000 | 2.16752500  |
| H  | 2.88032900  | -3.55423400 | 1.32937900  |
| C  | 4.09554900  | -1.70923100 | -1.67711100 |
| O  | 3.28777900  | -2.59537600 | -0.86281000 |
| C  | 3.10416400  | -0.59699300 | -2.08771300 |
| H  | 2.86563500  | -0.58149400 | -3.15842000 |
| C  | 2.08388100  | -2.03237500 | -0.71179900 |
| N  | 1.87705400  | -0.93036100 | -1.34226600 |
| C  | -4.82293700 | -3.24973800 | -0.91574300 |
| C  | -5.13174600 | -2.65787400 | -2.13808000 |
| C  | -4.45094600 | -1.51838200 | -2.57045100 |
| C  | -3.44622500 | -0.95820000 | -1.78501800 |
| C  | -3.14006900 | -1.55503200 | -0.56539800 |
| C  | -3.82108800 | -2.69071500 | -0.12855700 |
| H  | -5.35945300 | -4.13607200 | -0.58172600 |
| H  | -5.91300600 | -3.08613500 | -2.76190800 |
| H  | -4.70606700 | -1.06650500 | -3.52635600 |
| H  | -2.90444000 | -0.07327200 | -2.12122500 |
| C  | -3.34863800 | -3.12885900 | 1.23141900  |
| H  | -3.05843400 | -4.18567900 | 1.27155200  |
| H  | -4.13108100 | -2.98984200 | 1.98805000  |
| C  | 3.25232600  | 1.97109700  | -1.76514800 |
| C  | 3.73172100  | 0.67668500  | -1.60525900 |
| C  | 4.89437100  | 0.41577800  | -0.88286500 |
| C  | 5.60161400  | 1.46497700  | -0.30433500 |
| C  | 5.12435600  | 2.76580700  | -0.45701800 |
| C  | 3.95850300  | 3.02038500  | -1.18223700 |
| H  | 2.34051000  | 2.15886400  | -2.33170500 |
| H  | 6.51286700  | 1.27491600  | 0.25994400  |
| H  | 5.66655000  | 3.59317400  | -0.00531600 |
| H  | 3.59465600  | 4.03967900  | -1.28345900 |
| C  | 5.21526200  | -1.05378900 | -0.85646800 |
| H  | 5.22492700  | -1.46529800 | 0.16212700  |
| H  | 4.46713300  | -2.30860000 | -2.51066500 |
| H  | 6.20116800  | -1.26557200 | -1.28680800 |
| H  | -2.13361900 | -1.81212100 | 2.54249700  |
| Cu | 0.31747800  | 0.22478800  | -1.15315800 |
| N  | -1.06752500 | 2.40196500  | 1.97372800  |
| C  | 0.19779100  | 2.61416200  | 1.49194300  |
| C  | -1.08094900 | 1.20839600  | 2.62868800  |
| O  | -2.06198500 | 0.65901100  | 3.14504900  |
| O  | 0.58187000  | 3.58392700  | 0.84000000  |

|    |             |             |             |
|----|-------------|-------------|-------------|
| C  | 0.29351300  | 0.58866300  | 2.60479200  |
| C  | 1.08585000  | 1.45375900  | 1.86455300  |
| C  | 2.41993100  | 1.18606200  | 1.61850500  |
| C  | 2.95040700  | 0.00912200  | 2.16131800  |
| C  | 2.15807600  | -0.85170400 | 2.92239200  |
| C  | 0.80352100  | -0.57557600 | 3.14841200  |
| H  | 3.03588800  | 1.86661700  | 1.03119400  |
| H  | 4.00284100  | -0.22573100 | 2.00470500  |
| H  | 2.60513000  | -1.74640900 | 3.35208400  |
| H  | 0.18062300  | -1.24286000 | 3.74334100  |
| Si | -3.39334900 | 3.18531000  | -0.41417700 |
| C  | -4.25100600 | 1.98519800  | 0.72867200  |
| H  | -5.20123900 | 2.42031100  | 1.06129400  |
| H  | -3.63895800 | 1.75056600  | 1.60808200  |
| H  | -4.48079800 | 1.05412500  | 0.19268700  |
| C  | -4.35616700 | 3.37837600  | -2.01098500 |
| H  | -5.32376700 | 3.85166200  | -1.80794400 |
| H  | -4.55065800 | 2.40081400  | -2.46856000 |
| H  | -3.82041300 | 4.00002800  | -2.73611200 |
| C  | -2.85317700 | 4.80594200  | 0.32397200  |
| H  | -2.05012800 | 4.61110300  | 1.04190900  |
| H  | -3.69243700 | 5.28550000  | 0.83968800  |
| H  | -2.48860200 | 5.48837900  | -0.45109800 |
| C  | -1.80984700 | 2.29064900  | -0.99531300 |
| N  | -0.89941800 | 1.66285700  | -1.35846900 |

#### TS4

|   |             |             |             |
|---|-------------|-------------|-------------|
| C | -2.76455400 | -1.54361700 | 1.61800400  |
| O | -1.61124900 | -2.43579800 | 1.62428700  |
| C | -2.52711300 | -0.70205500 | 0.34652100  |
| H | -2.64061200 | 0.37710400  | 0.50495000  |
| C | -0.75782500 | -1.98562100 | 0.69462500  |
| N | -1.13841700 | -0.99989300 | -0.02821300 |
| C | 0.51373500  | -2.72840500 | 0.60155200  |
| C | 0.39323400  | -4.25447800 | 0.77098000  |
| C | 0.98216800  | -3.45836500 | 1.85602900  |
| H | -0.62070500 | -4.62540400 | 0.88410100  |
| H | 1.04897100  | -4.84446700 | 0.13832100  |
| H | 0.38533800  | -3.27341500 | 2.74372500  |
| H | 2.05709800  | -3.49239900 | 2.00294400  |
| C | 3.56059700  | -2.55196200 | -1.35282400 |
| O | 2.70293100  | -2.97236700 | -0.25930800 |
| C | 2.79417700  | -1.34649100 | -1.94037600 |
| H | 2.62879100  | -1.41528900 | -3.02186300 |

|    |             |             |             |
|----|-------------|-------------|-------------|
| C  | 1.55622600  | -2.28961000 | -0.34657400 |
| N  | 1.48884300  | -1.38472400 | -1.25866800 |
| C  | -5.31522300 | -2.84770900 | -0.80943700 |
| C  | -5.43367200 | -2.53807800 | -2.16252600 |
| C  | -4.59734800 | -1.58900900 | -2.75317400 |
| C  | -3.62695100 | -0.93680700 | -1.99641100 |
| C  | -3.51049800 | -1.25426800 | -0.64817800 |
| C  | -4.34485000 | -2.19918700 | -0.05242200 |
| H  | -5.97195400 | -3.58645900 | -0.35348100 |
| H  | -6.18712200 | -3.03983800 | -2.76550400 |
| H  | -4.70648300 | -1.35765300 | -3.81026800 |
| H  | -2.96848500 | -0.19293700 | -2.44471200 |
| C  | -4.05295000 | -2.33576400 | 1.41761700  |
| H  | -3.93465400 | -3.37392100 | 1.74961000  |
| H  | -4.85870800 | -1.90193700 | 2.02363500  |
| C  | 3.32680600  | 1.19211000  | -1.74579200 |
| C  | 3.62243400  | -0.15209000 | -1.55348400 |
| C  | 4.79331300  | -0.54885800 | -0.90684800 |
| C  | 5.69731300  | 0.40505000  | -0.45170900 |
| C  | 5.41103600  | 1.75462700  | -0.65241800 |
| C  | 4.23286800  | 2.14641400  | -1.29028300 |
| H  | 2.39234000  | 1.50078100  | -2.21456500 |
| H  | 6.61330600  | 0.10399000  | 0.05343100  |
| H  | 6.10868900  | 2.51060000  | -0.29931200 |
| H  | 4.00510300  | 3.20194900  | -1.41263800 |
| C  | 4.90309500  | -2.04653900 | -0.82986500 |
| H  | 5.08929700  | -2.41936300 | 0.18488000  |
| H  | 3.64667300  | -3.40835000 | -2.02712700 |
| H  | 5.72184900  | -2.42110700 | -1.45681100 |
| H  | -2.72146700 | -0.96247900 | 2.54437600  |
| Cu | 0.02526000  | -0.09994600 | -1.50110200 |
| N  | -0.63673300 | 2.48743600  | 1.07953500  |
| C  | 0.71061500  | 2.39997600  | 0.77343300  |
| C  | -0.93341800 | 1.59794600  | 2.08984000  |
| O  | -2.01366100 | 1.44210700  | 2.64894800  |
| O  | 1.28818300  | 3.10733300  | -0.04201100 |
| C  | 0.30692700  | 0.81898800  | 2.40643900  |
| C  | 1.31646000  | 1.30638400  | 1.58858900  |
| C  | 2.59987700  | 0.79288100  | 1.63312600  |
| C  | 2.84226500  | -0.24592400 | 2.53745900  |
| C  | 1.82991700  | -0.72673300 | 3.37075900  |
| C  | 0.53639200  | -0.19498300 | 3.31738700  |
| H  | 3.38758500  | 1.19005100  | 0.99678300  |
| H  | 3.83912700  | -0.67927200 | 2.60120600  |

|    |             |             |             |
|----|-------------|-------------|-------------|
| H  | 2.05423600  | -1.52524900 | 4.07509600  |
| H  | -0.25605600 | -0.55904700 | 3.96881000  |
| Si | -1.80176900 | 3.82431800  | -0.08502200 |
| C  | -3.50006100 | 3.16367100  | 0.38313100  |
| H  | -4.17644400 | 4.01913900  | 0.50874400  |
| H  | -3.48125800 | 2.58273200  | 1.30987300  |
| H  | -3.90816400 | 2.53914900  | -0.42285700 |
| C  | -2.15857100 | 4.97766900  | -1.58487000 |
| H  | -2.76824700 | 5.83772100  | -1.27387900 |
| H  | -2.69048200 | 4.45326000  | -2.39121400 |
| H  | -1.22853300 | 5.37765000  | -2.01263800 |
| C  | -1.15844400 | 5.14563700  | 1.12021600  |
| H  | -0.07973700 | 5.29299400  | 0.99099100  |
| H  | -1.32519700 | 4.82742800  | 2.15657300  |
| H  | -1.65613800 | 6.10841700  | 0.94857500  |
| C  | -1.17274600 | 2.42790700  | -1.39245100 |
| N  | -0.81180000 | 1.53534800  | -2.05968400 |

## 8

|   |             |             |             |
|---|-------------|-------------|-------------|
| C | 3.06202000  | -1.28152000 | -1.73769000 |
| O | 2.10439100  | -2.16026200 | -1.08809100 |
| C | 2.54010300  | 0.12291900  | -1.35749600 |
| H | 2.43415200  | 0.80558700  | -2.20875900 |
| C | 1.10345700  | -1.39576500 | -0.62855400 |
| N | 1.21548400  | -0.12715300 | -0.76793500 |
| C | -0.01466500 | -2.14154700 | -0.02461900 |
| C | 0.32615800  | -3.49486800 | 0.60594400  |
| C | -0.37347700 | -3.47489100 | -0.68672900 |
| H | 1.38212400  | -3.74366500 | 0.62409800  |
| H | -0.23928200 | -3.74392000 | 1.49826500  |
| H | 0.18905200  | -3.70881700 | -1.58500800 |
| H | -1.43224000 | -3.71093900 | -0.71101500 |
| C | -3.07640400 | -1.29153700 | 1.72116200  |
| O | -2.12641500 | -2.16063700 | 1.04790000  |
| C | -2.54745900 | 0.11703700  | 1.37137700  |
| H | -2.42874000 | 0.77708300  | 2.23835300  |
| C | -1.12257300 | -1.39693300 | 0.59843500  |
| N | -1.22815400 | -0.12895300 | 0.76596900  |
| C | 5.56503300  | -0.04694700 | 0.77514200  |
| C | 5.49661700  | 1.11514400  | 1.53995600  |
| C | 4.44946100  | 2.02219300  | 1.36716600  |
| C | 3.45106000  | 1.77757400  | 0.42770600  |
| C | 3.52330900  | 0.61272500  | -0.32848600 |
| C | 4.56912800  | -0.29475200 | -0.16404300 |

|    |             |             |             |
|----|-------------|-------------|-------------|
| H  | 6.38419600  | -0.75065900 | 0.91191100  |
| H  | 6.26807600  | 1.31836500  | 2.27937100  |
| H  | 4.41409900  | 2.92587800  | 1.97120700  |
| H  | 2.62643100  | 2.47756000  | 0.28898200  |
| C  | 4.44854200  | -1.44846900 | -1.12151700 |
| H  | 4.55044000  | -2.43083400 | -0.64540200 |
| H  | 5.21714400  | -1.39713200 | -1.90343200 |
| C  | -3.45676500 | 1.82065900  | -0.36754500 |
| C  | -3.53344400 | 0.63934000  | 0.36172000  |
| C  | -4.58676500 | -0.25608400 | 0.18207200  |
| C  | -5.58720500 | 0.02264400  | -0.74357200 |
| C  | -5.51470900 | 1.20257900  | -1.48014600 |
| C  | -4.45871400 | 2.09665600  | -1.29419000 |
| H  | -2.62366400 | 2.50863400  | -0.22091100 |
| H  | -6.41268000 | -0.67112800 | -0.89204700 |
| H  | -6.28971400 | 1.43005600  | -2.20860000 |
| H  | -4.41906300 | 3.01350700  | -1.87752800 |
| C  | -4.46685000 | -1.43553000 | 1.10771300  |
| H  | -4.57498200 | -2.40401500 | 0.60534500  |
| H  | -3.03527000 | -1.54604800 | 2.78383300  |
| H  | -5.23132900 | -1.40271600 | 1.89450800  |
| H  | 3.02431300  | -1.51122700 | -2.80627200 |
| C  | 0.29058100  | 4.35269900  | -0.13910700 |
| N  | 0.13673400  | 3.18507800  | -0.06848900 |
| Cu | -0.03496400 | 1.31616800  | 0.02998700  |

### TS5

|   |             |             |             |
|---|-------------|-------------|-------------|
| C | -3.08467400 | 1.24920100  | -1.74135400 |
| O | -2.14476500 | 2.11701500  | -1.05022600 |
| C | -2.56521500 | -0.15861700 | -1.37543900 |
| H | -2.46583000 | -0.83702700 | -2.23102000 |
| C | -1.13649600 | 1.35016400  | -0.61130400 |
| N | -1.23908000 | 0.08497800  | -0.78983100 |
| C | -0.02741600 | 2.09049900  | 0.01761900  |
| C | -0.38804400 | 3.42374600  | 0.68013700  |
| C | 0.31629100  | 3.44529900  | -0.60964900 |
| H | -1.44694500 | 3.65922800  | 0.70090600  |
| H | 0.17089100  | 3.65721400  | 1.58066700  |
| H | -0.24635800 | 3.69392300  | -1.50390500 |
| H | 1.37201300  | 3.69514300  | -0.62434600 |
| C | 3.04428600  | 1.25084100  | 1.75295000  |
| O | 2.07904100  | 2.11935000  | 1.10040100  |
| C | 2.54599700  | -0.15807800 | 1.36095400  |
| H | 2.44225100  | -0.84808600 | 2.20649600  |



|    |             |             |             |
|----|-------------|-------------|-------------|
| C  | 1.09131200  | 1.34850100  | 0.62738400  |
| N  | 1.22161100  | 0.07926000  | 0.76384000  |
| C  | -5.59643000 | -0.00134100 | 0.74968900  |
| C  | -5.51792000 | -1.15591700 | 1.52492900  |
| C  | -4.45896900 | -2.05162300 | 1.36553000  |
| C  | -3.46060100 | -1.80357000 | 0.42720600  |
| C  | -3.54513600 | -0.64925700 | -0.34305000 |
| C  | -4.60041600 | 0.24903600  | -0.18862000 |
| H  | -6.42277500 | 0.69532800  | 0.87885300  |
| H  | -6.28940200 | -1.36097200 | 2.26376200  |
| H  | -4.41362100 | -2.94786000 | 1.97979200  |
| H  | -2.62512800 | -2.49229500 | 0.29980900  |
| C  | -4.48352000 | 1.39882500  | -1.15137700 |
| H  | -4.61010100 | 2.38233100  | -0.68378200 |
| H  | -5.23609800 | 1.32929200  | -1.94745900 |
| C  | 3.49020300  | -1.78560300 | -0.43266200 |
| C  | 3.54134100  | -0.62642000 | 0.33367300  |
| C  | 4.57445300  | 0.29771700  | 0.18166700  |
| C  | 5.57821100  | 0.07240600  | -0.75469400 |
| C  | 5.53046400  | -1.08392100 | -1.52958500 |
| C  | 4.49607400  | -2.00785000 | -1.36954000 |
| H  | 2.67664500  | -2.49992300 | -0.30296700 |
| H  | 6.38742000  | 0.78927500  | -0.88178800 |
| H  | 6.30808700  | -1.26950200 | -2.26714100 |
| H  | 4.47638100  | -2.90677600 | -1.98121900 |
| C  | 4.43234200  | 1.44173100  | 1.14771500  |
| H  | 4.52411600  | 2.42927700  | 0.68048300  |
| H  | 2.99424700  | 1.47422800  | 2.82222600  |
| H  | 5.19612700  | 1.39401700  | 1.93451800  |
| H  | -3.02283600 | 1.50117900  | -2.80387700 |
| C  | -0.17312500 | -3.28175000 | -0.49978600 |
| N  | 0.27128300  | -3.54714600 | 0.56807600  |
| Cu | 0.04696400  | -1.34043700 | -0.05828800 |

|   |             |             |             |
|---|-------------|-------------|-------------|
| C |             |             |             |
| C | -0.35198400 | -3.47885500 | -0.64540600 |
| C | -0.00015700 | -2.13535500 | -0.00008700 |
| C | 0.35154200  | -3.47891400 | 0.64518100  |
| C | 1.11179900  | -1.38920800 | -0.61319800 |
| O | 2.10579400  | -2.15310300 | -1.08521500 |
| C | 2.54712100  | 0.12859200  | -1.35205800 |
| C | 3.05847400  | -1.27602600 | -1.74412300 |
| H | 2.43302400  | 0.81444500  | -2.19963100 |
| H | 3.00508100  | -1.50149100 | -2.81288400 |

|          |             |             |             |
|----------|-------------|-------------|-------------|
| C        | -1.11203900 | -1.38913000 | 0.61306300  |
| O        | -2.10608300 | -2.15296200 | 1.08504400  |
| C        | -2.54726000 | 0.12873100  | 1.35208000  |
| C        | -3.05870500 | -1.27588000 | 1.74402500  |
| H        | -2.43307500 | 0.81448900  | 2.19971600  |
| H        | -3.00532400 | -1.50144100 | 2.81276500  |
| N        | -1.22749400 | -0.11928700 | 0.74863900  |
| N        | 1.22732700  | -0.11937700 | -0.74868100 |
| Cu       | -0.00017300 | 1.33772700  | 0.00022600  |
| C        | 0.00122700  | 3.22637000  | -0.00027000 |
| N        | 0.00229600  | 4.39940800  | -0.00058100 |
| C        | -4.59098000 | -0.30108300 | 0.18808200  |
| C        | -3.54661900 | 0.61138000  | 0.33488800  |
| C        | -3.49437400 | 1.77520100  | -0.42408900 |
| C        | -4.50776300 | 2.01388000  | -1.34853200 |
| C        | -5.55246000 | 1.10084800  | -1.50370900 |
| C        | -5.60255700 | -0.06002800 | -0.73589900 |
| C        | -4.45214800 | -1.45148300 | 1.14683800  |
| H        | -2.67223000 | 2.48014000  | -0.30015900 |
| H        | -4.48608300 | 2.91707600  | -1.95378500 |
| H        | -6.33633200 | 1.29887000  | -2.23132400 |
| H        | -6.42013800 | -0.76816700 | -0.85829500 |
| C        | 3.54649400  | 0.61106600  | -0.33479100 |
| C        | 4.59080200  | -0.30147300 | -0.18808000 |
| C        | 5.60239100  | -0.06057800 | 0.73592900  |
| C        | 5.55236000  | 1.10021600  | 1.50386600  |
| C        | 4.50771000  | 2.01331900  | 1.34878800  |
| C        | 3.49430400  | 1.77480500  | 0.42432000  |
| C        | 4.45190700  | -1.45176900 | -1.14695200 |
| H        | 6.41993100  | -0.76877900 | 0.85825000  |
| H        | 6.33624300  | 1.29811600  | 2.23150400  |
| H        | 4.48607900  | 2.91645000  | 1.95414300  |
| H        | 2.67218500  | 2.47979100  | 0.30047100  |
| H        | 4.55484200  | -2.43594000 | -0.67485400 |
| H        | 5.21057100  | -1.40208300 | -1.93855900 |
| H        | -5.21080700 | -1.40183000 | 1.93845200  |
| H        | -4.55514100 | -2.43560300 | 0.67464500  |
| H        | 0.20914500  | -3.72019100 | -1.54256100 |
| H        | -1.40951900 | -3.72099000 | -0.66313200 |
| H        | 1.40905800  | -3.72113600 | 0.66289700  |
| H        | -0.20960500 | -3.72024500 | 1.54232600  |
| <b>D</b> |             |             |             |
| C        | 0.31113700  | 3.56857100  | -1.04141800 |

|    |             |             |             |
|----|-------------|-------------|-------------|
| C  | -0.00613200 | 2.33825300  | -0.17908100 |
| C  | -0.39813300 | 3.76643900  | 0.22482100  |
| C  | -1.06513900 | 1.44692900  | -0.66868400 |
| O  | -2.15064100 | 2.03274200  | -1.14161300 |
| C  | -2.34587600 | -0.31268400 | -1.21459400 |
| C  | -3.02784700 | 0.99305500  | -1.68463500 |
| H  | -2.19017900 | -1.04786900 | -2.01143400 |
| H  | -3.03963200 | 1.14117000  | -2.76666600 |
| C  | 1.09098000  | 1.72601000  | 0.57068700  |
| O  | 2.12232600  | 2.49213200  | 0.87410400  |
| C  | 2.43189500  | 0.29262700  | 1.65615400  |
| C  | 3.15364200  | 1.64461500  | 1.47438700  |
| H  | 2.26702700  | -0.01444700 | 2.69413900  |
| H  | 3.44624000  | 2.13605300  | 2.40229800  |
| N  | 1.13806100  | 0.49915600  | 0.97959600  |
| N  | -1.03610100 | 0.15779400  | -0.72380200 |
| Cu | 0.45639400  | -0.98348500 | -0.06111300 |
| C  | 0.02474800  | -2.61404600 | -0.95323200 |
| N  | -0.26834600 | -3.60318900 | -1.50084600 |
| C  | 4.17477400  | -0.02519700 | 0.07121200  |
| C  | 3.19210800  | -0.67620000 | 0.80879200  |
| C  | 2.84457800  | -2.00930700 | 0.57556400  |
| C  | 3.52066300  | -2.69972800 | -0.43961100 |
| C  | 4.51941300  | -2.06092000 | -1.16734200 |
| C  | 4.86031100  | -0.72854500 | -0.91419200 |
| C  | 4.31275300  | 1.41470300  | 0.49348900  |
| H  | 2.13389500  | -2.52740700 | 1.22264900  |
| H  | 3.26946800  | -3.73614400 | -0.64762400 |
| H  | 5.04569800  | -2.60602700 | -1.94619100 |
| H  | 5.64199700  | -0.24608800 | -1.49672700 |
| C  | -3.22579400 | -0.80502700 | -0.09660000 |
| C  | -4.35268900 | 0.00456200  | 0.03894700  |
| C  | -5.28199300 | -0.25471100 | 1.04067200  |
| C  | -5.06532400 | -1.32981500 | 1.89841400  |
| C  | -3.94102700 | -2.14417600 | 1.75250600  |
| C  | -3.01136700 | -1.88909400 | 0.74817000  |
| C  | -4.39753500 | 1.06893100  | -1.02169800 |
| H  | -6.16452000 | 0.37189100  | 1.15168200  |
| H  | -5.78314400 | -1.54112700 | 2.68736000  |
| H  | -3.79316300 | -2.98551300 | 2.42490100  |
| H  | -2.14242900 | -2.53356300 | 0.61983200  |
| H  | -4.58763800 | 2.07561800  | -0.63229700 |
| H  | -5.18249800 | 0.86306900  | -1.75977500 |
| H  | 5.27498100  | 1.59764800  | 0.98579600  |

|          |             |             |             |
|----------|-------------|-------------|-------------|
| H        | 4.25179400  | 2.11639900  | -0.34632300 |
| H        | -0.24804200 | 3.62987800  | -1.96999800 |
| H        | 1.36399500  | 3.82583200  | -1.10033800 |
| H        | -1.46443800 | 3.96792900  | 0.20636200  |
| H        | 0.14751800  | 4.16698400  | 1.07372000  |
| <b>E</b> |             |             |             |
| C        | -2.16367400 | 3.97715700  | 0.08079900  |
| C        | -1.62968700 | 2.54183800  | 0.16153900  |
| C        | -2.52989500 | 3.15515600  | 1.24075700  |
| C        | -2.26608700 | 1.57139800  | -0.74328500 |
| O        | -3.52624600 | 1.86387700  | -1.08485300 |
| C        | -2.76320300 | -0.08707200 | -2.15125200 |
| C        | -4.03028800 | 0.73930600  | -1.84461300 |
| H        | -2.39183400 | -0.00232600 | -3.18068900 |
| H        | -4.52254100 | 1.15097300  | -2.72711300 |
| C        | -0.19987200 | 2.39519600  | 0.48756100  |
| O        | 0.30473600  | 3.39249600  | 1.22192900  |
| C        | 1.94028200  | 1.83244900  | 0.62389300  |
| C        | 1.69326000  | 3.07662100  | 1.50691000  |
| H        | 2.39495500  | 0.99376800  | 1.17062300  |
| H        | 1.75914100  | 2.89649000  | 2.58416500  |
| N        | 0.60014900  | 1.44814300  | 0.15019700  |
| N        | -1.75877700 | 0.50522300  | -1.24518700 |
| Cu       | 0.11706100  | -0.28241400 | -0.95792500 |
| C        | 0.79151200  | -0.85956500 | -2.67164700 |
| N        | 1.14681300  | -1.21428500 | -3.72925100 |
| C        | 3.14804300  | 3.67586800  | -0.29436800 |
| C        | 2.80618300  | 2.33960900  | -0.49691500 |
| C        | 3.21981500  | 1.65402600  | -1.63362700 |
| C        | 3.98813600  | 2.33034900  | -2.57711700 |
| C        | 4.33320500  | 3.66856100  | -2.37863200 |
| C        | 3.91739600  | 4.34933300  | -1.23748400 |
| C        | 2.61362400  | 4.19004400  | 1.01355900  |
| H        | 2.93362000  | 0.61458900  | -1.79401000 |
| H        | 4.31775700  | 1.81453400  | -3.47570900 |
| H        | 4.93191700  | 4.18489900  | -3.12534100 |
| H        | 4.18793100  | 5.39279700  | -1.08767700 |
| C        | -3.12004800 | -1.48816500 | -1.75794400 |
| C        | -4.32854500 | -1.51215900 | -1.06143900 |
| C        | -4.80336600 | -2.70997900 | -0.53531600 |
| C        | -4.05325000 | -3.87158400 | -0.71519900 |
| C        | -2.85583800 | -3.84569300 | -1.43302900 |
| C        | -2.38262700 | -2.64838700 | -1.96782600 |

|   |             |             |             |
|---|-------------|-------------|-------------|
| C | -4.95241700 | -0.14509900 | -0.99025500 |
| H | -5.74660100 | -2.74194700 | 0.00700300  |
| H | -4.41406000 | -4.81223600 | -0.30635100 |
| H | -2.29646700 | -4.76570700 | -1.58409600 |
| H | -1.45831000 | -2.61677100 | -2.54539100 |
| H | -4.98751200 | 0.24402800  | 0.03833200  |
| H | -5.98382200 | -0.13956100 | -1.35941900 |
| H | 3.42114700  | 4.36035700  | 1.73659200  |
| H | 2.06738200  | 5.13624400  | 0.92389200  |
| H | -2.90547100 | 4.15056900  | -0.69157800 |
| H | -1.41578900 | 4.75252000  | 0.20863400  |
| H | -3.53162700 | 2.73584000  | 1.29429400  |
| H | -2.04316000 | 3.34484300  | 2.19329100  |
| C | -1.60883300 | 1.04535500  | 3.85293400  |
| C | -0.91588500 | 0.26836300  | 2.94430500  |
| C | -1.61235300 | -0.62402900 | 2.09943500  |
| C | -3.01663300 | -0.71186000 | 2.20074300  |
| C | -3.70473600 | 0.06924900  | 3.11402500  |
| C | -3.00129700 | 0.94698400  | 3.93839800  |
| H | -1.07139000 | 1.72978100  | 4.50350100  |
| H | 0.16774000  | 0.34006400  | 2.89362500  |
| H | -3.55018500 | -1.40761200 | 1.55183400  |
| H | -4.78573000 | -0.00470500 | 3.19004200  |
| H | -3.53959600 | 1.56147800  | 4.65525400  |
| C | -0.95342300 | -1.43532300 | 1.12784600  |
| H | -1.59306100 | -2.06810300 | 0.50429700  |
| C | 0.42084200  | -1.50465400 | 0.90455500  |
| C | 0.95667100  | -2.23516700 | -0.15847700 |
| H | 0.27710200  | -2.87728400 | -0.72654800 |
| C | 2.40787400  | -2.43806000 | -0.36377200 |
| H | 2.97258800  | -1.58875800 | 0.04180200  |
| H | 2.61356200  | -2.48913300 | -1.43961700 |
| C | 2.87283700  | -3.76794400 | 0.28587400  |
| C | 4.28910400  | -4.11318700 | -0.18736900 |
| C | 5.34728700  | -3.19206300 | 0.41155700  |
| C | 5.28028900  | -3.20314500 | 1.93525100  |
| C | 3.88583300  | -2.83348400 | 2.43145600  |
| C | 2.82452100  | -3.74306100 | 1.81671400  |
| H | 6.34258100  | -3.50190100 | 0.06932600  |
| H | 4.50451200  | -5.14752400 | 0.12229700  |
| H | 4.33216100  | -4.09825600 | -1.28447200 |
| H | 2.19059100  | -4.55437700 | -0.07262700 |
| H | 5.52912600  | -4.21446000 | 2.29530600  |
| H | 6.03155800  | -2.52575900 | 2.36025200  |

|   |            |             |            |
|---|------------|-------------|------------|
| H | 3.83726300 | -2.90062900 | 3.52556800 |
| H | 3.68013100 | -1.77842600 | 2.18584600 |
| H | 2.99891600 | -4.77052400 | 2.17081800 |
| H | 1.82205700 | -3.46884100 | 2.17505700 |
| H | 5.20737300 | -2.16357500 | 0.04295200 |
| H | 1.10754700 | -0.94301200 | 1.53765700 |

A<sup>+</sup>

|   |             |             |             |
|---|-------------|-------------|-------------|
| C | -4.75178800 | 0.58358800  | 1.41453300  |
| C | -3.47846500 | 0.16267700  | 1.09688000  |
| C | -3.15795900 | -0.17010900 | -0.24295100 |
| C | -4.15606600 | -0.06453300 | -1.24214500 |
| C | -5.42836400 | 0.35950400  | -0.91473000 |
| C | -5.72323200 | 0.68207400  | 0.41137800  |
| H | -5.00306000 | 0.83790000  | 2.43956500  |
| H | -2.72541300 | 0.08326100  | 1.87559300  |
| H | -3.90491100 | -0.32020900 | -2.26920000 |
| H | -6.19376200 | 0.44283500  | -1.67984200 |
| H | -6.72502400 | 1.01483200  | 0.67057000  |
| C | -1.87387200 | -0.61027400 | -0.63014700 |
| H | -1.74649200 | -0.85277400 | -1.68773400 |
| C | -0.74867800 | -0.77198200 | 0.18404600  |
| H | -0.78497200 | -0.54576600 | 1.24833800  |
| C | 0.41987200  | -1.22611600 | -0.36383600 |
| H | 0.43681900  | -1.43752600 | -1.43733600 |
| C | 1.67066900  | -1.43525900 | 0.37490700  |
| H | 1.53501100  | -1.21369900 | 1.44260700  |
| H | 1.93892200  | -2.50087400 | 0.28444400  |
| C | 3.73194000  | 1.72406600  | -0.58689400 |
| C | 2.55335500  | 0.89374800  | -0.09205600 |
| C | 2.83755300  | -0.60401300 | -0.19614500 |
| C | 4.12955300  | -0.96147300 | 0.53465900  |
| C | 5.30470700  | -0.13085800 | 0.03291000  |
| C | 5.01284700  | 1.36032400  | 0.15467100  |
| H | 2.34760100  | 1.13577400  | 0.96536100  |
| H | 1.64194600  | 1.15008500  | -0.65233800 |
| H | 3.87382800  | 1.53929000  | -1.66381700 |
| H | 3.51109900  | 2.79338100  | -0.48008300 |
| H | 3.98399600  | -0.77367300 | 1.61207800  |
| H | 4.33564000  | -2.03532700 | 0.42757800  |
| H | 6.21480300  | -0.39509800 | 0.58572900  |
| H | 5.49689000  | -0.37735000 | -1.02358900 |
| H | 4.90068300  | 1.62097100  | 1.21941000  |
| H | 5.85664900  | 1.94982100  | -0.22506300 |

H 2.95730600 -0.86402800 -1.26275000

A-

C -4.48794700 1.27243700 1.08903500  
C -3.29035600 0.62421800 0.83853700  
C -3.14838500 -0.33636100 -0.21342500  
C -4.34002900 -0.56319400 -0.97271500  
C -5.52942200 0.09168800 -0.71062000  
C -5.63620200 1.02662800 0.32707500  
H -4.53031100 1.99469200 1.90650700  
H -2.42816500 0.85800900 1.46378100  
H -4.29338200 -1.28597700 -1.79042600  
H -6.40073000 -0.13102300 -1.32912100  
H -6.57268900 1.54063500 0.53250200  
C -1.95614100 -1.03070900 -0.51779100  
H -2.00056900 -1.72745300 -1.36228100  
C -0.72057700 -0.91695800 0.16325800  
H -0.69902400 -0.22029800 1.01430800  
C 0.45827900 -1.56348200 -0.07562500  
H 0.51737600 -2.26636300 -0.91536300  
C 1.70591100 -1.36691000 0.72462300  
H 1.46941200 -0.78005200 1.63151400  
H 2.10615100 -2.33112000 1.09414700  
C 3.63262400 1.50906000 -1.06241700  
C 2.49230600 0.78568200 -0.35597200  
C 2.85406700 -0.65366000 -0.00245700  
C 4.14010700 -0.68022100 0.82033900  
C 5.28881800 0.03731900 0.12057100  
C 4.90774500 1.47251300 -0.22672500  
H 2.24741800 1.31864500 0.58143600  
H 1.57638700 0.79430600 -0.96134400  
H 3.82533800 1.01909000 -2.03124900  
H 3.35132600 2.54633500 -1.28979200  
H 3.94207600 -0.18939100 1.79026900  
H 4.41467400 -1.72034900 1.05172700  
H 6.19451300 0.01794300 0.74204300  
H 5.53625800 -0.50214700 -0.80869900  
H 4.74015500 2.03482000 0.70686200  
H 5.73140400 1.97562500 -0.75116900  
H 3.04759600 -1.19422900 -0.94978700

9

C 3.08493300 1.45835800 1.62384800  
O 2.06308600 2.28381400 0.98289200

|   |             |             |             |
|---|-------------|-------------|-------------|
| C | 2.53613200  | 0.02004400  | 1.46330900  |
| H | 2.36721400  | -0.50405900 | 2.41044900  |
| C | 1.09747200  | 1.49817600  | 0.55160100  |
| N | 1.23415500  | 0.23513000  | 0.79124500  |
| C | -0.01140600 | 2.14901100  | -0.14840200 |
| C | 0.31457800  | 3.43243900  | -0.93085300 |
| C | -0.40646400 | 3.55486700  | 0.33587000  |
| H | 1.36888000  | 3.68855800  | -0.96101200 |
| H | -0.23227800 | 3.54753800  | -1.86133600 |
| H | 0.13010400  | 3.89830200  | 1.21489000  |
| H | -1.47273500 | 3.75709000  | 0.31835100  |
| C | -2.99044300 | 0.91830000  | -1.82419600 |
| O | -2.09544800 | 1.92871100  | -1.24943100 |
| C | -2.46153400 | -0.39482800 | -1.20484000 |
| H | -2.31517300 | -1.20434500 | -1.92709000 |
| C | -1.08364400 | 1.30441500  | -0.67875400 |
| N | -1.14953800 | 0.01402600  | -0.66138200 |
| C | 5.47856900  | -0.19817400 | -0.76219200 |
| C | 5.40999600  | -1.49226900 | -1.27320200 |
| C | 4.40400000  | -2.37076200 | -0.86851300 |
| C | 3.44492100  | -1.96082900 | 0.05504400  |
| C | 3.50817300  | -0.66053500 | 0.54517800  |
| C | 4.51538200  | 0.21765500  | 0.15091800  |
| H | 6.27313900  | 0.47617200  | -1.07449800 |
| H | 6.15495100  | -1.82636000 | -1.99105100 |
| H | 4.37413700  | -3.38106500 | -1.26767600 |
| H | 2.68051500  | -2.66030300 | 0.39890300  |
| C | 4.40490000  | 1.54104200  | 0.85652700  |
| H | 4.40379600  | 2.40193100  | 0.17810800  |
| H | 5.23887700  | 1.69204100  | 1.55225300  |
| C | -3.39176500 | -1.71226800 | 0.84151700  |
| C | -3.45794700 | -0.71069100 | -0.12087400 |
| C | -4.52973100 | 0.18112700  | -0.16165900 |
| C | -5.55257800 | 0.08836100  | 0.77568400  |
| C | -5.48502400 | -0.90493600 | 1.74884100  |
| C | -4.41507800 | -1.80091400 | 1.78103800  |
| H | -2.56128800 | -2.41560700 | 0.85364200  |
| H | -6.39148600 | 0.78072500  | 0.74956000  |
| H | -6.27640300 | -0.98746100 | 2.48995600  |
| H | -4.38224900 | -2.57546400 | 2.54313800  |
| C | -4.40823800 | 1.13396900  | -1.31723200 |
| H | -4.57377000 | 2.18382700  | -1.04990400 |
| H | -2.87495500 | 0.99548400  | -2.90760600 |
| H | -5.12658100 | 0.89313300  | -2.11072100 |



|    |             |             |             |
|----|-------------|-------------|-------------|
| H  | 3.14660000  | 1.80598600  | 2.65609500  |
| C  | -0.70941800 | -3.91634900 | -0.86882100 |
| N  | -0.36528900 | -2.84115100 | -0.51694200 |
| Cu | 0.22474500  | -1.18529700 | 0.04166900  |

### TS6

|   |             |             |             |
|---|-------------|-------------|-------------|
| C | -2.92483400 | 0.95882100  | -1.87128200 |
| O | -2.03413900 | 1.93753200  | -1.23500800 |
| C | -2.45605400 | -0.37835000 | -1.25336300 |
| H | -2.30243600 | -1.18127500 | -1.98115100 |
| C | -1.05997800 | 1.28043600  | -0.64053200 |
| N | -1.15424400 | -0.00902400 | -0.65636400 |
| C | 0.00732600  | 2.08422600  | -0.04446200 |
| C | -0.38605600 | 3.45924700  | 0.52632700  |
| C | 0.35015800  | 3.41451800  | -0.73605700 |
| H | -1.45091800 | 3.66931400  | 0.51019300  |
| H | 0.14142500  | 3.73867100  | 1.43332500  |
| H | -0.18650400 | 3.59089000  | -1.66297300 |
| H | 1.40628000  | 3.66482500  | -0.73897600 |
| C | 3.05150700  | 1.24207500  | 1.75786200  |
| O | 2.08162900  | 2.11976500  | 1.09669000  |
| C | 2.54122300  | -0.17379500 | 1.39904500  |
| H | 2.41037700  | -0.83462800 | 2.26272600  |
| C | 1.10272400  | 1.38046500  | 0.62161600  |
| N | 1.21901600  | 0.10343900  | 0.79299100  |
| C | -5.60825400 | 0.16143000  | 0.61192800  |
| C | -5.60267400 | -0.84364600 | 1.57522800  |
| C | -4.55669600 | -1.76595200 | 1.63876400  |
| C | -3.49558100 | -1.69281400 | 0.74103300  |
| C | -3.50047900 | -0.67984100 | -0.21173900 |
| C | -4.54757300 | 0.23869700  | -0.28377700 |
| H | -6.42799900 | 0.87503400  | 0.56115200  |
| H | -6.42376200 | -0.91388800 | 2.28452900  |
| H | -4.57243500 | -2.54861800 | 2.39297700  |
| H | -2.68424000 | -2.41711000 | 0.77942400  |
| C | -4.35789900 | 1.19940500  | -1.42363600 |
| H | -4.51336000 | 2.25013600  | -1.15397900 |
| H | -5.04540000 | 0.97939100  | -2.24968500 |
| C | 3.46505300  | -1.86160900 | -0.34558800 |
| C | 3.52388900  | -0.67679200 | 0.37970700  |
| C | 4.55113100  | 0.24494600  | 0.18508600  |
| C | 5.53873700  | -0.00697600 | -0.76125200 |
| C | 5.47729000  | -1.18428200 | -1.50257700 |
| C | 4.45097600  | -2.10778100 | -1.29720900 |

|    |             |             |             |
|----|-------------|-------------|-------------|
| H  | 2.67517000  | -2.59343900 | -0.17181800 |
| H  | 6.34564100  | 0.70489700  | -0.92130700 |
| H  | 6.24121000  | -1.38879600 | -2.24861200 |
| H  | 4.42445700  | -3.02502000 | -1.87957400 |
| C  | 4.42818800  | 1.41179900  | 1.12554400  |
| H  | 4.51537300  | 2.38893100  | 0.63712300  |
| H  | 3.00617100  | 1.48903300  | 2.82024400  |
| H  | 5.20156600  | 1.37822800  | 1.90262800  |
| H  | -2.75701000 | 1.05411200  | -2.94634600 |
| C  | -0.10281800 | -3.37757800 | 0.34880100  |
| N  | -0.51674500 | -3.01943000 | -0.70754400 |
| Cu | 0.11877400  | -1.26978900 | 0.07711300  |

### TS7<sub>s</sub>

|    |             |             |             |
|----|-------------|-------------|-------------|
| C  | -4.81456500 | 1.33332600  | 0.59315500  |
| C  | -3.43703500 | 0.65890200  | 0.53159800  |
| C  | -4.33350800 | 0.57678200  | 1.76058500  |
| C  | -3.34835800 | -0.54755400 | -0.31368200 |
| O  | -4.36682300 | -1.40676800 | -0.16289900 |
| C  | -2.81635900 | -2.15011000 | -1.76614200 |
| C  | -4.10608800 | -2.55037300 | -1.01047400 |
| H  | -2.95252600 | -2.02039900 | -2.84711600 |
| H  | -4.98224800 | -2.67281300 | -1.65092300 |
| C  | -2.26368300 | 1.54600700  | 0.63057100  |
| O  | -2.37296200 | 2.53428800  | 1.53472500  |
| C  | -0.32238300 | 2.58058900  | 0.40086200  |
| C  | -1.09399100 | 3.21788500  | 1.58060000  |
| H  | 0.66249600  | 2.17702400  | 0.67811700  |
| H  | -0.66408500 | 3.00425400  | 2.56480200  |
| N  | -1.17734900 | 1.47388800  | -0.03810500 |
| N  | -2.45150900 | -0.84844600 | -1.18168600 |
| Cu | -0.66441800 | 0.02550100  | -1.45071400 |
| C  | 2.15235700  | -0.07479300 | -2.29681200 |
| N  | 0.97466300  | 0.07547300  | -2.40215700 |
| C  | -0.80759600 | 4.85577400  | -0.14491500 |
| C  | -0.24598500 | 3.67476500  | -0.62815600 |
| C  | 0.26030500  | 3.59083700  | -1.92063100 |
| C  | 0.19644000  | 4.72002800  | -2.73313900 |
| C  | -0.36371600 | 5.90611300  | -2.25447900 |
| C  | -0.86792700 | 5.98274000  | -0.95830500 |
| C  | -1.25575400 | 4.70805500  | 1.28373700  |
| H  | 0.69067300  | 2.65649000  | -2.28265300 |
| H  | 0.58567000  | 4.67906400  | -3.74795600 |
| H  | -0.40548900 | 6.78009900  | -2.90081200 |

|   |             |             |             |
|---|-------------|-------------|-------------|
| H | -1.30254900 | 6.91000300  | -0.58879700 |
| C | -1.82413600 | -3.22609900 | -1.42814800 |
| C | -2.36308000 | -4.13150100 | -0.51625000 |
| C | -1.58759300 | -5.18143000 | -0.03354500 |
| C | -0.27221800 | -5.30641300 | -0.47464600 |
| C | 0.26225300  | -4.39962400 | -1.39179600 |
| C | -0.51375400 | -3.34915500 | -1.87765600 |
| C | -3.78885100 | -3.79755000 | -0.17461400 |
| H | -2.00014100 | -5.89263100 | 0.67973600  |
| H | 0.34474800  | -6.12144500 | -0.10327400 |
| H | 1.29126900  | -4.51164400 | -1.72669600 |
| H | -0.09607000 | -2.62255300 | -2.57499800 |
| H | -3.91923700 | -3.57775100 | 0.89420000  |
| H | -4.47210500 | -4.62235400 | -0.40950100 |
| H | -0.62880600 | 5.30219700  | 1.96101000  |
| H | -2.29062300 | 5.02903300  | 1.45303100  |
| H | -5.57835800 | 0.89163800  | -0.03977000 |
| H | -4.79834900 | 2.41843500  | 0.62849000  |
| H | -4.76199000 | -0.39957900 | 1.96243500  |
| H | -3.97884800 | 1.12990600  | 2.62417700  |
| C | -0.39800100 | 0.38325600  | 3.71241000  |
| C | 0.50332600  | 0.11159400  | 2.69132200  |
| C | 0.27295200  | -0.93571700 | 1.77606100  |
| C | -0.89635500 | -1.70478800 | 1.95324400  |
| C | -1.79933200 | -1.42388700 | 2.96830800  |
| C | -1.56234300 | -0.37318300 | 3.85575800  |
| H | -0.18874500 | 1.19312600  | 4.41016700  |
| H | 1.40849500  | 0.71223400  | 2.60392800  |
| H | -1.08784100 | -2.53309100 | 1.26740000  |
| H | -2.69887800 | -2.03056500 | 3.06875600  |
| H | -2.26842700 | -0.15429600 | 4.65372100  |
| C | 1.16521400  | -1.25475300 | 0.68394800  |
| H | 0.88371200  | -2.13299600 | 0.09533600  |
| C | 2.31968400  | -0.60656800 | 0.33067500  |
| C | 3.07025600  | -0.92419600 | -0.84143300 |
| H | 2.89532500  | -1.93946100 | -1.22155300 |
| C | 4.49924600  | -0.46766000 | -0.96321900 |
| H | 4.57000000  | 0.56790300  | -0.59593000 |
| H | 4.76085800  | -0.42207500 | -2.03055300 |
| C | 5.51736300  | -1.37472200 | -0.25665900 |
| C | 6.95315100  | -1.00648200 | -0.64806300 |
| C | 7.40632700  | 0.31437700  | -0.03140500 |
| C | 7.26739800  | 0.28283100  | 1.48732800  |
| C | 5.84337100  | -0.07117600 | 1.90493600  |

|   |            |             |             |
|---|------------|-------------|-------------|
| C | 5.39500800 | -1.38518100 | 1.27130000  |
| H | 8.44558100 | 0.52534100  | -0.31647600 |
| H | 7.62880000 | -1.80437400 | -0.29964900 |
| H | 7.04643500 | -0.97226500 | -1.74301100 |
| H | 5.32225200 | -2.39962200 | -0.61587600 |
| H | 7.95638800 | -0.47741200 | 1.89164900  |
| H | 7.57236400 | 1.24321700  | 1.92371400  |
| H | 5.77119300 | -0.13973500 | 2.99854300  |
| H | 5.16186700 | 0.74088800  | 1.60524200  |
| H | 6.03240800 | -2.19517900 | 1.66162600  |
| H | 4.36467300 | -1.62461200 | 1.56625500  |
| H | 6.80392500 | 1.14237700  | -0.43622700 |
| H | 2.62972700 | 0.29184000  | 0.87577100  |

**TS8<sub>s</sub>**

|    |             |             |             |
|----|-------------|-------------|-------------|
| C  | -4.98167200 | 0.31843000  | 0.76492200  |
| C  | -3.49177100 | -0.04201400 | 0.62606000  |
| C  | -4.30075900 | -0.33153200 | 1.89061000  |
| C  | -3.18312700 | -1.18704500 | -0.24524800 |
| O  | -3.99346200 | -2.23594700 | -0.11364900 |
| C  | -2.34392000 | -2.62097200 | -1.74825800 |
| C  | -3.46858800 | -3.30678100 | -0.94130400 |
| H  | -2.56525500 | -2.48751100 | -2.81400300 |
| H  | -4.30111400 | -3.66795400 | -1.54704400 |
| C  | -2.54188100 | 1.08039300  | 0.69036800  |
| O  | -2.84358200 | 2.03530800  | 1.57097800  |
| C  | -0.91157300 | 2.55413400  | 0.35428700  |
| C  | -1.73897300 | 2.98561800  | 1.58484000  |
| H  | 0.16424900  | 2.44726600  | 0.54900100  |
| H  | -1.23285000 | 2.85194000  | 2.54594200  |
| N  | -1.47021100 | 1.24071700  | 0.00136900  |
| N  | -2.24208600 | -1.28912200 | -1.11888400 |
| Cu | -0.73569200 | -0.07033600 | -1.37483300 |
| C  | 2.04244400  | 0.52805300  | -2.19165500 |
| N  | 0.85693600  | 0.54151800  | -2.13410700 |
| C  | -2.02578200 | 4.60948800  | -0.13868300 |
| C  | -1.23341000 | 3.59854000  | -0.68245500 |
| C  | -0.87285200 | 3.60961900  | -2.02550900 |
| C  | -1.32489900 | 4.65426200  | -2.82783200 |
| C  | -2.12191900 | 5.66569000  | -2.28900800 |
| C  | -2.47492900 | 5.65232700  | -0.94197500 |
| C  | -2.25070600 | 4.39802900  | 1.33291700  |
| H  | -0.25232300 | 2.81438900  | -2.43723900 |
| H  | -1.05623100 | 4.68220800  | -3.88113000 |

|   |             |             |             |
|---|-------------|-------------|-------------|
| H | -2.46969900 | 6.47387500  | -2.92825500 |
| H | -3.09559000 | 6.44362000  | -0.52585800 |
| C | -1.12205800 | -3.45028600 | -1.48903500 |
| C | -1.37883400 | -4.42083900 | -0.52181600 |
| C | -0.35422400 | -5.25397800 | -0.08306800 |
| C | 0.91874600  | -5.10212800 | -0.62872600 |
| C | 1.16711600  | -4.13916000 | -1.60850500 |
| C | 0.14300500  | -3.30147900 | -2.04718100 |
| C | -2.81734500 | -4.40075400 | -0.08234700 |
| H | -0.54246700 | -6.01393000 | 0.67251500  |
| H | 1.72680200  | -5.74875200 | -0.29559400 |
| H | 2.16261300  | -4.04775500 | -2.03623900 |
| H | 0.33042900  | -2.55009900 | -2.81474600 |
| H | -2.92439600 | -4.15280900 | 0.98294200  |
| H | -3.30586000 | -5.37101000 | -0.22616600 |
| H | -1.67672500 | 5.11699800  | 1.93118500  |
| H | -3.29796500 | 4.49685500  | 1.64093200  |
| H | -5.65725100 | -0.26907100 | 0.15078300  |
| H | -5.19372200 | 1.38176400  | 0.81757100  |
| H | -4.50077500 | -1.38097500 | 2.08301900  |
| H | -4.02770500 | 0.26780200  | 2.75360100  |
| C | -0.29826700 | 0.40662600  | 3.69835400  |
| C | 0.58013900  | 0.29763100  | 2.63614800  |
| C | 0.48529100  | -0.79019200 | 1.72469100  |
| C | -0.53798600 | -1.75249100 | 1.94908500  |
| C | -1.40777400 | -1.63430800 | 3.01398400  |
| C | -1.29933500 | -0.55100900 | 3.89628000  |
| H | -0.20293200 | 1.23881300  | 4.39212200  |
| H | 1.35934000  | 1.04715700  | 2.51279100  |
| H | -0.61038200 | -2.60078000 | 1.26647400  |
| H | -2.17373800 | -2.39075100 | 3.17265800  |
| H | -1.98336600 | -0.46012800 | 4.73625400  |
| C | 1.36501000  | -0.97166100 | 0.62808600  |
| H | 1.22796500  | -1.87181200 | 0.02245900  |
| C | 2.48322500  | -0.15518800 | 0.31865000  |
| C | 3.32512300  | -0.38859600 | -0.77454900 |
| H | 3.21155500  | -1.35519500 | -1.27514900 |
| C | 4.63953700  | 0.29722200  | -0.95183400 |
| H | 4.57583100  | 1.32120100  | -0.55788300 |
| H | 4.84717800  | 0.39007000  | -2.02600800 |
| C | 5.78944400  | -0.48610500 | -0.29125000 |
| C | 7.15345100  | 0.02195400  | -0.76811700 |
| C | 7.49895900  | 1.39472200  | -0.19845700 |
| C | 7.44494200  | 1.37872700  | 1.32567700  |

|   |            |             |             |
|---|------------|-------------|-------------|
| C | 6.08431600 | 0.90299900  | 1.82384600  |
| C | 5.73340900 | -0.46363700 | 1.23995900  |
| H | 8.49405800 | 1.70288600  | -0.54403300 |
| H | 7.92201500 | -0.69663000 | -0.44247300 |
| H | 7.18428400 | 0.03756400  | -1.86638100 |
| H | 5.68655300 | -1.53310200 | -0.62069200 |
| H | 8.22188100 | 0.69422500  | 1.70360800  |
| H | 7.67812500 | 2.37118200  | 1.73223200  |
| H | 6.07224500 | 0.85224800  | 2.92013200  |
| H | 5.31764900 | 1.64385400  | 1.54563100  |
| H | 6.45676700 | -1.20243000 | 1.61905500  |
| H | 4.74649200 | -0.79613600 | 1.59560700  |
| H | 6.79512400 | 2.14979500  | -0.58301600 |
| H | 2.67869000 | 0.73834500  | 0.91657300  |

### NHP-TMS

|    |             |             |             |
|----|-------------|-------------|-------------|
| C  | 2.88397500  | -0.85835300 | 1.58781300  |
| H  | 2.45031700  | -1.86140400 | 1.64963900  |
| H  | 3.97510100  | -0.95133100 | 1.64052800  |
| H  | 2.55274300  | -0.28337700 | 2.45987400  |
| C  | 3.03653400  | 1.73833800  | -0.06482100 |
| H  | 4.13292800  | 1.69476600  | -0.06789700 |
| H  | 2.70954300  | 2.25907100  | -0.96989300 |
| H  | 2.71395700  | 2.32923100  | 0.79712000  |
| C  | 2.90476700  | -0.96446800 | -1.51660000 |
| H  | 2.54477500  | -1.99698000 | -1.48186400 |
| H  | 2.51693300  | -0.49286200 | -2.42667300 |
| H  | 3.99879500  | -0.98216500 | -1.58827000 |
| Si | 2.38314500  | -0.00761200 | 0.00126300  |
| C  | -1.66704400 | 0.69946200  | -0.00247800 |
| C  | -1.63632500 | -0.68766300 | -0.00370600 |
| C  | -2.79595400 | -1.44166000 | -0.00331700 |
| C  | -4.00669800 | -0.74553200 | -0.00231600 |
| C  | -4.03731400 | 0.65142700  | -0.00120700 |
| C  | -2.85906100 | 1.40065400  | -0.00093200 |
| C  | -0.26623000 | 1.19420100  | -0.00047200 |
| C  | -0.21430800 | -1.10749200 | -0.00263800 |
| H  | -2.75941200 | -2.52804600 | -0.00359400 |
| H  | -4.94318900 | -1.29733300 | -0.00211800 |
| H  | -4.99775000 | 1.16050900  | -0.00020900 |
| H  | -2.87106400 | 2.48757700  | 0.00056300  |
| O  | 0.22455500  | -2.24081700 | 0.00303100  |
| O  | 0.10014200  | 2.35020000  | 0.00736400  |
| N  | 0.56580900  | 0.06005300  | -0.00628600 |

**10**

|    |             |             |             |
|----|-------------|-------------|-------------|
| C  | 0.52023600  | 3.50485800  | -1.22037400 |
| C  | 0.11819000  | 2.35504300  | -0.27340000 |
| C  | -0.20013000 | 3.83702700  | 0.00428800  |
| C  | -0.96122400 | 1.47294700  | -0.72445900 |
| O  | -2.05485600 | 2.04103000  | -1.16143800 |
| C  | -2.27072700 | -0.31491400 | -1.20560400 |
| C  | -2.97064500 | 0.99371000  | -1.64414000 |
| H  | -2.14395700 | -1.04689300 | -2.00939200 |
| H  | -3.04090700 | 1.13582000  | -2.72378000 |
| C  | 1.13422500  | 1.73808700  | 0.56061100  |
| O  | 2.21855400  | 2.40508000  | 0.85702200  |
| C  | 2.27528900  | 0.25001300  | 1.79331700  |
| C  | 3.12930500  | 1.51990400  | 1.60485700  |
| H  | 2.08716300  | -0.05932400 | 2.82453200  |
| H  | 3.38153300  | 2.05183900  | 2.52111000  |
| N  | 1.02793900  | 0.53649500  | 1.07385800  |
| N  | -0.93220400 | 0.17442000  | -0.78874400 |
| Cu | 0.52722600  | -0.87934600 | -0.11565100 |
| C  | 0.10135800  | -2.32777000 | -1.22093900 |
| N  | -0.25087100 | -3.19768800 | -1.91362500 |
| C  | 3.98349100  | -0.24226200 | 0.22493300  |
| C  | 2.90160100  | -0.75917300 | 0.89573100  |
| C  | 2.23536700  | -1.96699700 | 0.50040700  |
| C  | 2.84799000  | -2.71439300 | -0.57153900 |
| C  | 3.97816400  | -2.23311300 | -1.19244900 |
| C  | 4.54908200  | -1.00438000 | -0.80914200 |
| C  | 4.33444000  | 1.13071300  | 0.73806000  |
| H  | 1.63239200  | -2.51281700 | 1.23612900  |
| H  | 2.41933200  | -3.66873400 | -0.86110100 |
| H  | 4.44211000  | -2.80468800 | -1.98916100 |
| H  | 5.42821500  | -0.64048900 | -1.33635000 |
| C  | -3.08850400 | -0.80148400 | -0.04301500 |
| C  | -4.19271400 | 0.02550000  | 0.16326000  |
| C  | -5.05867800 | -0.22069500 | 1.22264000  |
| C  | -4.80195300 | -1.29948300 | 2.06451200  |
| C  | -3.70417500 | -2.13437700 | 1.84504800  |
| C  | -2.84002100 | -1.89412700 | 0.78144200  |
| C  | -4.29323500 | 1.08665300  | -0.89572000 |
| H  | -5.92250500 | 0.41830600  | 1.39114100  |
| H  | -5.46954900 | -1.50071600 | 2.89849300  |
| H  | -3.52856000 | -2.98006200 | 2.50458300  |
| H  | -1.99656200 | -2.55863300 | 0.59702900  |

|   |             |            |             |
|---|-------------|------------|-------------|
| H | -4.45009200 | 2.09674900 | -0.50143400 |
| H | -5.12244400 | 0.88343900 | -1.58408100 |
| H | 5.24549500  | 1.10857800 | 1.34679400  |
| H | 4.50238900  | 1.85988300 | -0.06061600 |
| H | -0.01831500 | 3.50933500 | -2.16349000 |
| H | 1.58851600  | 3.69071600 | -1.27992100 |
| H | -1.25630500 | 4.08329400 | -0.04907800 |
| H | 0.34847100  | 4.26626400 | 0.83742600  |

### TS9<sub>s</sub>

|    |             |             |             |
|----|-------------|-------------|-------------|
| C  | -3.03117800 | -0.71256100 | 3.41397400  |
| C  | -1.90206600 | -0.42143800 | 2.41638500  |
| C  | -2.06157800 | 0.34340900  | 3.73446100  |
| C  | -0.82997400 | -1.43101600 | 2.35716000  |
| O  | -0.50295000 | -1.98029700 | 3.53799500  |
| C  | 0.67907500  | -2.95306800 | 1.76195800  |
| C  | 0.66552000  | -2.79796700 | 3.29384500  |
| H  | 0.26891000  | -3.90071200 | 1.38612400  |
| H  | 0.52563500  | -3.73004300 | 3.84397600  |
| C  | -2.28552900 | 0.29800100  | 1.18661100  |
| O  | -3.26851000 | 1.19194300  | 1.34949300  |
| C  | -2.52238500 | 1.09237900  | -0.87185400 |
| C  | -3.45004000 | 1.88175000  | 0.08304500  |
| H  | -1.80392300 | 1.71840200  | -1.41952300 |
| H  | -3.15161200 | 2.92239400  | 0.24988900  |
| N  | -1.77669500 | 0.18434700  | 0.01449800  |
| N  | -0.20864300 | -1.86208600 | 1.32112600  |
| Cu | -0.37292600 | -1.25266100 | -0.62542400 |
| C  | 0.57086700  | -0.50157900 | -2.16379600 |
| N  | 0.58131500  | -0.26689000 | -3.31575500 |
| C  | -4.79349200 | 0.65307600  | -1.47127200 |
| C  | -3.46746700 | 0.34438400  | -1.77171200 |
| C  | -3.14853400 | -0.57352700 | -2.76602300 |
| C  | -4.18578700 | -1.20266800 | -3.44974100 |
| C  | -5.51548500 | -0.90866700 | -3.14235800 |
| C  | -5.82823000 | 0.02443900  | -2.15678900 |
| C  | -4.88473400 | 1.71844600  | -0.41397400 |
| H  | -2.10726000 | -0.79265500 | -3.00063300 |
| H  | -3.95908600 | -1.92252100 | -4.23351000 |
| H  | -6.31604400 | -1.40789100 | -3.68360900 |
| H  | -6.86642600 | 0.25900100  | -1.92891000 |
| C  | 2.10655100  | -2.73049800 | 1.37017500  |
| C  | 2.83029100  | -2.20931000 | 2.44348300  |
| C  | 4.17995100  | -1.91077500 | 2.29164800  |



|   |             |             |             |
|---|-------------|-------------|-------------|
| C | 4.78603300  | -2.14362400 | 1.05745800  |
| C | 4.05666800  | -2.66663300 | -0.01227900 |
| C | 2.70290400  | -2.96305400 | 0.13662000  |
| C | 1.96372300  | -2.06067500 | 3.66508700  |
| H | 4.75774600  | -1.51295000 | 3.12344700  |
| H | 5.84262700  | -1.91907200 | 0.92465200  |
| H | 4.55141200  | -2.85518100 | -0.96305600 |
| H | 2.12707800  | -3.37928200 | -0.68990600 |
| H | 1.73711500  | -1.00469200 | 3.87230200  |
| H | 2.43032100  | -2.46475100 | 4.56970900  |
| H | -5.25191400 | 2.66324500  | -0.83442100 |
| H | -5.55578800 | 1.46231900  | 0.41428500  |
| H | -2.95945900 | -1.66376400 | 3.93149700  |
| H | -4.02312100 | -0.42437900 | 3.08096700  |
| H | -1.30146000 | 0.14248900  | 4.48307700  |
| H | -2.37507000 | 1.37907200  | 3.63608800  |
| C | -1.26651000 | 5.22585900  | 0.39842900  |
| C | -0.49416600 | 4.13598100  | 0.03020500  |
| C | -0.18299000 | 3.13758100  | 0.97192400  |
| C | -0.65991200 | 3.27452300  | 2.28649600  |
| C | -1.43185600 | 4.36683800  | 2.65302300  |
| C | -1.73873000 | 5.34292200  | 1.70752100  |
| H | -1.50629500 | 5.99002200  | -0.33576600 |
| H | -0.14117400 | 4.05114000  | -0.99531000 |
| H | -0.40660100 | 2.51144600  | 3.02140800  |
| H | -1.79484000 | 4.45858700  | 3.67332300  |
| H | -2.34621600 | 6.19924500  | 1.98863700  |
| C | 0.57507100  | 1.95645600  | 0.63462600  |
| H | 0.62483900  | 1.18601500  | 1.40876100  |
| C | 1.25148800  | 1.71324000  | -0.52189900 |
| C | 1.95943200  | 0.50056100  | -0.70334600 |
| H | 1.92623800  | -0.21884900 | 0.12333300  |
| C | 3.14846000  | 0.40406200  | -1.58784800 |
| H | 2.99228500  | 0.98852700  | -2.50125600 |
| H | 3.30381000  | -0.64143000 | -1.88202500 |
| C | 4.40797700  | 0.87643400  | -0.81368500 |
| C | 5.67243700  | 0.42421900  | -1.55455200 |
| C | 5.90635400  | 1.20483900  | -2.84410600 |
| C | 5.96711800  | 2.70396700  | -2.56982000 |
| C | 4.71077000  | 3.18639900  | -1.85151600 |
| C | 4.46811000  | 2.38850600  | -0.57375800 |
| H | 6.83464800  | 0.86366600  | -3.31951000 |
| H | 6.53097200  | 0.58262100  | -0.88264300 |
| H | 5.62627000  | -0.65521900 | -1.75534700 |

|   |             |             |             |
|---|-------------|-------------|-------------|
| H | 4.39106500  | 0.36942900  | 0.16518500  |
| H | 6.84282700  | 2.91381600  | -1.93423000 |
| H | 6.11657100  | 3.26147900  | -3.50302900 |
| H | 4.79432700  | 4.25337100  | -1.60882300 |
| H | 3.84575300  | 3.09797400  | -2.52798900 |
| H | 5.30141300  | 2.57798100  | 0.12070900  |
| H | 3.56274700  | 2.74172700  | -0.06243000 |
| H | 5.10007200  | 0.99384500  | -3.56394000 |
| H | 1.27853500  | 2.44277400  | -1.33270700 |
| N | -1.24620000 | -3.04102500 | -1.43837500 |
| C | -1.78876300 | -3.86766600 | -2.04218200 |
| C | -2.46864000 | -4.89697700 | -2.79731300 |
| H | -2.14536300 | -5.88524200 | -2.46012900 |
| H | -3.54915600 | -4.80741000 | -2.65680600 |
| H | -2.23884400 | -4.79036200 | -3.86080200 |

### TS9<sub>R</sub>

|    |             |             |             |
|----|-------------|-------------|-------------|
| C  | 0.24932900  | -4.36178500 | -1.88066500 |
| C  | -0.00665700 | -2.91682400 | -1.43268100 |
| C  | -0.65993100 | -3.52733000 | -2.67840200 |
| C  | -0.86372900 | -2.76685900 | -0.23979100 |
| O  | -1.83031000 | -3.69116100 | -0.14807200 |
| C  | -1.80786000 | -2.23967600 | 1.70458300  |
| C  | -2.57427000 | -3.42346600 | 1.06342400  |
| H  | -1.29709900 | -2.49741300 | 2.64231600  |
| H  | -2.54892900 | -4.34136600 | 1.65534700  |
| C  | 1.09247800  | -1.96555100 | -1.67703700 |
| O  | 1.83693100  | -2.24682500 | -2.75818700 |
| C  | 2.57480700  | -0.30704000 | -1.66812100 |
| C  | 2.98691700  | -1.37432300 | -2.70169400 |
| H  | 2.25977400  | 0.64962400  | -2.10980700 |
| H  | 3.14684800  | -0.98856600 | -3.71000100 |
| N  | 1.41136600  | -0.92436600 | -0.99646300 |
| N  | -0.77064000 | -1.90759500 | 0.70788000  |
| Cu | 0.85853200  | -0.64508300 | 1.03412800  |
| C  | 0.56620500  | 1.03490000  | 2.03222400  |
| N  | 0.48028400  | 1.55560400  | 3.08330800  |
| C  | 4.67587800  | -1.20121100 | -1.00663100 |
| C  | 3.76190400  | -0.17636600 | -0.76379700 |
| C  | 3.99541600  | 0.78227600  | 0.21388700  |
| C  | 5.16308900  | 0.69850800  | 0.96859600  |
| C  | 6.07651600  | -0.33070200 | 0.73530700  |
| C  | 5.84251000  | -1.28436100 | -0.25499800 |
| C  | 4.21564800  | -2.09614800 | -2.12433300 |

|   |             |             |             |
|---|-------------|-------------|-------------|
| H | 3.28228300  | 1.59021200  | 0.38254200  |
| H | 5.36765200  | 1.44132900  | 1.73548900  |
| H | 6.98797400  | -0.38286700 | 1.32684800  |
| H | 6.56846900  | -2.07370800 | -0.44162800 |
| C | -2.85308900 | -1.17887800 | 1.90488900  |
| C | -4.07975200 | -1.58312200 | 1.37882900  |
| C | -5.19453300 | -0.75995300 | 1.49084200  |
| C | -5.06051400 | 0.47534600  | 2.11916600  |
| C | -3.83221000 | 0.87582700  | 2.64729400  |
| C | -2.71899400 | 0.04403400  | 2.55308900  |
| C | -4.00008600 | -2.94865000 | 0.75749000  |
| H | -6.15498400 | -1.07311300 | 1.08480200  |
| H | -5.92377300 | 1.13229100  | 2.20406000  |
| H | -3.74562000 | 1.83932400  | 3.14493300  |
| H | -1.76161900 | 0.34759400  | 2.97317800  |
| H | -4.16122000 | -2.91452800 | -0.33000200 |
| H | -4.75154900 | -3.63523000 | 1.16391800  |
| H | 4.99153200  | -2.26270100 | -2.87948100 |
| H | 3.91792100  | -3.08807200 | -1.75504800 |
| H | -0.17720700 | -5.12491800 | -1.23830600 |
| H | 1.24663200  | -4.55627400 | -2.26191300 |
| H | -1.72823600 | -3.70562900 | -2.59919300 |
| H | -0.31014400 | -3.13440700 | -3.62787000 |
| C | -5.45744700 | 1.35628600  | -1.34581100 |
| C | -4.17044100 | 1.60713000  | -0.89964000 |
| C | -3.12730800 | 0.71574500  | -1.21035500 |
| C | -3.41903400 | -0.43124000 | -1.97086200 |
| C | -4.70956800 | -0.68498100 | -2.40711900 |
| C | -5.73032500 | 0.21305500  | -2.09723900 |
| H | -6.25751900 | 2.05114600  | -1.10438300 |
| H | -3.96923300 | 2.49964000  | -0.31133100 |
| H | -2.60974500 | -1.12016400 | -2.21514400 |
| H | -4.92267100 | -1.57481400 | -2.99373500 |
| H | -6.74279700 | 0.02287400  | -2.44441500 |
| C | -1.76242400 | 0.93075200  | -0.80782300 |
| H | -1.04288500 | 0.19297000  | -1.17514800 |
| C | -1.24964800 | 1.93775200  | -0.04187100 |
| C | 0.15233100  | 2.04419000  | 0.12766000  |
| H | 0.74922300  | 1.35591700  | -0.47065300 |
| C | 0.81296100  | 3.33008600  | 0.48328700  |
| H | 1.74130700  | 3.13473800  | 1.03222200  |
| H | 0.16582700  | 3.91102000  | 1.15152400  |
| C | 1.18131400  | 4.11703800  | -0.79778200 |
| C | -0.02630600 | 4.70230300  | -1.53753400 |

|   |             |             |             |
|---|-------------|-------------|-------------|
| C | -0.68728300 | 5.84372100  | -0.76938200 |
| C | 0.32244400  | 6.93656200  | -0.43236000 |
| C | 1.51954200  | 6.37198500  | 0.32678500  |
| C | 2.17168700  | 5.23671600  | -0.45562400 |
| H | -1.51484300 | 6.25550400  | -1.36061200 |
| H | 0.33086000  | 5.09090300  | -2.50368800 |
| H | -0.75915600 | 3.91920300  | -1.77622200 |
| H | 1.69412600  | 3.40975100  | -1.47175300 |
| H | 0.67937000  | 7.39221100  | -1.37032800 |
| H | -0.15626900 | 7.73912000  | 0.14277100  |
| H | 2.25771700  | 7.16059700  | 0.51977300  |
| H | 1.19394300  | 6.01125500  | 1.31493600  |
| H | 2.56623900  | 5.63952400  | -1.40147600 |
| H | 3.02976900  | 4.82230000  | 0.09208000  |
| H | -1.13940500 | 5.46550700  | 0.16133200  |
| H | -1.88402300 | 2.68674800  | 0.43320300  |
| N | 2.34257400  | -1.76992800 | 2.01164800  |
| C | 3.32829700  | -2.19084800 | 2.45148600  |
| C | 4.56035700  | -2.70969900 | 3.00410200  |
| H | 5.16262200  | -3.16269400 | 2.21168800  |
| H | 5.13085700  | -1.89650800 | 3.46187200  |
| H | 4.34315200  | -3.46424100 | 3.76472200  |

**TS9<sub>s</sub><sup>Z</sup>**

|    |             |             |             |
|----|-------------|-------------|-------------|
| C  | 3.51664300  | 2.85224700  | 0.29590200  |
| C  | 2.20923300  | 2.05794100  | 0.49114000  |
| C  | 2.65727800  | 3.15238800  | 1.45000100  |
| C  | 1.13189800  | 2.39734400  | -0.45655100 |
| O  | 1.02599600  | 3.70417000  | -0.72929300 |
| C  | -0.45446300 | 2.41556700  | -2.02156900 |
| C  | -0.08955800 | 3.86636000  | -1.63708400 |
| H  | -0.16498800 | 2.12568100  | -3.04105900 |
| H  | 0.26930300  | 4.47323000  | -2.47041800 |
| C  | 2.39026100  | 0.65834100  | 0.92028500  |
| O  | 3.26080800  | 0.49235100  | 1.92492200  |
| C  | 2.47679100  | -1.55278300 | 1.08790200  |
| C  | 3.32300800  | -0.92660300 | 2.22297400  |
| H  | 1.69209100  | -2.23665300 | 1.43775700  |
| H  | 2.90784300  | -1.05619500 | 3.22756900  |
| N  | 1.85386000  | -0.39472800 | 0.42347300  |
| N  | 0.33949600  | 1.60419800  | -1.08134000 |
| Cu | 0.37563700  | -0.40038800 | -1.07373500 |
| C  | -0.34521600 | -2.17768900 | -1.20034000 |
| N  | -0.27668500 | -3.31299800 | -1.49367000 |

|   |             |             |             |
|---|-------------|-------------|-------------|
| C | 4.77780300  | -2.10573200 | 0.73706400  |
| C | 3.49358400  | -2.22888700 | 0.20497100  |
| C | 3.27481700  | -2.88573400 | -1.00199600 |
| C | 4.37136300  | -3.40747000 | -1.68430800 |
| C | 5.66023000  | -3.27146100 | -1.16453100 |
| C | 5.87180200  | -2.62470800 | 0.05040100  |
| C | 4.75360000  | -1.43935800 | 2.08399900  |
| H | 2.26654100  | -2.99329300 | -1.39952900 |
| H | 4.22243900  | -3.92409300 | -2.62966800 |
| H | 6.50652900  | -3.68225000 | -1.71022500 |
| H | 6.87584200  | -2.53247300 | 0.46020100  |
| C | -1.92914600 | 2.31683500  | -1.77843700 |
| C | -2.40348200 | 3.46083600  | -1.13791400 |
| C | -3.74548000 | 3.55350300  | -0.78296100 |
| C | -4.59912800 | 2.49494100  | -1.08656300 |
| C | -4.12466700 | 1.36447800  | -1.75500100 |
| C | -2.77858000 | 1.26590700  | -2.10346700 |
| C | -1.31188600 | 4.47443300  | -0.93294100 |
| H | -4.12612600 | 4.44278800  | -0.28318600 |
| H | -5.65143200 | 2.55817600  | -0.82045000 |
| H | -4.81484800 | 0.56487300  | -2.01753900 |
| H | -2.40107500 | 0.39455800  | -2.64036900 |
| H | -1.08713500 | 4.63144500  | 0.13197200  |
| H | -1.57412400 | 5.45482600  | -1.34584000 |
| H | 4.97681900  | -2.15928500 | 2.88148300  |
| H | 5.47495000  | -0.62079800 | 2.18969700  |
| H | 3.52330600  | 3.53391600  | -0.54898600 |
| H | 4.42944500  | 2.28707700  | 0.46041900  |
| H | 2.05728400  | 4.05695700  | 1.43375800  |
| H | 2.97618700  | 2.80803300  | 2.42833900  |
| C | -1.67074400 | 2.67932900  | 2.10832900  |
| C | -1.75718200 | 1.30410400  | 1.94127000  |
| C | -0.80053300 | 0.45372400  | 2.52413100  |
| C | 0.20204000  | 1.02803800  | 3.32875500  |
| C | 0.28876700  | 2.40205500  | 3.48717400  |
| C | -0.64007900 | 3.23421200  | 2.86343900  |
| H | -2.43425100 | 3.31653600  | 1.66808800  |
| H | -2.61644200 | 0.89359500  | 1.41528700  |
| H | 0.92417500  | 0.37802000  | 3.82138600  |
| H | 1.07194200  | 2.82783600  | 4.10909700  |
| H | -0.58218000 | 4.31217100  | 2.99632300  |
| C | -0.80286200 | -0.98887200 | 2.38653600  |
| H | -0.32403300 | -1.52029900 | 3.21227800  |
| C | -1.32076900 | -1.77723000 | 1.40312800  |

|   |             |             |             |
|---|-------------|-------------|-------------|
| H | -1.28329500 | -2.85771600 | 1.54933500  |
| C | -1.88850000 | -1.33909000 | 0.17050900  |
| H | -1.84398500 | -0.27414700 | -0.06990500 |
| C | -3.00572300 | -2.08244500 | -0.47049200 |
| H | -2.85249600 | -3.16230300 | -0.36639600 |
| H | -3.03778000 | -1.85663500 | -1.54338400 |
| C | -4.35402400 | -1.64089500 | 0.15999900  |
| C | -5.51195300 | -2.10045100 | -0.73549600 |
| C | -5.72065600 | -3.61086200 | -0.69185800 |
| C | -5.93802400 | -4.08936700 | 0.74001700  |
| C | -4.79143900 | -3.66021500 | 1.64974700  |
| C | -4.57638700 | -2.15056300 | 1.58796000  |
| H | -6.57686300 | -3.88355700 | -1.32144900 |
| H | -6.42873000 | -1.60358900 | -0.38123600 |
| H | -5.34869400 | -1.76243000 | -1.76886100 |
| H | -4.35963400 | -0.53850700 | 0.17739500  |
| H | -6.87634200 | -3.65525500 | 1.12193100  |
| H | -6.06381700 | -5.17895300 | 0.76718600  |
| H | -4.99251300 | -3.96010900 | 2.68593700  |
| H | -3.87142600 | -4.18997100 | 1.35629300  |
| H | -5.47711900 | -1.65174300 | 1.97777300  |
| H | -3.75291900 | -1.84808300 | 2.24927700  |
| H | -4.84844800 | -4.12442700 | -1.12549300 |
| N | 1.75431900  | -0.32955500 | -2.99013500 |
| C | 2.89790600  | -0.18706800 | -2.83496800 |
| C | 4.31354200  | 0.00425300  | -2.60320300 |
| H | 4.58929800  | 1.04592900  | -2.78917500 |
| H | 4.54159000  | -0.25015900 | -1.56042000 |
| H | 4.89977100  | -0.64817900 | -3.25592500 |

### TS10<sub>s</sub>

|   |             |             |            |
|---|-------------|-------------|------------|
| C | -2.80908900 | -1.38325400 | 3.76603900 |
| C | -1.99076000 | -0.90325300 | 2.56698400 |
| C | -1.67123800 | -0.48504700 | 4.00963400 |
| C | -1.08550900 | -1.89466300 | 1.95788300 |
| O | -0.66025600 | -2.86152700 | 2.78752900 |
| C | 0.06642900  | -3.20968600 | 0.58720200 |
| C | 0.31202700  | -3.63437600 | 2.04603400 |
| H | -0.55451700 | -3.90417500 | 0.00416100 |
| H | 0.10815800  | -4.68686200 | 2.25137100 |
| C | -2.60980000 | 0.12765600  | 1.70976500 |
| O | -3.48561800 | 0.92713400  | 2.33770000 |
| C | -3.17315300 | 1.53557600  | 0.08638300 |
| C | -4.01721600 | 1.84273100  | 1.34597500 |

|    |             |             |             |
|----|-------------|-------------|-------------|
| H  | -2.48249500 | 2.34195100  | -0.20216000 |
| H  | -3.87424500 | 2.84972300  | 1.74594600  |
| N  | -2.37558100 | 0.36368500  | 0.47363800  |
| N  | -0.68641800 | -1.95416200 | 0.73977600  |
| Cu | -1.00177700 | -0.60828500 | -0.77288300 |
| C  | -0.08217200 | 0.73436000  | -1.86512900 |
| N  | -0.06308300 | 1.32748100  | -2.88054100 |
| C  | -5.46862800 | 1.18968600  | -0.45834700 |
| C  | -4.17721000 | 1.21885900  | -0.98092800 |
| C  | -3.93061900 | 0.95145400  | -2.32231600 |
| C  | -5.01007500 | 0.64577200  | -3.14796300 |
| C  | -6.30685200 | 0.61238900  | -2.63052600 |
| C  | -6.54559300 | 0.88612000  | -1.28525300 |
| C  | -5.48148100 | 1.52635300  | 1.00860600  |
| H  | -2.91285600 | 0.97977300  | -2.71277600 |
| H  | -4.84412100 | 0.44312300  | -4.20434600 |
| H  | -7.14156800 | 0.37780800  | -3.28724000 |
| H  | -7.55966500 | 0.86582800  | -0.89049800 |
| C  | 1.43720700  | -3.04514500 | 0.00776500  |
| C  | 2.40061600  | -3.09490900 | 1.01754400  |
| C  | 3.75173800  | -3.04381700 | 0.69073000  |
| C  | 4.11564000  | -2.93884000 | -0.65247100 |
| C  | 3.14703300  | -2.86352300 | -1.65493800 |
| C  | 1.79238900  | -2.91469100 | -1.32934500 |
| C  | 1.75782600  | -3.22875500 | 2.37258700  |
| H  | 4.51482500  | -3.10139600 | 1.46492800  |
| H  | 5.17036700  | -2.91221100 | -0.92285600 |
| H  | 3.45258900  | -2.77950600 | -2.69525900 |
| H  | 1.02609500  | -2.87614400 | -2.10303000 |
| H  | 1.75528900  | -2.26565900 | 2.90469400  |
| H  | 2.26303200  | -3.94983800 | 3.02295800  |
| H  | -6.13759300 | 2.37602200  | 1.23036200  |
| H  | -5.83519200 | 0.68932800  | 1.62422800  |
| H  | -2.70607000 | -2.43445000 | 4.01289500  |
| H  | -3.81179000 | -0.97320000 | 3.82910400  |
| H  | -0.75565500 | -0.90060300 | 4.42037200  |
| H  | -1.87297400 | 0.55451600  | 4.25097100  |
| C  | -0.32800600 | 4.59285800  | 0.40593800  |
| C  | 0.34112000  | 3.54291600  | -0.20066000 |
| C  | 0.43682400  | 2.30073300  | 0.44764800  |
| C  | -0.14752100 | 2.13909500  | 1.71230800  |
| C  | -0.80319500 | 3.19895800  | 2.32539300  |
| C  | -0.90003500 | 4.42349100  | 1.66889000  |
| H  | -0.41022800 | 5.54873700  | -0.10381900 |

|   |             |             |             |
|---|-------------|-------------|-------------|
| H | 0.76257800  | 3.66722700  | -1.19576900 |
| H | -0.05761600 | 1.17824200  | 2.21886300  |
| H | -1.24109400 | 3.07348300  | 3.31287700  |
| H | -1.42210700 | 5.25125400  | 2.14204200  |
| C | 1.18751000  | 1.18816500  | -0.10697200 |
| C | 2.41342200  | 1.35891300  | -0.82275000 |
| H | 2.59171900  | 2.29010500  | -1.36063700 |
| C | 3.36862400  | 0.40804400  | -0.75816200 |
| H | 3.15349700  | -0.50639400 | -0.19605500 |
| C | 4.72499200  | 0.51240000  | -1.34002600 |
| H | 4.83601100  | 1.46210100  | -1.87877500 |
| H | 4.83764400  | -0.29106700 | -2.08714500 |
| C | 5.82164000  | 0.32199700  | -0.27593000 |
| C | 7.20885500  | 0.24286700  | -0.91662700 |
| C | 7.68180900  | 1.58930000  | -1.45879400 |
| C | 7.64182500  | 2.66001800  | -0.37245500 |
| C | 6.25497000  | 2.76992600  | 0.25400600  |
| C | 5.79371800  | 1.41905900  | 0.79309500  |
| H | 8.69799200  | 1.49132700  | -1.86152100 |
| H | 7.92276900  | -0.09698800 | -0.15006300 |
| H | 7.21242500  | -0.52065200 | -1.70817600 |
| H | 5.61313000  | -0.64260500 | 0.21652600  |
| H | 8.36539500  | 2.39432500  | 0.41567600  |
| H | 7.96172400  | 3.62939000  | -0.77550000 |
| H | 6.25803200  | 3.51201700  | 1.06249500  |
| H | 5.53822000  | 3.14222600  | -0.49594600 |
| H | 6.46568300  | 1.11772300  | 1.61166700  |
| H | 4.78824600  | 1.50053700  | 1.23053900  |
| H | 7.05015600  | 1.90086900  | -2.30515800 |
| H | 1.09936400  | 0.24329600  | 0.43712200  |
| N | -1.98135100 | -1.85578300 | -2.18543300 |
| C | -2.74143300 | -2.30677000 | -2.93466900 |
| C | -3.70749000 | -2.84917700 | -3.86401900 |
| H | -3.87248800 | -3.91068900 | -3.66259200 |
| H | -4.65567900 | -2.31277500 | -3.75384500 |
| H | -3.34828900 | -2.73156800 | -4.88972300 |

### TS10<sub>R</sub>

|   |             |             |            |
|---|-------------|-------------|------------|
| C | -0.80977800 | 1.29144500  | 4.15642700 |
| C | -0.76974000 | 0.93855600  | 2.67480500 |
| C | -0.35982200 | -0.05606100 | 3.77228800 |
| C | -2.06648700 | 0.69372700  | 2.01067900 |
| O | -3.09020900 | 0.41515400  | 2.83119400 |
| C | -3.75389800 | 0.52924100  | 0.57656500 |



|    |             |             |             |
|----|-------------|-------------|-------------|
| C  | -4.27318300 | 0.24411700  | 2.00567700  |
| H  | -4.17323600 | 1.43947600  | 0.12635900  |
| H  | -5.00358500 | 0.97143200  | 2.36711600  |
| C  | 0.33914200  | 1.50957200  | 1.87988400  |
| O  | 1.38371400  | 1.94816200  | 2.59939900  |
| C  | 1.74078100  | 2.17145600  | 0.28267200  |
| C  | 2.33150900  | 2.52877400  | 1.66798600  |
| H  | 2.31930600  | 1.42896400  | -0.28713300 |
| H  | 3.30023100  | 2.06736000  | 1.87785900  |
| N  | 0.43287600  | 1.58001900  | 0.60320400  |
| N  | -2.31188400 | 0.73459500  | 0.75414700  |
| Cu | -0.95727700 | 0.84557700  | -0.79624400 |
| C  | -0.18720900 | -0.46362700 | -2.04130400 |
| N  | 0.06660000  | -0.76399900 | -3.14965400 |
| C  | 1.95315700  | 4.54148700  | 0.40523500  |
| C  | 1.63479500  | 3.48013700  | -0.43915300 |
| C  | 1.27041000  | 3.69002500  | -1.76322900 |
| C  | 1.21136700  | 4.99821700  | -2.23730500 |
| C  | 1.51667100  | 6.06761300  | -1.39253300 |
| C  | 1.89403200  | 5.84781000  | -0.06954400 |
| C  | 2.35521100  | 4.06132000  | 1.77316700  |
| H  | 1.04059400  | 2.84543900  | -2.41248900 |
| H  | 0.94165000  | 5.18852500  | -3.27417900 |
| H  | 1.47197700  | 7.08416300  | -1.77655400 |
| H  | 2.14549300  | 6.68572500  | 0.57773500  |
| C  | -4.09638400 | -0.69823100 | -0.21132300 |
| C  | -4.72617400 | -1.64666800 | 0.59198300  |
| C  | -5.17194800 | -2.83974800 | 0.03271900  |
| C  | -4.94675300 | -3.07702300 | -1.32155100 |
| C  | -4.28256700 | -2.13797000 | -2.11252200 |
| C  | -3.86068600 | -0.93057500 | -1.56165200 |
| C  | -4.80674400 | -1.19502800 | 2.02634000  |
| H  | -5.67928200 | -3.58384500 | 0.64473600  |
| H  | -5.28410900 | -4.01099600 | -1.76592200 |
| H  | -4.10457800 | -2.34583500 | -3.16487800 |
| H  | -3.35411000 | -0.18103700 | -2.16987300 |
| H  | -4.18372100 | -1.81652200 | 2.68547400  |
| H  | -5.82550500 | -1.24189300 | 2.42741900  |
| H  | 3.34472900  | 4.43076000  | 2.06567100  |
| H  | 1.65546500  | 4.39066800  | 2.55206200  |
| H  | -1.80103700 | 1.40299700  | 4.58259900  |
| H  | -0.06728500 | 2.01126500  | 4.48340900  |
| H  | -1.03635800 | -0.89385800 | 3.91766100  |
| H  | 0.70068800  | -0.28959800 | 3.81578100  |

|   |             |             |             |
|---|-------------|-------------|-------------|
| C | -2.25526300 | -4.18350300 | 0.47833600  |
| C | -1.48147100 | -3.03324100 | 0.49307800  |
| C | -0.49241600 | -2.83146100 | -0.48291400 |
| C | -0.32726900 | -3.77974900 | -1.50629200 |
| C | -1.12264400 | -4.91157200 | -1.53312600 |
| C | -2.07804300 | -5.12063700 | -0.53554100 |
| H | -3.00598900 | -4.34176200 | 1.24847700  |
| H | -1.61620100 | -2.28930300 | 1.27830100  |
| H | 0.40539300  | -3.60650400 | -2.29133700 |
| H | -1.00075600 | -5.64073700 | -2.32929800 |
| H | -2.69498000 | -6.01565900 | -0.55801000 |
| C | 0.39978700  | -1.70764900 | -0.30529600 |
| C | 1.80368800  | -1.76036500 | -0.59247900 |
| H | 2.14809900  | -2.39365900 | -1.40798500 |
| C | 2.67237800  | -1.11229300 | 0.21126500  |
| H | 2.24568600  | -0.51300700 | 1.02231400  |
| C | 4.15554200  | -1.11321600 | 0.13511100  |
| H | 4.54238300  | -1.27901700 | 1.15214900  |
| H | 4.45646500  | -0.07286500 | -0.08946300 |
| C | 4.80523000  | -2.06350400 | -0.87042800 |
| C | 6.27160900  | -1.69103400 | -1.11651600 |
| C | 7.17005600  | -2.00779000 | 0.07517700  |
| C | 7.06228900  | -3.48003600 | 0.45721300  |
| C | 5.61513200  | -3.86528400 | 0.74436100  |
| C | 4.70868600  | -3.53369000 | -0.43884500 |
| H | 8.20916200  | -1.74694600 | -0.16283000 |
| H | 6.62965000  | -2.26287300 | -1.98651100 |
| H | 6.34670000  | -0.62905700 | -1.38945800 |
| H | 4.27513000  | -1.94398900 | -1.82848000 |
| H | 7.43648300  | -4.09354300 | -0.37851700 |
| H | 7.70011300  | -3.70499800 | 1.32147300  |
| H | 5.54028300  | -4.93540300 | 0.97595100  |
| H | 5.27075500  | -3.33669900 | 1.64726600  |
| H | 5.00524400  | -4.15987000 | -1.29435400 |
| H | 3.66886300  | -3.80134500 | -0.20528700 |
| H | 6.88915600  | -1.38346400 | 0.93824400  |
| H | 0.12666300  | -1.02941900 | 0.50427700  |
| N | -1.81965900 | 2.39607400  | -1.92446400 |
| C | -2.16399200 | 3.36477100  | -2.45800500 |
| C | -2.56896100 | 4.58692400  | -3.11572600 |
| H | -1.80618000 | 5.35512900  | -2.95334500 |
| H | -2.68205100 | 4.41716100  | -4.18950600 |
| H | -3.52018000 | 4.93812700  | -2.70732900 |

**4<sub>S</sub>**

|   |             |             |             |
|---|-------------|-------------|-------------|
| C | -0.90372000 | 3.19016200  | -0.47509800 |
| N | -1.02140000 | 4.19533700  | -1.04596100 |
| C | 4.03473900  | -1.22104800 | -1.23602500 |
| C | 2.86046300  | -0.53420600 | -0.96043300 |
| C | 2.68137300  | 0.10819800  | 0.27325900  |
| C | 3.70647700  | 0.02265800  | 1.22368800  |
| C | 4.88285400  | -0.66439600 | 0.94796500  |
| C | 5.05199800  | -1.28710200 | -0.28481300 |
| H | 4.15648700  | -1.71433000 | -2.19770400 |
| H | 2.06869700  | -0.50674000 | -1.70723300 |
| H | 3.57298800  | 0.50831300  | 2.18964800  |
| H | 5.66780000  | -0.71654500 | 1.69880600  |
| H | 5.96906100  | -1.82884900 | -0.50369200 |
| C | 1.46723200  | 0.85182600  | 0.61207100  |
| H | 1.36989400  | 1.13008900  | 1.66519300  |
| C | 0.49142600  | 1.21487000  | -0.22650700 |
| C | -0.76307600 | 1.90920100  | 0.22370400  |
| H | -0.67953100 | 2.13615800  | 1.29806300  |
| C | -2.03428000 | 1.06094800  | -0.00051800 |
| H | -2.14230900 | 0.88122300  | -1.07997400 |
| H | -2.89907100 | 1.67262500  | 0.29340900  |
| C | -2.01514200 | -0.25639500 | 0.79111900  |
| C | -3.39519500 | -0.58957900 | 1.36818600  |
| C | -4.39253000 | -1.00161600 | 0.29027600  |
| C | -3.86700700 | -2.19305100 | -0.50318400 |
| C | -2.50098500 | -1.88666100 | -1.10760100 |
| C | -1.50751500 | -1.44616300 | -0.03612900 |
| H | -5.36175900 | -1.24010100 | 0.74695800  |
| H | -3.28343100 | -1.42390500 | 2.07878500  |
| H | -3.77510000 | 0.26486600  | 1.94538800  |
| H | -1.32427100 | -0.11981100 | 1.63944400  |
| H | -3.77444200 | -3.05885300 | 0.17294400  |
| H | -4.57942500 | -2.48203300 | -1.28662600 |
| H | -2.10877600 | -2.76368900 | -1.63839400 |
| H | -2.61226200 | -1.09762600 | -1.86853600 |
| H | -1.33480500 | -2.28994400 | 0.65065900  |
| H | -0.53260500 | -1.21183300 | -0.48615900 |
| H | -4.57665100 | -0.15897300 | -0.39558000 |
| H | 0.54663600  | 0.98672300  | -1.29343100 |

**4<sub>R</sub>**

|   |            |            |             |
|---|------------|------------|-------------|
| C | 0.90371700 | 3.19015200 | -0.47509900 |
| N | 1.02139400 | 4.19532500 | -1.04596600 |

|   |             |             |             |
|---|-------------|-------------|-------------|
| C | -4.03474300 | -1.22105700 | -1.23602100 |
| C | -2.86046900 | -0.53421000 | -0.96043200 |
| C | -2.68138300 | 0.10820200  | 0.27325600  |
| C | -3.70648800 | 0.02266500  | 1.22368400  |
| C | -4.88286200 | -0.66439400 | 0.94796300  |
| C | -5.05200300 | -1.28710800 | -0.28481000 |
| H | -4.15648800 | -1.71434500 | -2.19769800 |
| H | -2.06870300 | -0.50674400 | -1.70723200 |
| H | -3.57300100 | 0.50832600  | 2.18964200  |
| H | -5.66781000 | -0.71654000 | 1.69880400  |
| H | -5.96906500 | -1.82885900 | -0.50368700 |
| C | -1.46724500 | 0.85183400  | 0.61206600  |
| H | -1.36991300 | 1.13010900  | 1.66518500  |
| C | -0.49143200 | 1.21486300  | -0.22651100 |
| C | 0.76307000  | 1.90919200  | 0.22370300  |
| H | 0.67952400  | 2.13615100  | 1.29806200  |
| C | 2.03427600  | 1.06094000  | -0.00051800 |
| H | 2.89906500  | 1.67262000  | 0.29340700  |
| H | 2.14230300  | 0.88121100  | -1.07997300 |
| C | 2.01514300  | -0.25640200 | 0.79112200  |
| C | 1.50753000  | -1.44617300 | -0.03612900 |
| C | 2.50100600  | -1.88665600 | -1.10760100 |
| C | 3.86703100  | -2.19303000 | -0.50318500 |
| C | 4.39253800  | -1.00159300 | 0.29028300  |
| C | 3.39519600  | -0.58957400 | 1.36819300  |
| H | 2.10880900  | -2.76368800 | -1.63839500 |
| H | 1.33482900  | -2.28995700 | 0.65065700  |
| H | 0.53261800  | -1.21185200 | -0.48616000 |
| H | 1.32426700  | -0.11982300 | 1.63944400  |
| H | 3.77447800  | -3.05883700 | 0.17293800  |
| H | 4.57945400  | -2.48199800 | -1.28662900 |
| H | 5.36176900  | -1.24007000 | 0.74696400  |
| H | 4.57665000  | -0.15894400 | -0.39556900 |
| H | 3.28344000  | -1.42390500 | 2.07878500  |
| H | 3.77509000  | 0.26487200  | 1.94540000  |
| H | 2.61227200  | -1.09761700 | -1.86853400 |
| H | -0.54663500 | 0.98670300  | -1.29343200 |

### 5<sub>s</sub>

|   |            |             |             |
|---|------------|-------------|-------------|
| C | 2.68584000 | 2.43071700  | -0.27896200 |
| N | 3.29726900 | 3.24728000  | -0.83457400 |
| C | 3.72836600 | -1.63940500 | -1.01857100 |
| C | 3.24608200 | -0.33999100 | -0.88459400 |
| C | 2.50286900 | 0.01729700  | 0.23812500  |

|   |             |             |             |
|---|-------------|-------------|-------------|
| C | 2.23761600  | -0.93808900 | 1.21984800  |
| C | 2.72017600  | -2.23437400 | 1.08644400  |
| C | 3.46825800  | -2.58752000 | -0.03450000 |
| H | 4.31133700  | -1.90905000 | -1.89605100 |
| H | 3.45606800  | 0.40054800  | -1.65546400 |
| H | 1.64752000  | -0.65784500 | 2.09275400  |
| H | 2.51544100  | -2.97047200 | 1.86014100  |
| H | 3.84907800  | -3.60054200 | -0.13942000 |
| C | 1.89429500  | 1.40133800  | 0.39855400  |
| C | 0.47361500  | 1.41611600  | -0.11599500 |
| H | 0.35623300  | 1.22424500  | -1.18564900 |
| C | -0.59118200 | 1.58838900  | 0.66521900  |
| H | -0.43755500 | 1.75827800  | 1.73647800  |
| C | -2.00564100 | 1.52414600  | 0.19713700  |
| H | -2.01961200 | 1.36956900  | -0.89084800 |
| H | -2.49712300 | 2.49328100  | 0.37771700  |
| C | -2.82093600 | 0.44103500  | 0.92187600  |
| C | -4.28474600 | 0.44976600  | 0.47103000  |
| C | -4.46628900 | -0.08717700 | -0.94700200 |
| C | -3.86002500 | -1.47936300 | -1.09029300 |
| C | -2.39292700 | -1.49193500 | -0.67171800 |
| C | -2.22955000 | -0.96135500 | 0.74914700  |
| H | -5.53380200 | -0.10726200 | -1.20257900 |
| H | -4.86531900 | -0.18323400 | 1.16075800  |
| H | -4.69812000 | 1.46506900  | 0.55554700  |
| H | -2.79130900 | 0.69072000  | 1.99559000  |
| H | -4.41834100 | -2.17842700 | -0.44597900 |
| H | -3.97343600 | -1.84486200 | -2.11922100 |
| H | -1.98186100 | -2.50728700 | -0.74254200 |
| H | -1.80446500 | -0.87568800 | -1.37048600 |
| H | -2.74810400 | -1.64335800 | 1.44157900  |
| H | -1.16963700 | -0.96606000 | 1.04006600  |
| H | -3.99486300 | 0.59325600  | -1.67280600 |
| H | 1.88207400  | 1.66058800  | 1.46795700  |

### 5<sub>R</sub>

|   |             |             |             |
|---|-------------|-------------|-------------|
| C | -2.46037800 | 2.44744900  | -0.12933900 |
| N | -2.90567700 | 3.36829900  | -0.67987300 |
| C | -2.76764400 | -2.39144700 | 0.58762200  |
| C | -2.12509200 | -1.18104000 | 0.81362900  |
| C | -2.61937200 | -0.00081100 | 0.25320700  |
| C | -3.76308600 | -0.05062900 | -0.54012500 |
| C | -4.40508200 | -1.26576000 | -0.76961900 |
| C | -3.91075600 | -2.43728200 | -0.20787000 |

|   |             |             |             |
|---|-------------|-------------|-------------|
| H | -2.37423300 | -3.30293900 | 1.03151600  |
| H | -1.22646300 | -1.14380000 | 1.42855500  |
| H | -4.15979100 | 0.86174200  | -0.98246400 |
| H | -5.29609500 | -1.29171000 | -1.39252700 |
| H | -4.41280800 | -3.38472000 | -0.38857300 |
| C | -1.87286900 | 1.29410600  | 0.55544100  |
| C | -0.40774700 | 1.18776000  | 0.20537400  |
| H | -0.19477700 | 0.99143700  | -0.84620000 |
| C | 0.56134800  | 1.26545800  | 1.11666400  |
| H | 0.26934700  | 1.45829400  | 2.15301200  |
| C | 2.03265500  | 1.12864600  | 0.88251600  |
| H | 2.43865300  | 0.46534100  | 1.66122700  |
| H | 2.49969700  | 2.10618700  | 1.09037300  |
| C | 2.46349900  | 0.65210400  | -0.50499700 |
| C | 3.95988100  | 0.89073200  | -0.73711500 |
| C | 4.84119700  | -0.04268300 | 0.08754600  |
| C | 4.49764900  | -1.50063800 | -0.19789200 |
| C | 3.01769900  | -1.77564700 | 0.04781000  |
| C | 2.13397300  | -0.82629300 | -0.75824200 |
| H | 5.89939200  | 0.15229300  | -0.13001500 |
| H | 4.17776400  | 0.72301900  | -1.80396000 |
| H | 4.20722200  | 1.94146000  | -0.52965400 |
| H | 1.91877500  | 1.25968600  | -1.24515100 |
| H | 4.73146000  | -1.72124200 | -1.25256600 |
| H | 5.12072700  | -2.17185300 | 0.40748500  |
| H | 2.77336600  | -2.81479400 | -0.20874700 |
| H | 2.80095700  | -1.67247100 | 1.12266000  |
| H | 2.28582200  | -1.03298300 | -1.82961800 |
| H | 1.07382900  | -1.02805200 | -0.55017800 |
| H | 4.70694200  | 0.16300700  | 1.16122400  |
| H | -1.95529900 | 1.49984600  | 1.63505300  |

**<sup>3</sup>[LCu(MeCN)]\***

|   |             |             |             |
|---|-------------|-------------|-------------|
| C | -0.10576500 | 5.59664500  | -0.10249700 |
| H | -0.22554000 | 5.99183400  | 0.90969900  |
| H | -0.95016000 | 5.92467000  | -0.71464500 |
| H | 0.82029800  | 5.98778800  | -0.53214700 |
| C | -0.06238100 | 4.15379100  | -0.06501000 |
| N | -0.02939500 | 2.99585400  | -0.03687600 |
| C | 0.40954400  | -3.66233200 | 0.59528500  |
| C | 0.04108400  | -2.31310000 | -0.03533400 |
| C | -0.30863200 | -3.65788100 | -0.68489600 |
| C | -1.07052800 | -1.58713000 | 0.60267400  |
| O | -2.04672100 | -2.36868300 | 1.07317000  |

|    |             |             |             |
|----|-------------|-------------|-------------|
| C  | -2.52712400 | -0.10183600 | 1.37728300  |
| C  | -3.00516700 | -1.51931100 | 1.76108700  |
| H  | -2.42339800 | 0.57888000  | 2.22993300  |
| H  | -2.92775000 | -1.75807500 | 2.82521000  |
| C  | 1.14324600  | -1.56174600 | -0.66003800 |
| O  | 2.13131000  | -2.32021700 | -1.14231100 |
| C  | 2.58537600  | -0.04178900 | -1.40295300 |
| C  | 3.09267700  | -1.44522300 | -1.79559900 |
| H  | 2.46245200  | 0.65514900  | -2.24531700 |
| H  | 3.04500900  | -1.67162500 | -2.86433300 |
| N  | 1.25625400  | -0.28908700 | -0.79805200 |
| N  | -1.20505500 | -0.31913100 | 0.76330500  |
| Cu | 0.01605900  | 1.08525300  | -0.01279300 |
| C  | 4.58544600  | -0.50395900 | -0.18629800 |
| C  | 3.55849400  | 0.40955200  | -0.37545500 |
| C  | 3.43357100  | 1.63575500  | 0.48262500  |
| C  | 4.37331500  | 1.80993600  | 1.49692900  |
| C  | 5.39744700  | 0.90229700  | 1.69475400  |
| C  | 5.52399400  | -0.32229200 | 0.81412100  |
| C  | 4.47824000  | -1.62616800 | -1.18354600 |
| H  | 2.67381300  | 2.38065400  | 0.25974400  |
| H  | 4.31563800  | 2.69108600  | 2.13297500  |
| H  | 6.13727200  | 1.05965200  | 2.47414000  |
| H  | 6.32291500  | -1.03561800 | 0.99491500  |
| C  | -3.54057100 | 0.36273700  | 0.36613300  |
| C  | -4.56789600 | -0.56943700 | 0.22349500  |
| C  | -5.58599500 | -0.34889200 | -0.69818800 |
| C  | -5.55989500 | 0.81095700  | -1.46850300 |
| C  | -4.53255500 | 1.74422300  | -1.31819100 |
| C  | -3.51333300 | 1.52498100  | -0.39556700 |
| C  | -4.40292000 | -1.71572000 | 1.18263500  |
| H  | -6.38998100 | -1.07260300 | -0.81772600 |
| H  | -6.34887400 | 0.99251100  | -2.19461200 |
| H  | -4.52989500 | 2.64632600  | -1.92535100 |
| H  | -2.70757600 | 2.24842600  | -0.27315100 |
| H  | -4.49952600 | -2.70229900 | 0.71477700  |
| H  | -5.15131600 | -1.67303800 | 1.98421500  |
| H  | 5.24936500  | -1.54078500 | -1.95943100 |
| H  | 4.58597100  | -2.62139300 | -0.73698500 |
| H  | -0.13956400 | -3.91120600 | 1.49781900  |
| H  | 1.46894100  | -3.89617100 | 0.60024600  |
| H  | -1.36461400 | -3.90663300 | -0.69323100 |
| H  | 0.24344200  | -3.88646100 | -1.59093500 |

**11**

|    |             |             |             |
|----|-------------|-------------|-------------|
| C  | -1.36396000 | 1.79721400  | -0.21995700 |
| H  | -0.95137000 | 2.18168700  | -1.15803700 |
| H  | -2.45085400 | 1.92999400  | -0.24814600 |
| H  | -0.97093600 | 2.39342000  | 0.60966700  |
| C  | -1.35886700 | -0.70981100 | 1.66748000  |
| H  | -2.44557500 | -0.76539500 | 1.79388700  |
| H  | -0.95353500 | -1.72116300 | 1.77295700  |
| H  | -0.95660100 | -0.08254600 | 2.46927700  |
| C  | -1.35815300 | -1.09098400 | -1.44704300 |
| H  | -0.95770400 | -0.67551300 | -2.37713500 |
| H  | -0.94981100 | -2.09659800 | -1.30545300 |
| H  | -2.44469500 | -1.17868000 | -1.55497100 |
| Si | -0.96445200 | 0.00005700  | -0.00001100 |
| N  | 0.89859900  | 0.00331800  | -0.00093700 |
| C  | 2.05253000  | 0.00191000  | -0.00089100 |
| C  | 3.48593100  | 0.00026700  | 0.00065700  |
| H  | 3.85086000  | 0.08523300  | -1.02706700 |
| H  | 3.84978700  | 0.84726400  | 0.58933400  |
| H  | 3.84768300  | -0.93330100 | 0.44092300  |

**12**

|   |             |             |             |
|---|-------------|-------------|-------------|
| C | 2.14175200  | -2.30252100 | -2.07779700 |
| O | 0.83453600  | -2.94050700 | -1.98781600 |
| C | 2.07731000  | -1.24593400 | -0.95401300 |
| H | 2.38468600  | -0.24163800 | -1.26513200 |
| C | 0.08741600  | -2.21854800 | -1.15576400 |
| N | 0.65468500  | -1.22445600 | -0.57182600 |
| C | -1.30476000 | -2.66115100 | -1.01657800 |
| C | -1.57811900 | -4.15879600 | -1.19283900 |
| C | -1.97301000 | -3.24117700 | -2.26827900 |
| H | -0.69424300 | -4.77373200 | -1.32871800 |
| H | -2.34729400 | -4.56329100 | -0.54255700 |
| H | -1.36837100 | -3.20228800 | -3.16884000 |
| H | -3.02279500 | -2.99257200 | -2.38603300 |
| C | -4.11860200 | -1.57602400 | 0.99543000  |
| O | -3.43758100 | -2.33859000 | -0.04457700 |
| C | -3.08053900 | -0.49098900 | 1.34825100  |
| H | -2.90054000 | -0.37292900 | 2.42192200  |
| C | -2.17073000 | -1.93478300 | -0.08122500 |
| N | -1.84462900 | -0.96339800 | 0.69584200  |
| C | 4.34748400  | -3.72533800 | 0.60033100  |
| C | 4.51834300  | -3.25126200 | 1.89872400  |
| C | 3.90210500  | -2.06961300 | 2.31349300  |



|    |             |             |             |
|----|-------------|-------------|-------------|
| C  | 3.10084400  | -1.34268200 | 1.43597200  |
| C  | 2.93101700  | -1.82580500 | 0.14264900  |
| C  | 3.54587000  | -3.00411500 | -0.27820500 |
| H  | 4.83154800  | -4.64594700 | 0.27959800  |
| H  | 5.14023600  | -3.80720600 | 2.59669900  |
| H  | 4.05092400  | -1.71120300 | 3.32930900  |
| H  | 2.63511100  | -0.40827300 | 1.75377000  |
| C  | 3.24223400  | -3.29600700 | -1.72156700 |
| H  | 2.91545500  | -4.32579600 | -1.90710300 |
| H  | 4.12081700  | -3.12481900 | -2.35653900 |
| C  | -3.00098100 | 1.99734900  | 0.57205100  |
| C  | -3.61522400 | 0.75464800  | 0.68940600  |
| C  | -4.87156400 | 0.51796500  | 0.13142400  |
| C  | -5.53365900 | 1.52868100  | -0.55684300 |
| C  | -4.92056400 | 2.77266000  | -0.68187300 |
| C  | -3.66369200 | 3.00606000  | -0.12163500 |
| H  | -2.02157200 | 2.17946200  | 1.01425000  |
| H  | -6.51467200 | 1.35004900  | -0.99327100 |
| H  | -5.42586600 | 3.57075300  | -1.22091400 |
| H  | -3.19745000 | 3.98261600  | -0.22860000 |
| C  | -5.34604800 | -0.87928700 | 0.41955600  |
| H  | -5.72062600 | -1.41126900 | -0.46264500 |
| H  | -4.33970500 | -2.28136000 | 1.80074500  |
| H  | -6.15828900 | -0.88084400 | 1.15754400  |
| H  | 2.21771000  | -1.89402900 | -3.08885000 |
| C  | -0.45166700 | 0.74966000  | 2.60225300  |
| N  | -0.73451400 | 1.16488000  | 3.65866200  |
| Cu | -0.09289000 | 0.04287000  | 0.80211400  |
| N  | 1.06757200  | 1.53572600  | 0.24881900  |
| C  | 2.07065700  | 2.22775300  | 0.89722900  |
| C  | 0.71841200  | 2.17224400  | -0.92393800 |
| O  | -0.16565800 | 1.81336200  | -1.69012500 |
| O  | 2.58638100  | 1.93075100  | 1.96334300  |
| C  | 1.60439100  | 3.36440900  | -1.07652400 |
| C  | 2.43019300  | 3.40159100  | 0.04014900  |
| C  | 3.37740600  | 4.39380700  | 0.20731100  |
| C  | 3.47079800  | 5.36495500  | -0.79451500 |
| C  | 2.63936400  | 5.32787900  | -1.91549300 |
| C  | 1.68558900  | 4.31834000  | -2.07337900 |
| H  | 4.01985600  | 4.41428400  | 1.08442600  |
| H  | 4.20214700  | 6.16417800  | -0.70135400 |
| H  | 2.73852400  | 6.09866900  | -2.67603900 |
| H  | 1.03285700  | 4.28074300  | -2.94261000 |

## 13

|   |             |             |             |
|---|-------------|-------------|-------------|
| C | -2.13098200 | -1.96828200 | 1.22249900  |
| O | -0.89610200 | -2.69400000 | 0.94865800  |
| C | -2.12891900 | -0.91108100 | 0.10801900  |
| H | -2.39203200 | 0.07968000  | 0.48364500  |
| C | -0.16755500 | -1.94102900 | 0.12861700  |
| N | -0.72571200 | -0.88673100 | -0.35856800 |
| C | 1.18855200  | -2.43546800 | -0.11870300 |
| C | 1.35226500  | -3.95995300 | -0.18660700 |
| C | 1.84193200  | -3.25148300 | 1.00126700  |
| H | 0.42603200  | -4.52172900 | -0.11582600 |
| H | 2.07059500  | -4.31101500 | -0.92044000 |
| H | 1.26632400  | -3.29966000 | 1.92100500  |
| H | 2.90999300  | -3.09479700 | 1.11770200  |
| C | 4.01546100  | -1.28307700 | -2.05710700 |
| O | 3.29497100  | -2.14699900 | -1.13189200 |
| C | 3.12444000  | -0.02558800 | -2.10414800 |
| H | 2.91626400  | 0.33735100  | -3.11522600 |
| C | 2.08695300  | -1.62395100 | -0.94443600 |
| N | 1.85637000  | -0.47846800 | -1.48467300 |
| C | -4.68058600 | -3.26854400 | -1.18363700 |
| C | -4.93120200 | -2.82676700 | -2.48020700 |
| C | -4.26052100 | -1.71607800 | -2.99246500 |
| C | -3.33197400 | -1.02898400 | -2.21454900 |
| C | -3.08526600 | -1.46925700 | -0.91732300 |
| C | -3.75302700 | -2.58440100 | -0.40601800 |
| H | -5.19958000 | -4.13867000 | -0.78596800 |
| H | -5.65228600 | -3.35423600 | -3.10030000 |
| H | -4.46147900 | -1.38506500 | -4.00860200 |
| H | -2.80477600 | -0.16907400 | -2.62041800 |
| C | -3.34310800 | -2.86151800 | 1.01308600  |
| H | -3.10666800 | -3.91304100 | 1.21291200  |
| H | -4.13341600 | -2.57375900 | 1.71918500  |
| C | 3.46030100  | 2.24725600  | -0.86071300 |
| C | 3.86696000  | 0.97608900  | -1.25367700 |
| C | 5.09781100  | 0.45860500  | -0.84523900 |
| C | 5.93015900  | 1.19742500  | -0.01106400 |
| C | 5.51743600  | 2.46176700  | 0.40072100  |
| C | 4.29586300  | 2.98500300  | -0.02649800 |
| H | 2.50015600  | 2.64502600  | -1.17965200 |
| H | 6.88821500  | 0.79442500  | 0.31227000  |
| H | 6.15514200  | 3.05031600  | 1.05648400  |
| H | 3.99078100  | 3.97665500  | 0.29904000  |
| C | 5.35764700  | -0.88856800 | -1.45755800 |

|    |             |             |             |
|----|-------------|-------------|-------------|
| H  | 5.70776000  | -1.64450800 | -0.74499600 |
| H  | 4.08727400  | -1.83043500 | -3.00114300 |
| H  | 6.11653200  | -0.82370400 | -2.24774500 |
| H  | -2.04223500 | -1.56261400 | 2.23643900  |
| C  | 0.75564400  | 1.74286200  | -2.92554400 |
| N  | 1.13614500  | 2.39468900  | -3.81873000 |
| Cu | 0.14161900  | 0.61719000  | -1.43433700 |
| N  | -0.95757800 | 1.48591700  | 1.97793800  |
| C  | 0.27466700  | 1.36991300  | 1.43079200  |
| C  | -1.00274400 | 0.67178200  | 3.08354800  |
| O  | -1.99321100 | 0.44790800  | 3.77756600  |
| O  | 0.66391000  | 1.88422900  | 0.36580700  |
| C  | 0.34083800  | 0.01830500  | 3.29459300  |
| C  | 1.14171100  | 0.46387500  | 2.25374000  |
| C  | 2.45529500  | 0.05804500  | 2.10879600  |
| C  | 2.95724300  | -0.82264400 | 3.07443200  |
| C  | 2.15182800  | -1.27963700 | 4.12015500  |
| C  | 0.81786900  | -0.86908900 | 4.24065900  |
| H  | 3.06286000  | 0.41225300  | 1.27460100  |
| H  | 3.98919700  | -1.16268800 | 3.01011200  |
| H  | 2.57064300  | -1.96803500 | 4.85101200  |
| H  | 0.18415700  | -1.22573500 | 5.05029600  |
| Si | -3.92585600 | 2.90000400  | 0.30628100  |
| C  | -4.51879100 | 1.44151100  | 1.31296100  |
| H  | -5.42270100 | 1.73721100  | 1.85904100  |
| H  | -3.75921900 | 1.13477000  | 2.04532100  |
| H  | -4.78272000 | 0.58747200  | 0.67617300  |
| C  | -5.20330300 | 3.49210900  | -0.92088100 |
| H  | -6.07143600 | 3.89419500  | -0.38662000 |
| H  | -5.54873400 | 2.66782100  | -1.55449900 |
| H  | -4.80526700 | 4.28222900  | -1.56559300 |
| C  | -3.14056200 | 4.24031100  | 1.32983200  |
| H  | -2.75777200 | 5.05665200  | 0.70954300  |
| H  | -2.31288400 | 3.79594000  | 1.89377000  |
| H  | -3.87011200 | 4.65330600  | 2.03510200  |
| C  | -2.51188200 | 2.20420800  | -0.78223900 |
| N  | -1.66105600 | 1.67942200  | -1.37318500 |

### TS11

|   |             |             |            |
|---|-------------|-------------|------------|
| C | -2.61485000 | -1.43844000 | 1.75349800 |
| O | -1.42995000 | -2.28235400 | 1.89630900 |
| C | -2.38605400 | -0.77230000 | 0.38372100 |
| H | -2.53168500 | 0.31224400  | 0.40324000 |
| C | -0.57418900 | -1.94620000 | 0.94160700 |

|   |             |             |             |
|---|-------------|-------------|-------------|
| N | -0.96997700 | -1.07386300 | 0.07759800  |
| C | 0.71751300  | -2.64006200 | 0.98100800  |
| C | 0.67318900  | -4.14041500 | 1.33219800  |
| C | 1.18777700  | -3.19127400 | 2.32454200  |
| H | -0.32336700 | -4.55098400 | 1.46251600  |
| H | 1.37421400  | -4.75969800 | 0.78106000  |
| H | 0.55838400  | -2.93344600 | 3.17039200  |
| H | 2.25910600  | -3.14144900 | 2.49269400  |
| C | 3.78317700  | -2.41206600 | -0.93324000 |
| O | 2.94159400  | -2.78786600 | 0.19698000  |
| C | 2.92833300  | -1.35005600 | -1.65734400 |
| H | 2.80497400  | -1.53197300 | -2.73004000 |
| C | 1.74661300  | -2.24111500 | 0.01711100  |
| N | 1.61117800  | -1.46177900 | -0.99921900 |
| C | -5.05216900 | -3.18723100 | -0.49425800 |
| C | -5.16261700 | -3.08066300 | -1.87840100 |
| C | -4.36760400 | -2.18060500 | -2.58909100 |
| C | -3.44525000 | -1.37661400 | -1.92406000 |
| C | -3.33111900 | -1.49377700 | -0.54216300 |
| C | -4.12964000 | -2.38801900 | 0.17202000  |
| H | -5.67785200 | -3.88634000 | 0.05733400  |
| H | -5.87791100 | -3.70282600 | -2.41123900 |
| H | -4.46993800 | -2.10432500 | -3.66881400 |
| H | -2.83154900 | -0.66590900 | -2.47614500 |
| C | -3.86605600 | -2.30078800 | 1.64982900  |
| H | -3.71586700 | -3.27361500 | 2.13226700  |
| H | -4.69890800 | -1.81463200 | 2.17336600  |
| C | 3.19419000  | 1.23961700  | -1.66452800 |
| C | 3.61615200  | -0.04734200 | -1.35172300 |
| C | 4.79881900  | -0.26745500 | -0.64450500 |
| C | 5.58520600  | 0.80811000  | -0.24646000 |
| C | 5.17053900  | 2.10026300  | -0.56542000 |
| C | 3.98246100  | 2.31577000  | -1.26542200 |
| H | 2.25900900  | 1.40945500  | -2.19716800 |
| H | 6.50991600  | 0.64435100  | 0.30368600  |
| H | 5.77512300  | 2.95052300  | -0.25848600 |
| H | 3.65440000  | 3.32858400  | -1.48258500 |
| C | 5.06025300  | -1.73451900 | -0.44723300 |
| H | 5.27390100  | -2.00652400 | 0.59348000  |
| H | 3.95485700  | -3.32795600 | -1.50420900 |
| H | 5.91730400  | -2.07253900 | -1.04288100 |
| H | -2.60294100 | -0.73749600 | 2.59433700  |
| C | 0.56582200  | -0.35171400 | -3.43832300 |
| N | 0.93496100  | -0.29840200 | -4.54623800 |

|    |             |             |             |
|----|-------------|-------------|-------------|
| Cu | -0.01967700 | -0.46418000 | -1.57238800 |
| N  | -0.89355100 | 2.60593000  | 1.14608100  |
| C  | 0.44569000  | 2.53796000  | 0.80357200  |
| C  | -1.12753000 | 1.78711900  | 2.22927100  |
| O  | -2.19864900 | 1.58764000  | 2.79343900  |
| O  | 0.96252000  | 3.14742500  | -0.12426000 |
| C  | 0.16356600  | 1.12616300  | 2.60792500  |
| C  | 1.12982100  | 1.58030600  | 1.72209300  |
| C  | 2.43742600  | 1.13305700  | 1.77848200  |
| C  | 2.75038900  | 0.20012700  | 2.77272700  |
| C  | 1.78217200  | -0.24332300 | 3.67651400  |
| C  | 0.46222000  | 0.21576500  | 3.60479800  |
| H  | 3.18832000  | 1.49976100  | 1.08182600  |
| H  | 3.76803500  | -0.17982800 | 2.84940100  |
| H  | 2.06211200  | -0.95815200 | 4.44750500  |
| H  | -0.30029400 | -0.12974100 | 4.30058500  |
| Si | -2.15397300 | 3.75266600  | -0.18882700 |
| C  | -3.79964200 | 3.16034200  | 0.49674100  |
| H  | -4.47029900 | 4.02778100  | 0.54939000  |
| H  | -3.70712600 | 2.71015800  | 1.48901900  |
| H  | -4.26281300 | 2.43187500  | -0.18169900 |
| C  | -2.62716800 | 4.60491200  | -1.84359600 |
| H  | -3.24738100 | 5.49214200  | -1.65427400 |
| H  | -3.18626800 | 3.93344400  | -2.50996100 |
| H  | -1.73609500 | 4.94245600  | -2.39062600 |
| C  | -1.43671800 | 5.25450700  | 0.71717300  |
| H  | -0.37867700 | 5.39068200  | 0.46757500  |
| H  | -1.50945300 | 5.12277400  | 1.80253400  |
| H  | -1.97573000 | 6.16324700  | 0.42090800  |
| C  | -1.53020300 | 2.15459900  | -1.23759400 |
| N  | -1.21353100 | 1.14457900  | -1.73118200 |

#### 14

|   |             |             |             |
|---|-------------|-------------|-------------|
| C | 3.03752500  | 1.35180700  | 1.72981500  |
| O | 2.09411900  | 2.24839000  | 1.07083500  |
| C | 2.53222100  | -0.04240400 | 1.30381500  |
| H | 2.41093100  | -0.75287500 | 2.12735500  |
| C | 1.10278100  | 1.50734300  | 0.58602000  |
| N | 1.21015400  | 0.23175700  | 0.70726200  |
| C | 0.00048600  | 2.25425600  | -0.02935300 |
| C | 0.35364000  | 3.59041600  | -0.69347900 |
| C | -0.34826500 | 3.61061000  | 0.59475400  |
| H | 1.41286900  | 3.82535700  | -0.71661300 |
| H | -0.20617000 | 3.81441100  | -1.59607500 |

|    |             |             |             |
|----|-------------|-------------|-------------|
| H  | 0.21304500  | 3.85805100  | 1.49028200  |
| H  | -1.40639500 | 3.85073800  | 0.61093600  |
| C  | -3.05483100 | 1.31584600  | -1.73876200 |
| O  | -2.10226600 | 2.22369800  | -1.10915400 |
| C  | -2.54636600 | -0.06966500 | -1.29050700 |
| H  | -2.43921300 | -0.79553500 | -2.10343100 |
| C  | -1.10533900 | 1.49395100  | -0.62049400 |
| N  | -1.21553700 | 0.21524500  | -0.71807700 |
| C  | 5.58314600  | 0.22301600  | -0.78111100 |
| C  | 5.53509700  | -0.90809100 | -1.59193100 |
| C  | 4.49378800  | -1.82929800 | -1.46805200 |
| C  | 3.48067600  | -1.62898400 | -0.53399200 |
| C  | 3.52862900  | -0.49237400 | 0.26692400  |
| C  | 4.57198500  | 0.42656000  | 0.15165300  |
| H  | 6.39890200  | 0.93717800  | -0.87685600 |
| H  | 6.31812600  | -1.07689400 | -2.32760700 |
| H  | 4.47457800  | -2.71122300 | -2.10377800 |
| H  | 2.67200000  | -2.35058100 | -0.42335700 |
| C  | 4.43562800  | 1.54014100  | 1.15276500  |
| H  | 4.55039700  | 2.54147200  | 0.72161000  |
| H  | 5.18509600  | 1.45208700  | 1.94958500  |
| C  | -3.47088800 | -1.61449500 | 0.59570800  |
| C  | -3.52864000 | -0.49645900 | -0.23048100 |
| C  | -4.57019800 | 0.42530800  | -0.12283100 |
| C  | -5.57004800 | 0.24312700  | 0.82627800  |
| C  | -5.51236400 | -0.86953800 | 1.66146400  |
| C  | -4.47247100 | -1.79345500 | 1.54625900  |
| H  | -2.66362600 | -2.34034700 | 0.49686700  |
| H  | -6.38440400 | 0.95960500  | 0.91584500  |
| H  | -6.28660100 | -1.02190300 | 2.40987100  |
| H  | -4.44515100 | -2.66060800 | 2.20152800  |
| C  | -4.44535500 | 1.51762700  | -1.14851200 |
| H  | -4.55339800 | 2.52755400  | -0.73620400 |
| H  | -2.99308400 | 1.50222200  | -2.81392900 |
| H  | -5.20462900 | 1.41444600  | -1.93407400 |
| H  | 2.96362100  | 1.56030300  | 2.80023200  |
| C  | 1.12273500  | -3.33045800 | 2.01292500  |
| N  | 0.70305500  | -2.53109500 | 1.25316600  |
| Cu | 0.00540000  | -1.21243200 | -0.00571200 |
| C  | -0.68061000 | -2.57983000 | -1.24872400 |
| N  | -1.11854000 | -3.37581800 | -1.98533900 |

**2\*...1**

|   |             |             |            |
|---|-------------|-------------|------------|
| C | -2.58196600 | -0.89950900 | 0.94714100 |
|---|-------------|-------------|------------|

|   |             |             |             |
|---|-------------|-------------|-------------|
| C | -2.89037800 | -1.96637000 | 0.03931400  |
| C | -4.19612900 | -2.11341300 | -0.45148200 |
| C | -5.17053000 | -1.22257700 | -0.04319900 |
| C | -4.86184200 | -0.16391400 | 0.85626900  |
| C | -3.57994800 | 0.00010400  | 1.34270600  |
| C | -1.18174000 | -0.92932600 | 1.26635800  |
| C | -1.70035200 | -2.72292400 | -0.24363600 |
| H | -4.42685500 | -2.92124300 | -1.14552900 |
| H | -6.18854500 | -1.32556800 | -0.41475400 |
| H | -5.64662100 | 0.53167200  | 1.14906600  |
| H | -3.32711000 | 0.82630700  | 2.00728200  |
| O | -1.45337500 | -3.67366900 | -0.99561100 |
| O | -0.43093300 | -0.18691000 | 1.91234100  |
| N | -0.74884700 | -2.11493700 | 0.61583300  |
| O | 0.59245500  | -2.39405400 | 0.53674100  |
| C | 1.25052400  | -1.64080900 | -0.39919300 |
| O | 0.69209500  | -0.96543700 | -1.22515200 |
| C | 3.53286000  | -1.39017300 | -1.40816900 |
| H | 3.28208000  | -2.07423100 | -2.22906600 |
| C | 2.72706400  | -1.74317300 | -0.16396300 |
| H | 2.95557700  | -2.77349300 | 0.15178900  |
| C | 3.06946400  | -0.79819800 | 1.00264900  |
| H | 2.74135100  | 0.21859000  | 0.73154100  |
| H | 2.48792500  | -1.08076900 | 1.88809600  |
| C | 4.56553100  | -0.80006200 | 1.28769200  |
| H | 4.78913100  | -0.08139000 | 2.08716300  |
| H | 4.85983100  | -1.79342700 | 1.66284500  |
| C | 5.37841400  | -0.47742000 | 0.03818300  |
| H | 6.45245000  | -0.52581900 | 0.25882500  |
| H | 5.17042900  | 0.56043400  | -0.26965900 |
| C | 5.02662300  | -1.41917200 | -1.10832400 |
| H | 5.59735600  | -1.16031900 | -2.00898900 |
| H | 5.32006700  | -2.44598100 | -0.83601800 |
| H | 3.23824500  | -0.38341600 | -1.74294000 |
| C | -2.62807900 | 3.90686600  | -0.16928900 |
| C | -1.25446600 | 3.72375800  | -0.09213400 |
| C | -0.65568300 | 2.56277200  | -0.60663500 |
| C | -1.48038700 | 1.59572700  | -1.20082100 |
| C | -2.85539600 | 1.77942400  | -1.27393900 |
| C | -3.43511800 | 2.93668800  | -0.76375000 |
| H | -3.07351800 | 4.81453400  | 0.23318400  |
| H | -0.63652200 | 4.49686900  | 0.36167200  |
| H | -1.02802700 | 0.67645300  | -1.57352700 |
| H | -3.48034500 | 1.00156000  | -1.70822100 |

|   |             |            |             |
|---|-------------|------------|-------------|
| H | -4.51292600 | 3.07734500 | -0.81580500 |
| C | 0.78363000  | 2.33178300 | -0.56964900 |
| H | 1.12683200  | 1.46683700 | -1.14472100 |
| C | 1.70793700  | 3.05023000 | 0.09700000  |
| H | 1.41167700  | 3.89259300 | 0.72718100  |
| C | 3.12218000  | 2.75156500 | 0.03729300  |
| H | 3.40916700  | 1.95083600 | -0.65117300 |
| C | 4.07059100  | 3.37200300 | 0.75139000  |
| H | 3.82148300  | 4.17190800 | 1.44747100  |
| H | 5.12004600  | 3.10153700 | 0.66605900  |

**LCu<sup>+</sup>...2<sup>-</sup>...1**

|   |             |             |             |
|---|-------------|-------------|-------------|
| C | 3.83333000  | 2.37813200  | 1.94463000  |
| C | 3.12832100  | 1.17565500  | 2.25629900  |
| C | 3.80170200  | 0.08622900  | 2.83470300  |
| C | 5.15088600  | 0.21336700  | 3.09852100  |
| C | 5.85090000  | 1.40740000  | 2.79074500  |
| C | 5.19928900  | 2.48539900  | 2.21487900  |
| C | 2.92733200  | 3.32678600  | 1.33157000  |
| C | 1.77557300  | 1.31503700  | 1.84768200  |
| H | 3.26217600  | -0.83297500 | 3.06108700  |
| H | 5.69237900  | -0.61612200 | 3.54841600  |
| H | 6.91407000  | 1.47163900  | 3.01048900  |
| H | 5.73203200  | 3.40292600  | 1.97088900  |
| O | 0.79073700  | 0.51064000  | 1.88595000  |
| O | 3.07156300  | 4.46021300  | 0.87586100  |
| N | 1.69721300  | 2.62504600  | 1.35707800  |
| O | 0.55378700  | 3.11816000  | 0.78517300  |
| C | 0.53099000  | 2.99448600  | -0.58893000 |
| O | 1.43869500  | 2.51234500  | -1.21518100 |
| C | -0.51075900 | 4.48920700  | -2.29116200 |
| H | 0.09599100  | 5.33519500  | -1.94412500 |
| C | -0.76354000 | 3.51058600  | -1.14130700 |
| H | -1.31028000 | 4.01790500  | -0.33242900 |
| C | -1.61472100 | 2.32784700  | -1.62899000 |
| H | -1.04905600 | 1.78057600  | -2.40065100 |
| H | -1.79223500 | 1.62599800  | -0.80356100 |
| C | -2.93385500 | 2.82149400  | -2.20662400 |
| H | -3.53138600 | 1.96452600  | -2.54711900 |
| H | -3.51305900 | 3.30650200  | -1.40416100 |
| C | -2.69836500 | 3.80947800  | -3.34295300 |
| H | -3.65315200 | 4.17772400  | -3.73919400 |
| H | -2.19174400 | 3.29030800  | -4.17258800 |
| C | -1.82988000 | 4.97529200  | -2.88076200 |



|    |             |             |             |
|----|-------------|-------------|-------------|
| H  | -1.63528600 | 5.66596100  | -3.71052300 |
| H  | -2.37471100 | 5.55032300  | -2.11517000 |
| H  | 0.07831200  | 3.96901500  | -3.06212100 |
| Cu | 0.06115600  | -0.19716300 | 0.21126300  |
| C  | -2.76220300 | -2.52630200 | -2.99016500 |
| C  | -1.81232400 | -2.06084600 | -1.88936800 |
| C  | -2.03485300 | -3.54344300 | -2.21376100 |
| C  | -0.53237300 | -1.47297800 | -2.33981900 |
| O  | -0.14357900 | -1.85414900 | -3.56396600 |
| C  | 1.33545400  | -0.28648600 | -2.61992300 |
| C  | 1.09390700  | -1.16184800 | -3.87032500 |
| H  | 1.29760800  | 0.79476500  | -2.80107900 |
| H  | 0.90636200  | -0.59371600 | -4.78469900 |
| C  | -2.43491500 | -1.58339200 | -0.63650500 |
| O  | -3.72125100 | -1.93604200 | -0.46718700 |
| C  | -2.88854000 | -0.68107200 | 1.33984500  |
| C  | -4.15371500 | -1.39567100 | 0.80973800  |
| H  | -2.51275700 | -1.07995800 | 2.29048200  |
| H  | -4.47072200 | -2.24795500 | 1.41742800  |
| N  | -1.87992600 | -0.91618800 | 0.30166700  |
| N  | 0.21872300  | -0.63486800 | -1.72237000 |
| C  | -4.57876300 | 0.96714700  | 0.99165600  |
| C  | -3.26978200 | 0.76678200  | 1.42433100  |
| C  | -2.45675100 | 1.82611300  | 1.81170500  |
| C  | -2.98476400 | 3.11431100  | 1.76977800  |
| C  | -4.30098300 | 3.32406900  | 1.34970200  |
| C  | -5.10573300 | 2.25521900  | 0.95873700  |
| C  | -5.24571000 | -0.33338300 | 0.62821900  |
| H  | -1.42021300 | 1.64602900  | 2.10466600  |
| H  | -2.36704200 | 3.96149200  | 2.06237000  |
| H  | -4.70234000 | 4.33494900  | 1.32531000  |
| H  | -6.12858900 | 2.42880900  | 0.62888300  |
| C  | 2.66275600  | -0.73581800 | -2.08766800 |
| C  | 3.17227300  | -1.79179900 | -2.84056000 |
| C  | 4.38018800  | -2.38157800 | -2.47986000 |
| C  | 5.05764300  | -1.90336500 | -1.35902400 |
| C  | 4.54686000  | -0.83720000 | -0.61509200 |
| C  | 3.34302900  | -0.23923500 | -0.98146200 |
| C  | 2.27524700  | -2.13074900 | -3.99962100 |
| H  | 4.79040000  | -3.20570200 | -3.06182200 |
| H  | 6.00086900  | -2.35967700 | -1.06672500 |
| H  | 5.08882700  | -0.46238300 | 0.25222500  |
| H  | 2.95198100  | 0.61487400  | -0.42967100 |
| H  | 1.91726000  | -3.16803500 | -3.96619700 |

|   |             |             |             |
|---|-------------|-------------|-------------|
| H | 2.78611400  | -2.00330500 | -4.96165100 |
| H | -6.10480900 | -0.54256300 | 1.27753600  |
| H | -5.62356300 | -0.34573200 | -0.40178700 |
| H | -2.43770100 | -2.32039000 | -4.00436500 |
| H | -3.81693900 | -2.37580400 | -2.78650500 |
| H | -1.19062300 | -4.05359700 | -2.67068000 |
| H | -2.57310200 | -4.10679000 | -1.45607900 |
| C | -2.60767400 | -3.73307200 | 3.45389500  |
| C | -1.68026600 | -3.79592400 | 2.42281500  |
| C | -0.54654900 | -2.96740700 | 2.42511600  |
| C | -0.38547500 | -2.06522600 | 3.48629900  |
| C | -1.31417200 | -2.00406100 | 4.52018200  |
| C | -2.42853500 | -2.83883000 | 4.50999600  |
| H | -3.47932800 | -4.38400000 | 3.43476400  |
| H | -1.84336400 | -4.49472400 | 1.60309200  |
| H | 0.46677700  | -1.38784100 | 3.46953200  |
| H | -1.16983200 | -1.29615300 | 5.33311300  |
| H | -3.15696900 | -2.79124700 | 5.31582600  |
| C | 0.45827100  | -3.00394800 | 1.36642700  |
| H | 1.25647700  | -2.25661400 | 1.44723200  |
| C | 0.49850700  | -3.87462100 | 0.33868000  |
| H | -0.26999700 | -4.64680800 | 0.24564000  |
| C | 1.53339000  | -3.88361700 | -0.66910600 |
| H | 2.31424100  | -3.12290300 | -0.58101500 |
| C | 1.58525100  | -4.77333400 | -1.67132000 |
| H | 0.83022500  | -5.55238900 | -1.77694700 |
| H | 2.39606300  | -4.77067300 | -2.39561800 |

### TS9<sub>s</sub>'

|   |             |             |             |
|---|-------------|-------------|-------------|
| C | -1.72759500 | -0.25227300 | 3.85244500  |
| C | -0.94415000 | -0.03408700 | 2.55215100  |
| C | -1.16165400 | 1.07709800  | 3.58513300  |
| C | 0.39839500  | -0.64114000 | 2.51049800  |
| O | 1.04324000  | -0.65512000 | 3.68793500  |
| C | 2.26425400  | -1.74251400 | 2.00642400  |
| C | 2.38063000  | -1.13475900 | 3.41791400  |
| H | 2.17726200  | -2.83762000 | 1.97995700  |
| H | 2.62568000  | -1.85347000 | 4.20171500  |
| C | -1.74114100 | 0.04898700  | 1.31322800  |
| O | -2.93846200 | 0.62908200  | 1.46344800  |
| C | -2.55818800 | -0.06790000 | -0.74969500 |
| C | -3.58040500 | 0.65574000  | 0.16226700  |
| H | -2.20647100 | 0.53402800  | -1.59977300 |
| H | -3.73856500 | 1.71066400  | -0.08060400 |

|    |             |             |             |
|----|-------------|-------------|-------------|
| N  | -1.41549400 | -0.34397100 | 0.13712400  |
| N  | 0.99901100  | -1.17261800 | 1.50936100  |
| Cu | 0.33551300  | -1.38314200 | -0.41718900 |
| C  | 0.70019800  | -0.96306900 | -2.28698100 |
| N  | 0.48120000  | -1.13699300 | -3.42873200 |
| C  | -4.53291300 | -1.40569500 | -0.61355800 |
| C  | -3.26166900 | -1.32601200 | -1.17972000 |
| C  | -2.77611300 | -2.33398100 | -2.00593400 |
| C  | -3.58218500 | -3.44410500 | -2.24507100 |
| C  | -4.84941100 | -3.53702100 | -1.66598400 |
| C  | -5.33530000 | -2.51697700 | -0.85169300 |
| C  | -4.86717400 | -0.17115600 | 0.17675800  |
| H  | -1.78744100 | -2.24950300 | -2.45693600 |
| H  | -3.22806500 | -4.24008500 | -2.89671900 |
| H  | -5.46810600 | -4.40948900 | -1.86342600 |
| H  | -6.32957300 | -2.58605000 | -0.41417300 |
| C  | 3.46882800  | -1.23292500 | 1.27544300  |
| C  | 4.09827000  | -0.22828000 | 2.01136100  |
| C  | 5.24183800  | 0.38669200  | 1.51349000  |
| C  | 5.74206100  | -0.02101800 | 0.27735000  |
| C  | 5.10969600  | -1.02866300 | -0.45366900 |
| C  | 3.96062100  | -1.64291700 | 0.04207200  |
| C  | 3.39090500  | 0.01984000  | 3.31586400  |
| H  | 5.74729500  | 1.16398800  | 2.08315700  |
| H  | 6.64365200  | 0.44261100  | -0.11841900 |
| H  | 5.52439000  | -1.34625000 | -1.40841700 |
| H  | 3.46460400  | -2.43689300 | -0.51678900 |
| H  | 2.85250400  | 0.97821400  | 3.30715400  |
| H  | 4.07490100  | 0.05181600  | 4.17052600  |
| H  | -5.69153900 | 0.38572100  | -0.28564300 |
| H  | -5.17350100 | -0.38431400 | 1.20794800  |
| H  | -1.24157800 | -0.88932000 | 4.58424900  |
| H  | -2.79590800 | -0.39618900 | 3.72815300  |
| H  | -0.27331000 | 1.38356300  | 4.12907400  |
| H  | -1.83720700 | 1.87053200  | 3.27971600  |
| C  | -2.78503800 | 4.42532800  | -1.33951600 |
| C  | -1.71291900 | 3.56547200  | -1.47942000 |
| C  | -0.97781800 | 3.15299900  | -0.35035600 |
| C  | -1.35919500 | 3.64441300  | 0.90904700  |
| C  | -2.43269800 | 4.51057300  | 1.04096700  |
| C  | -3.16718500 | 4.91172900  | -0.07901400 |
| H  | -3.34939100 | 4.73262600  | -2.21833100 |
| H  | -1.44836700 | 3.19469000  | -2.46753200 |
| H  | -0.78286200 | 3.35275200  | 1.78659200  |

|   |             |             |             |
|---|-------------|-------------|-------------|
| H | -2.71034000 | 4.88564800  | 2.02418100  |
| C | 0.11714300  | 2.22161200  | -0.43518300 |
| H | 0.49644900  | 1.84162100  | 0.51770400  |
| C | 0.73475700  | 1.77873100  | -1.56623500 |
| C | 1.77691900  | 0.82487500  | -1.49275900 |
| H | 2.06105400  | 0.48455100  | -0.49137800 |
| C | 2.85841000  | 0.76661900  | -2.50978700 |
| H | 2.45402100  | 0.91246900  | -3.51863200 |
| H | 3.36068900  | -0.20816900 | -2.47814500 |
| H | 0.44870900  | 2.14238800  | -2.55409100 |
| N | 0.02123400  | -3.49901000 | -0.43131800 |
| C | -0.34487100 | -4.58544700 | -0.59820200 |
| C | -0.80767100 | -5.93950100 | -0.80796400 |
| H | -0.19090700 | -6.63972700 | -0.23882900 |
| H | -1.84641000 | -6.03104200 | -0.47893700 |
| H | -0.74718200 | -6.19344600 | -1.86962400 |
| C | 3.87310500  | 1.87032400  | -2.17487600 |
| H | 3.39110100  | 2.85525700  | -2.26695700 |
| H | 4.19117100  | 1.77348700  | -1.12384200 |
| C | 5.09531800  | 1.80307900  | -3.07953700 |
| H | 5.57469000  | 0.81912400  | -2.96314700 |
| H | 4.77394900  | 1.86278400  | -4.12946300 |
| C | 6.09063200  | 2.90774100  | -2.76939700 |
| H | 6.97297500  | 2.85275400  | -3.41542000 |
| H | 5.63677500  | 3.89702800  | -2.90680700 |
| H | 6.43354200  | 2.84567000  | -1.72846400 |
| C | -4.34021900 | 5.82948900  | 0.04810900  |
| H | -4.27435500 | 6.65428200  | -0.67029800 |
| H | -5.27544300 | 5.29780000  | -0.16687100 |
| H | -4.41746800 | 6.25164200  | 1.05409500  |

**TS9<sub>R</sub>'**

|   |             |             |             |
|---|-------------|-------------|-------------|
| C | -0.08079400 | -4.26774600 | -0.46083600 |
| C | -0.16417000 | -2.73962800 | -0.49114900 |
| C | -1.00093400 | -3.63590700 | -1.41702600 |
| C | -0.89791700 | -2.10569300 | 0.62306600  |
| O | -1.81336600 | -2.90309300 | 1.19485300  |
| C | -1.70164900 | -0.79271200 | 2.22782900  |
| C | -2.51943700 | -2.10516400 | 2.17167000  |
| H | -1.10043100 | -0.67412500 | 3.14049700  |
| H | -2.51691700 | -2.67317400 | 3.10444000  |
| C | 0.97975500  | -2.04415500 | -1.11216900 |
| O | 1.59180400  | -2.74283000 | -2.07721400 |
| C | 2.61719900  | -0.65969100 | -1.71183200 |

|    |             |             |             |
|----|-------------|-------------|-------------|
| C  | 2.75394700  | -1.98716700 | -2.49435000 |
| H  | 2.42472700  | 0.21251300  | -2.35218400 |
| H  | 2.68393800  | -1.87910100 | -3.57858900 |
| N  | 1.44670100  | -0.87924000 | -0.84044100 |
| N  | -0.76762600 | -0.91926700 | 1.09123200  |
| Cu | 0.95382100  | 0.25876900  | 0.82927600  |
| C  | 0.76025400  | 2.18473200  | 1.18538900  |
| N  | 0.73064000  | 3.01652400  | 2.01584900  |
| C  | 4.68075900  | -1.67937100 | -1.08809300 |
| C  | 3.89563300  | -0.53859000 | -0.93495100 |
| C  | 4.30375900  | 0.51311600  | -0.12300200 |
| C  | 5.52082000  | 0.40918400  | 0.54485000  |
| C  | 6.31035000  | -0.73299100 | 0.39624800  |
| C  | 5.89713400  | -1.78361400 | -0.42025800 |
| C  | 4.05395900  | -2.66370400 | -2.03676000 |
| H  | 3.67692000  | 1.39653400  | -0.00182400 |
| H  | 5.86012600  | 1.22344600  | 1.18153200  |
| H  | 7.26111600  | -0.80066600 | 0.92053300  |
| H  | 6.52016100  | -2.66796000 | -0.53893000 |
| C  | -2.73024400 | 0.29246700  | 2.07604000  |
| C  | -3.98360300 | -0.24875400 | 1.78781900  |
| C  | -5.08723300 | 0.58165200  | 1.63383400  |
| C  | -4.91737100 | 1.95826400  | 1.76359100  |
| C  | -3.66313800 | 2.49611400  | 2.05462300  |
| C  | -2.55824200 | 1.66380200  | 2.22101500  |
| C  | -3.93070700 | -1.74652700 | 1.68922200  |
| H  | -6.06603100 | 0.16387800  | 1.40095100  |
| H  | -5.77185000 | 2.62030200  | 1.63890100  |
| H  | -3.54919500 | 3.57251200  | 2.16269100  |
| H  | -1.57969300 | 2.07930100  | 2.45619600  |
| H  | -4.05714700 | -2.08220800 | 0.64885900  |
| H  | -4.71024500 | -2.24050200 | 2.27960600  |
| H  | 4.70969800  | -2.88483100 | -2.88696100 |
| H  | 3.82889600  | -3.62496800 | -1.55750900 |
| H  | -0.49422800 | -4.73728200 | 0.42515600  |
| H  | 0.84610900  | -4.68857100 | -0.83552200 |
| H  | -2.06607500 | -3.65688100 | -1.19947600 |
| H  | -0.72814000 | -3.60894300 | -2.46740600 |
| C  | -5.44538200 | 1.26797800  | -1.72073100 |
| C  | -4.14566300 | 1.68032600  | -1.49540400 |
| C  | -3.09199300 | 0.74811900  | -1.52288100 |
| C  | -3.39520300 | -0.59668200 | -1.79650200 |
| C  | -4.70100400 | -1.00500200 | -2.00620000 |
| C  | -5.74941600 | -0.07897100 | -1.96441500 |

|   |             |             |             |
|---|-------------|-------------|-------------|
| H | -6.25439500 | 1.99648200  | -1.69627300 |
| H | -3.93928500 | 2.73114700  | -1.30335400 |
| H | -2.58017800 | -1.32027000 | -1.83918800 |
| H | -4.91859600 | -2.05232300 | -2.21016200 |
| C | -1.71437200 | 1.09602200  | -1.30959400 |
| H | -1.00348200 | 0.28087800  | -1.46982900 |
| C | -1.17786100 | 2.29627900  | -0.94856200 |
| C | 0.23145800  | 2.44085300  | -0.92509900 |
| H | 0.79571700  | 1.58492500  | -1.29801100 |
| H | -1.79461500 | 3.15820200  | -0.69330300 |
| N | 2.28050900  | -0.58440900 | 2.27883000  |
| C | 3.23872000  | -0.99839100 | 2.78261800  |
| C | 4.43482200  | -1.51284600 | 3.41265500  |
| H | 4.79763000  | -2.38754200 | 2.86540900  |
| H | 5.21372200  | -0.74490100 | 3.40592700  |
| H | 4.22223000  | -1.79832400 | 4.44633100  |
| C | 0.89010000  | 3.76407700  | -1.09673500 |
| H | 0.42323800  | 4.51354500  | -0.44451800 |
| H | 0.62299600  | 4.05562100  | -2.12991200 |
| C | 2.40289000  | 3.75700400  | -0.96549000 |
| H | 2.82077300  | 2.99280100  | -1.64254500 |
| H | 2.67126700  | 3.45290900  | 0.05726800  |
| C | 3.04109600  | 5.10172100  | -1.27255800 |
| H | 2.62089800  | 5.86297600  | -0.59892700 |
| H | 2.77161400  | 5.41423100  | -2.29243200 |
| C | -7.16873600 | -0.51030000 | -2.14979800 |
| H | -7.68478700 | -0.55459200 | -1.18158500 |
| H | -7.72459600 | 0.19818700  | -2.77332200 |
| H | -7.23555100 | -1.50283800 | -2.60527100 |
| C | 4.55252000  | 5.05018500  | -1.12299400 |
| H | 5.01865400  | 6.01893100  | -1.33014800 |
| H | 4.83415900  | 4.75440500  | -0.10415100 |
| H | 4.99033900  | 4.31435900  | -1.80982900 |

### TS10s'

|   |             |             |            |
|---|-------------|-------------|------------|
| C | -1.99218200 | -0.87804900 | 4.04382700 |
| C | -1.29878900 | -0.53147300 | 2.72479300 |
| C | -1.06632400 | 0.26342300  | 4.01671700 |
| C | -0.20796300 | -1.43422400 | 2.31340300 |
| O | 0.42179600  | -2.05580300 | 3.32459700 |
| C | 1.19404000  | -2.77680300 | 1.23333900 |
| C | 1.53554600  | -2.76451400 | 2.73388100 |
| H | 0.73794400  | -3.70926600 | 0.87175600 |
| H | 1.57023600  | -3.75161200 | 3.19841500 |

|    |             |             |             |
|----|-------------|-------------|-------------|
| C  | -2.12556900 | 0.11709300  | 1.68826900  |
| O  | -3.11666100 | 0.89040800  | 2.15841300  |
| C  | -2.99251200 | 0.92574700  | -0.19161500 |
| C  | -3.85067200 | 1.38625000  | 1.01004100  |
| H  | -2.47205100 | 1.74227900  | -0.71542000 |
| H  | -3.91133600 | 2.47224900  | 1.12472600  |
| N  | -1.97778200 | 0.05436300  | 0.41845900  |
| N  | 0.18504400  | -1.71038700 | 1.12369100  |
| Cu | -0.45481300 | -0.89640500 | -0.64896000 |
| C  | 0.13908600  | 0.31855100  | -2.07526500 |
| N  | 0.00471600  | 0.62666700  | -3.20257700 |
| C  | -5.18314900 | 0.02504600  | -0.45883500 |
| C  | -3.93956100 | 0.16687600  | -1.07179600 |
| C  | -3.68065500 | -0.38237100 | -2.32217400 |
| C  | -4.69707100 | -1.08877100 | -2.96101300 |
| C  | -5.94554400 | -1.23472200 | -2.35243300 |
| C  | -6.19805000 | -0.67742900 | -1.10048400 |
| C  | -5.22429600 | 0.71204600  | 0.87972300  |
| H  | -2.70141900 | -0.25842000 | -2.78587800 |
| H  | -4.52293300 | -1.51849200 | -3.94551900 |
| H  | -6.73278800 | -1.78260600 | -2.86537700 |
| H  | -7.17569200 | -0.78907600 | -0.63510800 |
| C  | 2.49092300  | -2.47254100 | 0.55087300  |
| C  | 3.44512500  | -2.05520000 | 1.48090000  |
| C  | 4.74516600  | -1.78345700 | 1.06609000  |
| C  | 5.06692800  | -1.93614800 | -0.28308900 |
| C  | 4.10325400  | -2.33801100 | -1.20997700 |
| C  | 2.79943200  | -2.60716900 | -0.79705600 |
| C  | 2.85791000  | -1.99125000 | 2.86645600  |
| H  | 5.50397200  | -1.47032500 | 1.78101400  |
| H  | 6.08336700  | -1.73589000 | -0.61918700 |
| H  | 4.37530200  | -2.44939300 | -2.25702700 |
| H  | 2.04201200  | -2.93960700 | -1.50634700 |
| H  | 2.64385400  | -0.95222100 | 3.15825500  |
| H  | 3.51717700  | -2.40796900 | 3.63459200  |
| H  | -6.03943900 | 1.44205800  | 0.94416300  |
| H  | -5.37308500 | 0.00403900  | 1.70526100  |
| H  | -1.66598000 | -1.80150800 | 4.51096600  |
| H  | -3.05846100 | -0.67816500 | 4.06726600  |
| H  | -0.08102400 | 0.14460000  | 4.45831100  |
| H  | -1.47839100 | 1.26785900  | 4.03293900  |
| C  | -0.92013200 | 4.49862200  | -0.84551500 |
| C  | -0.04214800 | 3.49491100  | -1.20550000 |
| C  | 0.31513100  | 2.49956200  | -0.27935100 |

|   |             |             |             |
|---|-------------|-------------|-------------|
| C | -0.23030600 | 2.55235800  | 1.01181300  |
| C | -1.09622900 | 3.57470400  | 1.37159600  |
| C | -1.46622200 | 4.55542000  | 0.44697900  |
| H | -1.20121400 | 5.25763500  | -1.57315500 |
| H | 0.34600400  | 3.45291100  | -2.22076800 |
| H | 0.05697200  | 1.79647800  | 1.74266200  |
| H | -1.49865100 | 3.61591200  | 2.38276000  |
| C | 1.27723500  | 1.45949200  | -0.58179400 |
| C | 2.43679800  | 1.68342800  | -1.39273800 |
| H | 2.40455100  | 2.45635000  | -2.16000800 |
| C | 3.57452200  | 1.00227200  | -1.15187800 |
| H | 3.56783600  | 0.23358500  | -0.37244000 |
| C | 4.87248000  | 1.24206700  | -1.82375900 |
| H | 4.76582800  | 1.99620000  | -2.61526200 |
| H | 5.18842200  | 0.30536800  | -2.31287100 |
| H | 1.39810500  | 0.69488400  | 0.19072800  |
| N | -1.12940300 | -2.60950400 | -1.67344400 |
| C | -1.72632200 | -3.38061500 | -2.29903300 |
| C | -2.48512900 | -4.33381300 | -3.07732100 |
| H | -2.39646200 | -5.33232600 | -2.64156600 |
| H | -3.53872400 | -4.03903500 | -3.08452800 |
| H | -2.11460800 | -4.35812000 | -4.10536300 |
| C | 5.96165300  | 1.65872600  | -0.83198100 |
| H | 5.99511700  | 0.93759200  | 0.00110500  |
| H | 5.69354300  | 2.62798900  | -0.38541000 |
| C | 7.33283500  | 1.74795500  | -1.48337400 |
| H | 7.59831000  | 0.76068600  | -1.89193700 |
| H | 7.28117300  | 2.42856000  | -2.34618500 |
| C | 8.40388900  | 2.21630800  | -0.51361900 |
| H | 8.48375300  | 1.53543800  | 0.34317500  |
| H | 9.38873300  | 2.27015000  | -0.98926300 |
| H | 8.16913400  | 3.21313200  | -0.11986600 |
| C | -2.44232800 | 5.62874500  | 0.80712100  |
| H | -3.42232900 | 5.42425100  | 0.35658300  |
| H | -2.58293600 | 5.70186700  | 1.88949200  |
| H | -2.11814500 | 6.60464000  | 0.42982800  |

**TS10<sub>R</sub>'**

|   |             |             |            |
|---|-------------|-------------|------------|
| C | -0.53095500 | -2.08920600 | 3.86917200 |
| C | -0.32427700 | -1.44767100 | 2.50235400 |
| C | 0.09889700  | -0.76077500 | 3.81020000 |
| C | 0.76843900  | -1.98690700 | 1.66711400 |
| O | 1.65899000  | -2.75430000 | 2.31295800 |
| C | 2.10778500  | -2.60835900 | 0.00764900 |



|    |             |             |             |
|----|-------------|-------------|-------------|
| C  | 2.64912700  | -3.17562900 | 1.34015600  |
| H  | 1.74996600  | -3.37650800 | -0.69188000 |
| H  | 2.67484600  | -4.26664900 | 1.38048100  |
| C  | -1.52465800 | -0.89822700 | 1.83670700  |
| O  | -2.55606200 | -0.64852700 | 2.65583000  |
| C  | -3.04685300 | -0.10954600 | 0.42029000  |
| C  | -3.64098600 | -0.11791300 | 1.85103700  |
| H  | -2.99716200 | 0.88489100  | -0.04716900 |
| H  | -3.87224600 | 0.87205500  | 2.25492500  |
| N  | -1.67488000 | -0.61064300 | 0.59582300  |
| N  | 0.95035300  | -1.80135800 | 0.41285000  |
| Cu | -0.20073300 | -0.70125200 | -0.90005500 |
| C  | 0.15847300  | 0.99099300  | -1.84097500 |
| N  | 0.21102400  | 1.56044900  | -2.86869500 |
| C  | -4.88901500 | -1.62748700 | 0.45698100  |
| C  | -3.90839600 | -1.06256200 | -0.35531300 |
| C  | -3.79452700 | -1.40345500 | -1.69752800 |
| C  | -4.67727700 | -2.34221000 | -2.22370900 |
| C  | -5.65784500 | -2.91832200 | -1.41291400 |
| C  | -5.77363600 | -2.56272300 | -0.07124400 |
| C  | -4.84476900 | -1.06641700 | 1.85189600  |
| H  | -3.02700400 | -0.94413600 | -2.31981500 |
| H  | -4.60934700 | -2.62295000 | -3.27257200 |
| H  | -6.34461900 | -3.64770600 | -1.83626300 |
| H  | -6.54656300 | -3.00809100 | 0.55217500  |
| C  | 3.24485000  | -1.81522000 | -0.56344800 |
| C  | 4.33874900  | -1.82467500 | 0.30042100  |
| C  | 5.52396400  | -1.19979200 | -0.07248600 |
| C  | 5.58515200  | -0.54753000 | -1.30245500 |
| C  | 4.47585100  | -0.51314000 | -2.14944500 |
| C  | 3.29445800  | -1.15467300 | -1.78590700 |
| C  | 4.02443000  | -2.54107400 | 1.58625300  |
| H  | 6.38969800  | -1.21196100 | 0.58845600  |
| H  | 6.50726100  | -0.05455200 | -1.60470900 |
| H  | 4.53837700  | 0.00924400  | -3.10107800 |
| H  | 2.42712500  | -1.14865100 | -2.44676600 |
| H  | 3.96545100  | -1.84165800 | 2.43330800  |
| H  | 4.77909800  | -3.28947600 | 1.85231700  |
| H  | -5.76680000 | -0.52576300 | 2.09769800  |
| H  | -4.71986200 | -1.83763700 | 2.62169100  |
| H  | 0.09463100  | -2.94934900 | 4.08026300  |
| H  | -1.56181300 | -2.15826700 | 4.19874800  |
| H  | 1.17140800  | -0.68457700 | 3.96891700  |
| H  | -0.48420200 | 0.11220900  | 4.08999500  |

|   |             |             |             |
|---|-------------|-------------|-------------|
| C | 4.15565300  | 1.60163300  | 0.91970100  |
| C | 2.79842300  | 1.35180800  | 0.84325000  |
| C | 1.97546300  | 2.13067800  | 0.01177400  |
| C | 2.56068900  | 3.13520900  | -0.77694800 |
| C | 3.92399000  | 3.35437600  | -0.71926300 |
| C | 4.74219900  | 2.59976200  | 0.13440400  |
| H | 4.78142400  | 1.00319400  | 1.57970900  |
| H | 2.35117900  | 0.56153700  | 1.44604700  |
| H | 1.94319300  | 3.71934800  | -1.45573100 |
| H | 4.37597600  | 4.12167600  | -1.34455700 |
| C | 0.55059300  | 1.92556300  | 0.09477800  |
| C | -0.42270000 | 2.97758000  | -0.02958600 |
| H | -0.23018800 | 3.79891400  | -0.71776600 |
| C | -1.51025000 | 2.97208000  | 0.76527600  |
| H | -1.62698800 | 2.12635900  | 1.44977700  |
| C | -2.56509200 | 4.01315300  | 0.83910600  |
| H | -2.60635800 | 4.38459800  | 1.87656700  |
| H | -3.53824600 | 3.50929400  | 0.69943500  |
| H | 0.24834300  | 1.10935900  | 0.75304700  |
| N | -0.56152000 | -2.16905900 | -2.34854200 |
| C | -0.84968900 | -2.99969900 | -3.10274700 |
| C | -1.22195400 | -4.03560800 | -4.04022600 |
| H | -0.44588900 | -4.80454000 | -4.07725200 |
| H | -2.16390600 | -4.49463900 | -3.72748500 |
| H | -1.34709500 | -3.60794000 | -5.03844600 |
| C | -2.44236500 | 5.17663600  | -0.13001300 |
| H | -1.48715700 | 5.69959700  | 0.03290800  |
| H | -2.41399100 | 4.79803400  | -1.16349500 |
| C | -3.58927900 | 6.16517500  | 0.01722700  |
| H | -4.54267100 | 5.63871900  | -0.13948600 |
| H | -3.61579800 | 6.53539200  | 1.05308100  |
| C | -3.47657800 | 7.33231100  | -0.94856500 |
| H | -3.47987800 | 6.98394300  | -1.98895600 |
| H | -4.30405200 | 8.03983700  | -0.83178500 |
| H | -2.54139800 | 7.88411800  | -0.79080100 |
| C | 6.21293500  | 2.85262900  | 0.20985200  |
| H | 6.45881400  | 3.45992000  | 1.09029000  |
| H | 6.76922300  | 1.91282700  | 0.30269500  |
| H | 6.57611300  | 3.38856800  | -0.67222000 |
